# Supplementary material for: Role of preoperative prediction of microvascular invasion in hepatocellular carcinoma based on the texture of FDG PET image: A comparison of quantitative metabolic parameters and MRI
Source: Front Physiol. 2022 Aug 12;13:928969. doi: 10.3389/fphys.2022.928969 (PMC9412047; doi:10.3389/fphys.2022.928969)
Supplement: Supplementary file 1 [file Table2.XLSX]

## Sheet: intra-observe
	1		2		3		4		5		6		7		8		9		10		11		12		13		14		15		16		17		18		19		20
	1	2	1	2	1	2	1	2	1	2	1	2	1	2	1	2	1	2	1	2	1	2	1	2	1	2	1	2	1	2	1	2	1	2	1	2	1	2	1	2
GeoX	79.7257	78.2043	85.0058	84.1	71.2807	71.4821	72.5839	73.0955	76.4333	75.4316	97.1506	95.4729	72.3407	71.7211	83.712	84.3659	90.8024	90.8239	81	81.0955	75.4194	75.553	77.2945	77.7122	86.0784	85.6885	77.1877	77.1163	86.9157	85.5175	94.2576	90.8883	89.4941	89.4413	74.697	75.303	103.132	97.1688	78.9242	78.8966
GeoY	91.2389	91.7097	114.468	112.129	107.088	107.214	110.926	110.108	106.354	106.205	98.9639	99.9754	103.203	103.626	110.393	109.555	90.3892	90.239	96.2793	95.7136	109.304	109.406	117.637	117.281	112.686	112.426	106.863	107.503	101.41	100.5	91.8409	92.7318	110.747	110.196	112.485	112.606	87.6765	91.1429	111.258	111.241
GeoF	113	93	171	170	57	56	149	157	240	190	166	203	408	380	191	164	334	318	222	220	372	387	146	139	51	61	293	344	83	114	132	179	170	179	33	33	68	77	66	58
GeoSpol	11.9948	10.8817	14.7555	14.7123	8.51908	8.44402	13.7736	14.1386	17.4808	15.5536	14.5381	16.0769	22.7921	21.9962	15.5945	14.4503	20.6219	20.1219	16.8125	16.7366	21.7634	22.1978	13.6343	13.3034	8.05824	8.81292	19.3147	20.9283	10.28	12.0478	12.9641	15.0967	14.7123	15.0967	6.48204	6.48204	9.30485	9.90149	9.167	8.59348
GeoSmax	13.9284	12.083	15.8114	15.1327	11.0454	9.21954	19.0263	17.088	24.5153	20.6155	18.7883	19.9249	27.1662	27.2947	17.0294	15.5242	25.1794	24.7386	20.2485	21.6333	25.7099	25.1794	14.8661	15.2643	9.05539	10	20.6155	23.3452	13.3417	13.9284	14.7648	17.4642	15.6525	16.2788	7.81025	8.06226	13.6015	11.1803	10.4403	10.8167
GeoAox	-68.9625	24.444	-71.5651	-7.59464	5.19443	12.5288	3.01279	20.556	-78.2317	75.9638	-64.7989	-72.4744	6.34019	-8.42697	-40.2364	-14.9314	83.1572	75.9638	-57.0948	-56.3099	13.4957	6.84277	42.2737	58.3925	6.34019	-36.8699	-67.1663	-9.86581	-77.0054	-68.9625	-61.6992	76.7595	-26.5651	10.6197	50.1944	29.7449	-72.8973	-79.6952	73.3008	-56.3099
GeoUg	111.104	91.3259	118.175	118.175	73.6838	64.4767	118.175	117.347	159.388	140.66	123.589	135.66	196.43	189.687	129.832	112.347	183.53	178.116	141.903	145.353	175.823	182.066	106.104	108.397	61.3553	66.7696	157.095	175.823	79.2548	91.7401	109.897	123.589	117.347	123.589	49.2843	48.8701	81.5477	76.1335	78.4264	73.0122
GeoUw	40.2576	34.8034	45.6303	45.6577	27.6989	26.0805	45.7153	44.9772	60.0516	52.1981	47.6986	52.155	74.0628	71.5071	49.6526	44.246	68.2954	66.33	54.6176	55.9175	69.3864	71.0328	42.2355	41.4667	25.0775	26.6011	60.3334	67.2586	32.7477	37.2619	40.5954	47.4021	45.1619	47.0322	20.4882	19.6989	31.4377	30.5527	29.1138	28.2978
GeoFmax	13.9284	12.0825	15.8113	15.132	11.045	9.21952	19.0262	17.0873	24.5143	20.6155	18.7883	19.9236	27.1642	27.2947	17.0286	15.5235	25.1792	24.7386	20.2475	21.6333	25.7087	25.1792	14.8661	15.2633	9.05473	9.99986	20.6152	23.3452	13.3414	13.9284	14.7648	17.4633	15.6524	16.2778	7.81003	8.0622	13.6014	11.18	10.4403	10.8166
GeoFmin	11.0646	9.57096	13	13.872	5	7	9.94707	10	12.277	11	11.9316	12.6433	21	19	13.4344	12.4834	16	16.9539	14.426	12.6322	19	18.3501	11.3137	10.7427	6.17458	6.71418	18.2262	19.4308	7	9.39985	10	12	12.9727	13	4.47812	4.43396	5.69717	7.51916	7	6.52198
GeoFh	13	11	15	14	5	7	10	10	24	20	17	19	21	19	15	13	25	24	17	18	19	21	14	13	7	7	19	21	13	13	14	17	13	13	6	5	13	11	10	10
GeoFv	12	11	13	15	11	9	19	16	13	11	12	13	27	27	16	15	16	17	17	17	25	25	12	12	9	9	19	23	7	11	10	12	14	16	7	7	6	8	7	7
GeoMmin	3.25598	3.17876	5.55958	5.93918	2.28239	2.49138	4.41672	4.00499	5.37167	4.81412	5.0384	5.04684	8.39705	8.43093	4.57931	5.6517	6.50049	6.34888	5.22611	5.15842	8.72885	8.5736	5.45461	4.85358	2.32772	2.7221	7.96982	8.44332	3.41068	4.29099	4.45525	5.66332	5.94899	6.10966	1.76488	1.36128	2.3273	3.14739	2.50078	1.24568
GeoMmax	7.6111	6.54161	8.12779	8.13003	6.0494	4.89093	9.94333	8.80477	12.6394	10.9317	9.58097	9.9809	14.3	14.8028	9.06616	7.81198	13.0034	12.7437	10.8419	11.1519	13.0734	13.2148	7.73353	7.86187	4.68693	5.13586	10.5455	11.8589	6.94082	6.98057	7.51367	9.19956	8.11331	8.55143	4.40656	4.27874	7.06931	5.83292	5.55517	6.0458
GeoMaver	5.6144	4.96949	6.91673	6.91399	3.93249	3.76298	6.55867	6.65802	8.59749	7.57852	7.00108	7.69909	10.9996	10.6656	7.38923	6.81275	9.93458	9.6333	8.0645	8.16908	10.5134	10.7377	6.43501	6.26288	3.62393	4.00469	9.22137	10.0553	4.77499	5.64291	6.06239	7.14395	6.93082	7.09202	2.90903	2.86652	4.42532	4.53314	4.15445	3.96911
GeoFt	113	93	171	170	57	56	149	157	240	190	166	203	408	380	191	164	334	318	222	220	372	387	146	139	51	61	293	344	83	114	132	179	170	179	33	33	68	77	66	58
GeoUl	111.104	91.3259	118.175	118.175	73.6838	64.4767	118.175	117.347	159.388	140.66	123.589	135.66	196.43	189.687	129.832	112.347	183.53	178.116	141.903	145.353	175.823	182.066	106.104	108.397	61.3553	66.7696	157.095	175.823	79.2548	91.7401	109.897	123.589	117.347	123.589	49.2843	48.8701	81.5477	76.1335	78.4264	73.0122
GeoS1	4	4	5	5	3	3	5	5	6	5	5	5	8	7	5	5	7	7	6	5	8	7	5	5	3	3	7	7	3	4	5	5	5	5	2	2	3	3	3	3
GeoS2	0	0	0	0	0	0	0	0	0	0	0	1	0	0	0	0	0	0	0	0	0	0	0	0	0	0	0	0	0	0	0	0	0	0	0	0	0	0	0	0
GeoLsz	27.5563	35.799	37.6274	32.1421	16.0711	20.7279	37.2132	24.7279	42.2132	28.9706	27.1421	24.8995	48.2843	49.0416	36.2132	29.1421	60.3553	64.0122	37.799	42.2132	40.7279	38.5563	29.3848	24.3848	15.8995	12.6569	44.2132	50.2843	12.8284	20.4853	32.3848	23.4853	30.6274	39.2132	13.0711	11.0711	18.7279	14.0711	20.3137	21.3137
GeoS	11.3798	9.57096	13	13.872	5	7	9.94707	10	12.277	11	12	12.6433	21.4429	20.2576	13.4344	12.7279	16	17	16.232	12.6322	19.799	18.3501	12	12	6.17458	7	18.3848	19.477	7	9.89949	10	12	13	13.4344	4.47812	5	5.69717	7.6134	7	6.52198
GeoL	12.4758	11.1654	15	14.7532	11	9	18.6736	16	24.0643	20	17	19.4966	23.8269	23.5684	16.5576	14.8492	25	24	17.5062	21.573	21.9203	24.6087	14	13	8.40414	9	19.0919	20.9578	13	12.7279	14	17	14	15.2148	7.6074	7	13.5986	10.7367	10	10.4787
GeoSxL	141.972	106.863	195	204.656	55	63	185.747	160	295.437	220	204	246.502	510.916	477.438	222.441	189	400	408	284.162	272.515	434	451.571	168	156	51.892	63	351	408.194	91	126	140	204	182	204.401	34.0668	35	77.4735	81.7427	70	68.3418
GeoD1	4	3.64005	5.70088	6.0208	2.54951	3.04138	4.52769	5	5.52268	5.02494	5.02494	5.52268	8.94427	9.19239	5.59017	5.70088	7.10634	7	6.0208	6.0208	9.01388	8.73212	5.52268	5	2.54951	3.04138	8.13941	8.63134	3.53553	4.30116	4.71699	6.0208	6.04152	6.04152	2	1.80278	2.54951	3.53553	3.04138	2.5
GeoD2	7.15891	6.26498	8.20061	8	5.59017	4.92443	9.51315	8.73212	12.2577	10.4403	9.48683	9.96243	13.5831	13.6473	8.74643	8.06226	13.0096	12.3693	10.2956	10.9772	12.855	13.0863	7.76209	7.81025	4.60977	5.14782	10.3078	11.6726	7	6.96419	7.5	8.73212	8.06226	8.24621	4.272	4.03113	6.80074	5.70088	5.38516	5.59017
GeoFd2	161.007	123.308	211.272	201.062	98.1748	76.1836	284.314	239.546	472.024	342.434	282.743	311.803	579.624	585.122	240.332	204.204	531.715	480.664	333.009	378.562	519.148	537.998	189.281	191.637	66.7588	83.2522	333.794	428.042	153.938	152.367	176.715	239.546	204.204	213.628	57.3341	51.0509	145.299	102.102	91.1062	98.1748
GeoLmaxE	14.3178	12.3502	15.8947	16.1047	11.9261	9.5208	19.0991	17.6481	24.5153	20.8806	18.9737	19.9249	27.2061	27.7662	17.3355	15.7058	26.0192	24.7386	20.2506	21.6351	25.9114	26.1847	14.923	15.5916	9.68148	10.1253	20.6155	23.4002	13.6589	13.9284	15	17.4642	15.8241	16.5226	8.16228	8.7082	13.6015	11.4018	10.7703	10.9788
GeoLminE	14.3178	12.3299	15.879	15.3089	7.19251	9.17309	11.8227	13.7643	24.5153	20.8806	18.9737	19.9249	24.4167	21.1414	17.3211	15.6899	26.0192	24.7386	20.2012	21.5888	23.4607	25.8774	14.6355	15.5112	8.55751	10.1006	20.6155	23.0558	13.6406	13.9284	15	17.4642	15.7608	16.0311	7.85002	6.2316	13.6015	11.4018	10.7703	10.956
GeoFE	161.007	119.597	198.229	193.635	67.3704	68.5929	177.345	190.783	472.024	342.434	282.743	311.803	521.727	461.041	235.832	193.539	531.715	480.664	321.296	366.841	477.443	532.18	171.536	189.945	65.0698	80.324	333.794	423.729	146.332	152.367	176.715	239.546	195.879	208.033	50.3236	42.6204	145.299	102.102	91.1062	94.4701
GeoW1	1	1.00164	1.00099	1.05199	1.65813	1.03791	1.61546	1.28217	1	1	1	1	1.11424	1.31335	1.00083	1.00101	1	1	1.00245	1.00214	1.10446	1.01188	1.01965	1.00518	1.13134	1.00245	1	1.01494	1.00134	1	1	1	1.00402	1.03066	1.03978	1.39743	1	1	1	1.00208
GeoW2	0.115035	0.140122	0.15387	0.15297	0.131929	0.169275	0.134074	0.143274	0.118716	0.120676	0.13657	0.138612	0.132878	0.132714	0.14239	0.16328	0.124606	0.125959	0.138541	0.130854	0.151217	0.146711	0.162967	0.148659	0.170245	0.171942	0.149194	0.139835	0.166049	0.170214	0.137345	0.147265	0.155138	0.147265	0.170729	0.173635	0.128498	0.166936	0.134843	0.136725
GeoW6	0.0782423	0.078145	0.0549946	0.0553181	0.10287	0.091623	0.0631146	0.0594787	0.0528488	0.0589126	0.0592466	0.0531799	0.0383123	0.0397233	0.0540927	0.0545138	0.0437272	0.0445725	0.0508662	0.0525764	0.0376118	0.0374376	0.0578322	0.0620572	0.0957353	0.0871041	0.0426664	0.0406732	0.0759867	0.064039	0.0662524	0.0549437	0.0549303	0.0549437	0.118846	0.117847	0.0954318	0.078682	0.0945602	0.100175
GeoW3	109.24	89.6819	81.6688	82.1492	95.2508	74.2364	93.7273	87.7086	105.853	104.133	92.014	90.6589	94.5704	94.6876	88.2531	76.9621	100.849	99.7654	90.7049	96.0338	83.1018	85.6538	77.1101	84.5317	73.8133	73.0848	84.2286	89.8659	75.6787	73.8267	91.495	85.3314	81.0015	85.3314	73.6042	72.3722	97.7946	75.2768	93.1924	91.91
GeoW4	2.75983	2.62405	2.58984	2.58829	2.66017	2.47221	2.58502	2.60903	2.65419	2.69474	2.59105	2.6011	2.65221	2.65271	2.61481	2.53914	2.6873	2.68531	2.59812	2.59942	2.53397	2.56313	2.5122	2.61407	2.44663	2.51003	2.60379	2.61414	2.42017	2.46204	2.70713	2.60726	2.59835	2.62776	2.4055	2.48085	2.59395	2.49188	2.69379	2.58013
GeoW5	4.10069	2.59784	4.54456	5.28901	3.54675	2.70167	4.00396	6.3491	5.68542	6.55838	6.11595	8.15278	8.44996	7.74852	5.27432	5.62759	5.53389	4.9678	5.87317	5.21164	9.13378	10.0373	4.96856	5.70028	3.20765	4.81952	6.62698	6.84111	6.47001	5.56497	4.07599	7.62179	5.55058	4.56479	2.52466	2.98074	3.63094	5.47222	3.24904	2.72125
GeoW5b	0.148811	0.0725674	0.120778	0.164551	0.220691	0.13034	0.107595	0.256758	0.134684	0.226381	0.225331	0.327427	0.175004	0.157999	0.145646	0.193108	0.0916885	0.0776071	0.155379	0.12346	0.224263	0.260327	0.169086	0.233764	0.201745	0.380784	0.149887	0.136049	0.504349	0.271657	0.125861	0.324535	0.181229	0.116409	0.193149	0.269237	0.193879	0.388899	0.159943	0.127676
GeoW7	1.78973	1.72112	1.43848	1.32873	2.19265	1.61914	2.1011	1.74642	2.21951	2.0777	1.88795	1.80391	1.51863	1.48464	1.56461	1.41421	1.83071	1.76705	1.71001	1.82322	1.42613	1.49863	1.40549	1.56205	1.8081	1.69259	1.2664	1.35235	1.9799	1.61914	1.59	1.45033	1.33447	1.36492	2.136	2.23607	2.66747	1.61245	1.77063	2.23607
GeoRs	8.69304	7.13666	6.499	6.53723	7.57982	5.90755	7.45858	6.97963	8.42349	8.28668	7.32224	7.2144	7.52568	7.535	7.02296	6.12445	8.02528	7.93908	7.21806	7.64213	6.61303	6.81612	6.13623	6.72682	5.87387	5.8159	6.7027	7.1513	6.02232	5.87495	7.28094	6.79046	6.44589	6.79046	5.85724	5.7592	7.78225	5.99034	7.41602	7.31397
GeoRf	1.08333	1	1.15385	0.933333	0.454545	0.777778	0.526316	0.625	1.84615	1.81818	1.41667	1.46154	0.777778	0.703704	0.9375	0.866667	1.5625	1.41176	1	1.05882	0.76	0.84	1.16667	1.08333	0.777778	0.777778	1	0.913043	1.85714	1.18182	1.4	1.41667	0.928571	0.8125	0.857143	0.714286	2.16667	1.375	1.42857	1.42857
GeoRff	0.794391	0.792133	0.822195	0.91673	0.452692	0.759258	0.52281	0.585232	0.500809	0.533578	0.635054	0.634592	0.773077	0.696106	0.788928	0.804159	0.635445	0.685322	0.712482	0.583924	0.739051	0.728779	0.761043	0.703825	0.681918	0.671427	0.884117	0.832326	0.524681	0.67487	0.677289	0.687154	0.828801	0.798632	0.57338	0.549969	0.418868	0.672556	0.670482	0.602958
GeoRc	0.339167	0.374328	0.392263	0.391114	0.363221	0.41143	0.366161	0.378516	0.344551	0.347384	0.369554	0.372306	0.364525	0.364299	0.377346	0.404079	0.352996	0.354907	0.372211	0.361737	0.388866	0.383029	0.403691	0.385563	0.412608	0.414659	0.386256	0.373945	0.407491	0.41257	0.370601	0.383752	0.393875	0.383752	0.413194	0.416696	0.358466	0.408577	0.36721	0.369763
GeoRc1	11.9948	10.8817	14.7555	14.7123	8.51908	8.44402	13.7736	14.1386	17.4808	15.5536	14.5381	16.0769	22.7921	21.9962	15.5945	14.4503	20.6219	20.1219	16.8125	16.7366	21.7634	22.1978	13.6343	13.3034	8.05824	8.81292	19.3147	20.9283	10.28	12.0478	12.9641	15.0967	14.7123	15.0967	6.48204	6.48204	9.30485	9.90149	9.167	8.59348
GeoRc2	35.3655	29.0699	37.6163	37.6163	23.4543	20.5236	37.6163	37.3526	50.7349	44.7736	39.3397	43.1821	62.5256	60.3794	41.3268	35.7611	58.4196	56.6962	45.1691	46.2672	55.9663	57.9534	33.774	34.5038	19.53	21.2534	50.005	55.9663	25.2276	29.2018	34.9813	39.3397	37.3526	39.3397	15.6877	15.5558	25.9574	24.234	24.9639	23.2405
GeoRm	10.7936	9.68581	9.19725	9.2272	10.0126	8.72218	9.92416	9.5676	10.6093	10.5146	9.82386	9.74386	9.97319	9.97998	9.60035	8.89905	10.3316	10.2705	9.74658	10.0578	9.28632	9.44308	8.90856	9.37444	8.69443	8.64647	9.35583	9.69676	8.81616	8.69531	9.79329	9.42341	9.15551	9.42341	8.68069	8.59933	10.1587	8.79006	9.89295	9.81774
GeoRb	9.98566	9.33114	12.9524	12.9585	6.82873	7.25232	11.2438	11.8682	13.7402	12.4545	12.0751	13.2958	19.6342	18.975	13.4363	12.6478	17.278	16.9853	14.2872	13.779	18.9584	19.1475	11.9473	11.5276	6.87501	7.51302	17.0241	18.3288	8.45671	10.3458	11.1339	12.998	12.9611	13.2437	5.17935	5.28402	7.00894	8.4391	7.65302	6.67955
GeoRd	1.1221e+06	679600	1.51015e+06	1.46583e+06	346738	249695	1.49163e+06	1.51157e+06	3966576	2523893	1.74929e+06	2.49585e+06	8.10199e+06	6.76791e+06	2.03311e+06	1.33994e+06	6.3074e+06	5.74713e+06	2.7104e+06	2.96195e+06	6.0316e+06	6.8715e+06	1.05416e+06	1.08016e+06	224607	285020	3.84544e+06	5.54857e+06	484604	756254	1.04282e+06	1.70676e+06	1.35478e+06	1.65084e+06	138192	148339	543507	410957	439642	407456
GeoRh	0.982673	0.988833	0.996554	0.997843	0.968505	0.987823	0.976289	0.982871	0.967909	0.972835	0.981832	0.98038	0.99178	0.991878	0.991393	0.996088	0.983958	0.985862	0.988348	0.98137	0.994933	0.992608	0.996804	0.993578	0.987896	0.987687	0.998285	0.996624	0.977345	0.990303	0.990575	0.991136	0.998016	0.996674	0.968846	0.971472	0.954603	0.986924	0.981708	0.959362
GeoW8	0.912146	0.857201	0.866667	0.940269	0.454545	0.777778	0.532682	0.625	0.510174	0.55	0.705882	0.64849	0.899945	0.859524	0.811369	0.857143	0.64	0.708333	0.927213	0.585556	0.903226	0.745676	0.857143	0.923077	0.734707	0.777778	0.962963	0.929343	0.538462	0.777778	0.714286	0.705882	0.928571	0.882979	0.588653	0.714286	0.418953	0.709102	0.7	0.622404
GeoW9	1.25639	1.14907	1.14035	1.20386	0.964912	1.125	1.24663	1.01911	1.23099	1.15789	1.22892	1.2143	1.25224	1.25642	1.16461	1.15244	1.1976	1.28302	1.28001	1.2387	1.16667	1.16685	1.15068	1.1223	1.01749	1.03279	1.19795	1.18661	1.09639	1.10526	1.06061	1.13966	1.07059	1.14191	1.03233	1.06061	1.13932	1.06159	1.06061	1.17831
GeoW10	0.427793	0.485929	0.684021	0.730523	0.377292	0.509386	0.44419	0.454866	0.424994	0.440382	0.525875	0.505649	0.587205	0.56955	0.505099	0.723466	0.499907	0.498196	0.48203	0.462562	0.667681	0.648788	0.705319	0.617357	0.496642	0.530019	0.755756	0.711984	0.491395	0.614705	0.592952	0.615608	0.733238	0.714461	0.40051	0.318149	0.329211	0.539591	0.450171	0.206041
GeoSigR	1.14703	0.592184	0.355784	0.231239	1.06059	0.394743	2.13921	1.58293	5.00082	3.27267	1.85396	2.4175	2.0287	1.88622	0.974399	0.390887	3.26033	2.69716	1.56293	2.57819	1.14532	1.7398	0.293025	0.534986	0.369235	0.444023	0.310862	0.702767	1.105	0.657907	0.72903	0.940225	0.215561	0.359531	0.608534	0.545231	1.9414	0.585176	0.68489	1.40136
GeoW11	2.86381	2.51209	2.81139	1.26078	6.04536	2.21954	9.07923	7.08801	12.2383	9.61553	6.85673	7.28151	6.16616	8.29469	3.59503	3.04082	9.17936	7.7847	5.82249	9.00111	6.70992	6.82927	3.55236	4.52165	2.88081	3.28582	2.3893	3.9144	6.34166	4.52854	4.76482	5.46425	2.67973	3.27882	3.33213	3.6283	7.9043	3.66118	3.44031	4.29467
GeoW12	2.3299	2.54795	2.736	2.96943	1.86885	2.63529	1.64641	2.15068	1.59734	1.78824	1.88102	2.04534	2.21138	2.04027	2.63448	2.72199	2.10726	2.07843	2.16585	1.88034	2.25113	2.44164	2.64253	2.38627	2.4878	2.44	2.75765	2.52477	1.86517	2.35052	2.42202	2.34754	2.77551	2.70189	2.16393	2.03077	1.47027	2.464	2.42202	1.98291
GeoW13	0.12326	0.129925	0.0924643	0.0890162	0.193778	0.164635	0.127693	0.108841	0.102147	0.108503	0.113183	0.098152	0.0665837	0.0718281	0.0891591	0.0946596	0.0753873	0.0777944	0.0912093	0.0983332	0.0691127	0.0650629	0.101822	0.109815	0.177557	0.163934	0.0703602	0.0678641	0.160743	0.122179	0.111855	0.0975656	0.0920734	0.0909431	0.236674	0.244311	0.200022	0.145199	0.158186	0.186494
GeoW14	0.0418192	0.0527174	0.04326	0.0490564	0.0422995	0.0714594	0.0216333	0.0314648	0.0162892	0.0216855	0.0250291	0.0256632	0.0203505	0.0186874	0.0386755	0.0438347	0.0209225	0.0210039	0.026741	0.0217297	0.0218897	0.0242425	0.044439	0.0390824	0.068683	0.061	0.0334414	0.0270373	0.0349501	0.0421893	0.0410099	0.033605	0.0443302	0.0414939	0.0692659	0.0629715	0.0270241	0.0550967	0.0579968	0.0458299
GeoW15	0.933583	1.02391	1.05924	1.03111	1.31412	1.10482	1.00241	1.16982	1.0153	1.06678	0.942831	1.026	0.91059	0.932958	1.06299	1.07749	1.05558	0.965364	0.967668	1.02502	0.969614	1.06644	1.10525	1.07928	1.16136	1.15677	0.992857	0.965559	1.13157	1.10865	1.1383	1.08751	1.06597	1.07695	1.20133	1.17537	1.11731	1.16621	1.14985	1.0468
GeoM2x	11.6327	8.74321	15.8187	13.7135	2.5177	3.96397	6.99464	8.30297	38.9206	28.6664	20.6701	26.0719	25.7246	23.5485	13.9328	11.1588	40.8831	36.9313	19.9369	20.7682	24.6521	27.6167	12.7831	13.4855	3.56248	4.14888	23.7702	26.1202	10.9929	12.0918	14.6155	19.4177	12.6264	12.7829	2.33242	2.08999	12.056	8.52994	7.64578	8.71344
GeoM2y	8.74822	7.06625	11.9215	13.6774	8.57125	5.52551	20.9543	19.5488	9.63707	8.37366	9.40833	11.029	43.0003	40.2814	18.228	15.6006	18.591	18.8548	18.4896	19.8044	36.6255	37.3987	10.9847	9.65509	5.19569	6.34292	23.3739	29.9419	4.33822	7.23246	7.75499	10.7661	14.7537	16.2914	4.12856	4.11754	2.92474	4.71985	4.19123	3.28656
GeoM2xy	1.44608	1.26361	-1.08461	-0.889412	0.431517	0.557398	1.62029	1.14889	-1.17014	1.23247	-3.36805	-4.05239	3.12922	1.33524	-2.34242	-1.65422	4.35536	4.03265	-5.83333	-8.95448	1.8081	7.7059	1.7713	2.53398	-0.896963	-1.62134	-1.66721	-1.92185	-1.91726	-2.07456	-1.12569	-0.0634812	-1.62796	-0.678474	1.35905	1.21028	-2.41306	-1.4397	-0.919881	-1.59572
GeoEr	4.19983	3.72218	4.95445	4.92618	3.06574	2.88396	4.887	4.91617	6.38805	5.60434	5.08932	5.65633	7.76149	7.4791	5.31463	4.86278	7.18145	6.96528	5.78574	5.90534	7.34614	7.55205	4.58383	4.51104	2.76581	3.0273	6.46457	7.03799	3.624	4.11373	4.42556	5.14182	4.92624	5.07069	2.342	2.30696	3.52317	3.40083	3.20091	3.1925
GeoEr2	20.3809	15.8095	27.7402	27.3909	11.089	9.48948	27.9489	27.8518	48.5576	37.04	30.0784	37.1009	68.7249	63.8299	32.1608	26.7595	59.4741	55.7861	38.4265	40.5725	61.2776	65.0154	23.7678	23.1406	8.75817	10.4918	47.1441	56.0621	15.3311	19.3243	22.3705	30.1838	27.3801	29.0742	6.46097	6.20753	14.9808	13.2498	11.837	12
GeoEl	1.13397	1.08792	1.81964	1.83076	0.730822	0.838643	1.48918	1.60005	1.86685	1.64852	1.61708	1.83078	2.89531	2.8474	1.85127	1.81436	2.43049	2.36546	2.00915	1.89603	2.92145	2.90429	1.71821	1.57681	0.7685	0.892396	2.55758	2.70861	1.08623	1.39966	1.4851	1.83313	1.90432	1.86392	0.509952	0.492201	0.760608	1.05399	0.808661	0.691992
GeoEl2	2.38938	2.15054	5.61988	5.75882	1.08772	1.375	3.79195	4.31847	5.77083	4.60526	4.42771	5.53202	13.6078	13.2816	5.73298	5.56098	9.52994	9.06604	6.68468	5.91818	13.8737	13.5891	5.08219	4.33813	1.15686	1.5082	10.802	12.1192	2.09639	3.36842	3.87121	5.72626	6.22353	5.97207	0.606061	0.545455	1.11765	2.01299	1.31818	0.948276
GeoNc	39	32	41	41	26	23	41	41	55	49	43	47	67	64	45	39	63	61	49	49	60	62	37	38	22	24	54	60	28	32	38	43	41	43	18	18	29	27	28	26
GeoNv	9	10	16	15	9	10	14	12	15	14	11	15	16	15	14	18	13	15	16	11	15	19	10	13	11	11	17	16	11	16	13	16	12	13	10	11	11	11	10	11
GeoNl	39	32	41	41	26	23	41	41	55	49	43	47	67	64	45	39	63	61	49	49	60	62	37	38	22	24	54	60	28	32	38	43	41	43	18	18	29	27	28	26
GeoNsz	32	38	39	35	18	22	39	26	42	33	31	27	56	55	41	33	63	69	44	43	42	42	33	31	19	14	46	59	15	23	34	24	36	43	15	13	23	18	21	22
GeoNi	5	7	6	7	3	5	5	4	4	3	3	4	7	7	7	5	7	10	5	4	4	6	5	4	4	3	6	10	2	4	6	4	5	6	3	2	4	5	5	4
GeoNx	3	5	4	5	1	3	3	2	2	1	1	2	5	5	5	3	5	8	3	2	2	4	3	2	2	1	4	8	0	2	4	2	3	4	1	0	2	3	3	2
GeoNo	0	0	0	0	0	0	0	0	0	0	0	0	0	0	0	0	0	0	0	0	0	0	0	0	0	0	0	0	0	0	0	0	0	0	0	0	0	0	0	0
GeoXo	-1.72566	0.795699	0.494152	0.4	0.219298	0.517857	-0.0838926	-0.0955414	-2.93333	-0.931579	0.349398	1.02709	-0.340686	-0.221053	-0.712042	0.134146	-3.3024	-2.8239	1	-0.595455	0.580645	0.447028	0.205479	-0.71223	-0.578431	0.311475	-0.687713	-0.616279	-0.415663	-0.0175439	0.242424	-0.388268	0.00588235	0.0586592	0.30303	0.69697	0.367647	-0.668831	-0.924242	-1.89655
GeoYo	-1.23894	-0.209677	0.0321637	-0.129412	-0.587719	0.285714	-0.426175	-2.10828	0.145833	-0.205263	0.0361446	-0.475369	0.796569	0.873684	-0.89267	-1.05488	-0.889222	-0.238994	0.220721	1.28636	0.196237	1.09432	-0.136986	-0.280576	0.813725	0.0737705	0.136519	-0.00290698	0.0903614	0	0.159091	0.268156	-0.247059	0.304469	0.515152	0.893939	-0.176471	0.357143	0.242424	0.258621
GeoXYo	2.12435	0.822862	0.495198	0.420413	0.6273	0.591446	0.434353	2.11044	2.93696	0.953925	0.351262	1.13177	0.866365	0.901215	1.14187	1.06337	3.42002	2.83399	1.02407	1.4175	0.612909	1.1821	0.246956	0.765503	0.998365	0.320092	0.701133	0.616286	0.425371	0.0175439	0.289965	0.471869	0.247129	0.310068	0.597669	1.13353	0.407807	0.758212	0.955507	1.9141
_Area	113	93	171	170	57	56	149	157	240	190	166	203	408	380	191	164	334	318	222	220	372	387	146	139	51	61	293	344	83	114	132	179	170	179	33	33	68	77	66	58
_MinNorm	-5077	-2582	22773	27107	21772	17376	-907	-3929	-1017	222	167	161	179	222	2861	3176	340	700	-398	-112	23109	24078	2127	3309	1684	1601	2778	1958	302	237	1272	1460	2863	1380	443	1357	1883	881	-12	84
_MaxNorm	67400	69414	62726	60757	69583	71494	80486	81079	7817	7573	658	644	1289	1258	6804	6748	9845	9744	16041	15893	59214	58671	10495	9766	11388	10980	10811	10957	1219	1210	4291	4195	23100	23758	7501	7010	6436	6572	3935	3570
Mean	31161.9	33415.6	42749.9	43932.5	45677.9	44435.6	39789.5	38575	3400.1	3897.56	413.024	402.931	734.429	740.508	4833.11	4962.32	5093.09	5222.62	7821.47	7890.3	41162.3	41375.1	6311.3	6537.92	6536.63	6291.26	6794.86	6458.07	761.096	724	2782.14	2828	12981.7	12569.6	3972.52	4183.76	4160.16	3726.87	1961.68	1827.79
Variance	145918460	143987720	44339010	31452128	63497615	81356595	184031380	200735790	2.16843e+06	1.50108e+06	6681.34	6496.68	34201.2	29799.9	431907	354324	2509610	2.27183e+06	7.50796e+06	7.11637e+06	36210964	33240000	1945318	1.15842e+06	2.61587e+06	2.44344e+06	1.7927e+06	2.24935e+06	23383.5	26329.2	253255	207785	11375549	13910501	1.38345e+06	887540	575987	899580	433057	337616
Skewness	0.555233	0.375054	-0.270522	0.464886	0.503973	0.312366	-0.306655	-0.205671	-0.114285	-0.427275	-0.0192055	0.144582	-0.0697474	-0.142418	0.0483452	0.0755574	0.12389	0.174944	-0.135532	-0.0759948	-0.522753	-0.249956	-1.02887	-0.581665	-0.337218	0.123173	-0.031102	0.0136183	0.581658	0.501006	0.134552	0.301309	-0.0716375	-0.211695	0.0115756	0.416767	0.656428	0.204211	0.222699	0.300369
Kurtosis	-0.158979	-0.33704	1.46341	0.635146	-0.237252	-0.401755	-0.815681	-1.08196	-1.38232	-0.962422	0.113738	-0.0463819	0.104369	-0.144198	-0.299615	-0.142644	-0.193317	-0.0470443	-0.489077	-0.516309	1.1561	0.808631	0.693135	0.00373743	-0.747875	-1.13651	-0.0804447	-0.506938	0.513212	0.108561	-0.691094	-0.220371	-0.822763	-0.754914	-0.554218	0.0328166	-0.072033	0.22177	-0.846586	-0.574727
Perc.01%	9268	9268	21352	32151	31096	25306	9769	12972	993	1397	217	234	292	309	3349	3552	1932	2070	2083	2399	22933	25237	2130	3913	2724	3174	3815	3503	438	438	1913	1985	6303	4567	1806	2241	2786	1398	844	844
Perc.10%	17816	18791	35411	36880	36850	33218	20199	17460	1342	1910	300	297	489	517	3945	4203	2919	3175	3750	3871	33879	34317	4180	4986	4621	4536	5014	4353	599	511	2101	2177	8127	7076	2209	3146	3284	2609	1054	998
Perc.50%	29616	31844	42671	43711	44071	43788	40910	40380	3561	4147	419	405	741	743	4840	4922	5108	5227	7765	7838	41458	41447	6628	6666	6577	5855	6872	6617	747	708	2772	2823	13113	12781	4050	4053	4074	3681	1859	1799
Perc.90%	48394	50529	50696	50853	57190	57190	56864	56721	5172	5306	518	499	952	950	5757	5776	7173	7227	11492	11492	48140	48686	7774	7788	8465	8404	8363	8197	978	927	3497	3493	17128	17128	5488	5488	5329	5100	2884	2467
Perc.99%	59695	65536	59523	59523	65536	65536	63837	63837	5803	5966	618	599	1151	1109	6391	6391	8982	8982	13163	13163	54204	54472	8512	8512	9031	9031	9964	9865	1207	1161	3836	4093	19716	19716	6492	6492	6356	6356	3403	3284
_Area_S(1,0)	200	160	312	308	90	92	258	280	452	356	306	378	760	704	348	296	630	596	408	404	692	722	266	252	82	102	546	640	150	204	242	332	310	324	50	50	122	136	114	98
S(1,0)AngScMom	0.0077	0.00765625	0.00486933	0.00427981	0.0158025	0.0153592	0.00597921	0.00579082	0.00539392	0.00539705	0.00461361	0.00428319	0.00247576	0.00242526	0.00401308	0.00461103	0.00347191	0.00365975	0.004109	0.00435006	0.0029027	0.00264347	0.00644468	0.00595238	0.0124926	0.0101884	0.00315314	0.00307617	0.00835556	0.00615148	0.00618127	0.00417332	0.00489074	0.00464868	0.02	0.02	0.00954045	0.00951557	0.0110803	0.0131195
S(1,0)Contrast	32.69	41.4875	69.0962	80.9545	36.1778	60.9783	47.1473	40.6357	16.9867	23.4663	42.3791	41.8307	70.0895	79.4403	71.092	90.7905	38.3873	37.7617	57.8676	60.396	69.0549	77.8837	48.3383	73.5397	64.2683	70.2941	60.3516	45.1719	43.9333	40.8725	53.0579	81.0602	54.9742	45.1481	130.08	129.6	87.623	56.2941	20.807	34.0204
S(1,0)Correlat	0.852202	0.801168	0.630425	0.630323	0.829096	0.687392	0.746685	0.800648	0.920291	0.887547	0.791911	0.797389	0.644088	0.598914	0.658187	0.559858	0.810729	0.818214	0.709733	0.6988	0.642775	0.599244	0.741483	0.599658	0.683234	0.65868	0.702973	0.782398	0.80389	0.819826	0.760333	0.631365	0.721887	0.771843	0.37973	0.403148	0.588735	0.716538	0.902899	0.823973
S(1,0)SumOfSqs	110.59	104.328	93.4805	109.494	105.842	97.5315	93.0605	101.919	106.555	104.338	101.829	103.229	98.4646	99.0316	103.993	103.138	101.408	103.863	99.6801	100.259	96.6547	97.1709	93.4917	91.8461	101.445	102.974	101.593	103.795	112.012	113.425	110.691	109.947	98.8342	98.941	104.858	108.57	106.529	99.2974	107.141	96.634
S(1,0)InvDfMom	0.202095	0.14782	0.172583	0.129864	0.234769	0.241816	0.1385	0.160242	0.297363	0.234358	0.163002	0.153244	0.135915	0.124637	0.12736	0.119125	0.206311	0.212352	0.142317	0.143326	0.13847	0.146386	0.188469	0.17212	0.106403	0.103043	0.166086	0.172145	0.133399	0.14994	0.180266	0.149679	0.157559	0.17553	0.0329913	0.0394499	0.142384	0.0853706	0.194235	0.209767
S(1,0)SumAverg	66.97	68.1125	65.6987	64.7468	66.0889	66.9348	68.5891	67.35	66.5	66.5674	65.9477	66.4762	66.3474	66.7642	66.2299	66.8716	66.7429	66.594	67.3775	67.2871	66.2399	66.3213	67.5714	68.1111	69.0488	69.0784	66.8132	66.8531	66.5467	66.0686	65.8843	66.1446	67.671	67.7037	69.36	68.96	67	66.3235	62.5263	61.1224
S(1,0)SumVarnc	409.669	375.825	304.826	357.02	387.192	329.148	325.095	367.042	409.232	393.886	364.938	371.085	323.769	316.686	344.878	321.761	367.245	377.691	340.853	340.64	317.564	310.8	325.628	293.845	341.51	341.602	346.02	370.007	404.114	412.829	389.706	358.726	340.363	350.616	289.35	304.678	338.492	340.895	407.758	352.516
S(1,0)SumEntrp	1.65009	1.59695	1.71022	1.73807	1.50604	1.50076	1.68124	1.69698	1.7493	1.71752	1.77828	1.78401	1.81395	1.80608	1.76457	1.74602	1.83537	1.80903	1.77846	1.74803	1.78849	1.78587	1.65588	1.66011	1.50445	1.52158	1.80248	1.82159	1.61762	1.72293	1.75648	1.77025	1.71186	1.76684	1.30161	1.32569	1.51512	1.55743	1.56037	1.54275
S(1,0)Entropy	2.16028	2.14107	2.34892	2.39911	1.84885	1.86563	2.27275	2.29476	2.35632	2.31966	2.38092	2.42638	2.66669	2.66739	2.43213	2.37972	2.53393	2.52612	2.44702	2.43196	2.603	2.64146	2.24488	2.26937	1.90647	1.9968	2.55962	2.58902	2.10983	2.23657	2.25876	2.41459	2.35732	2.37998	1.69897	1.69897	2.03701	2.05602	1.98426	1.9175
S(1,0)DifVarnc	11.6219	11.9211	30.1937	30.3969	14.4	29.7642	16.3405	15.421	7.36575	9.25593	14.6275	14.2821	24.3492	27.0836	23.5295	30.098	17.081	17.3301	21.691	23.1981	28.0727	32.0496	21.6568	32.6203	19.2802	20.1899	24.3516	18.0343	14.7733	13.3615	20.9155	29.1508	21.4837	18.262	26.8544	32.7744	33.9253	17.0476	6.17975	12.9354
S(1,0)DifEntrp	1.06031	1.07739	1.1976	1.24492	1.05955	1.14792	1.12181	1.09987	0.954291	1.01485	1.12785	1.11712	1.22638	1.24733	1.2352	1.27671	1.08442	1.09038	1.18321	1.19268	1.21634	1.24819	1.11019	1.20179	1.1669	1.12977	1.19641	1.141	1.07827	1.08202	1.17034	1.24879	1.16245	1.12878	1.1871	1.17211	1.17144	1.10765	0.946191	1.05644
_Area_S(0,1)	198	162	310	310	102	94	276	290	430	338	296	366	772	720	350	300	616	586	408	398	704	730	262	250	86	106	546	644	138	200	232	322	312	330	52	54	108	130	110	94
S(0,1)AngScMom	0.00765228	0.00845908	0.00470343	0.004641	0.0119185	0.0129018	0.00551355	0.00615933	0.00495403	0.00479675	0.00454255	0.00422527	0.00265443	0.00272762	0.00409796	0.00522222	0.00315188	0.00345956	0.00380863	0.00377516	0.00295794	0.00280353	0.00550667	0.005248	0.0127096	0.011392	0.00334769	0.0030429	0.00808654	0.00635	0.00553656	0.00449443	0.00456114	0.00459137	0.0221893	0.0205761	0.0133745	0.00946746	0.0107438	0.01177
S(0,1)Contrast	31.8384	30.5802	67.329	78.5032	72.7451	49	31.558	24.3448	33.0233	49.1243	49.4527	64.4426	42.9301	43.65	43.1314	53.4533	48.0649	51.6519	67.9706	80.7889	57.0227	65.3973	58.4733	66.832	55.0465	58.717	41.4908	33.7578	63.3913	49.29	35.6207	45.3851	50.4038	38.2545	37.0385	54.7407	70.4259	69.4462	83.1636	93.1915
S(0,1)Correlat	0.850932	0.860343	0.647571	0.644544	0.668439	0.757029	0.839506	0.881744	0.839837	0.743127	0.76009	0.687989	0.777507	0.785112	0.796098	0.752146	0.754299	0.735515	0.654179	0.566666	0.709147	0.667849	0.669563	0.681758	0.73077	0.710609	0.799314	0.836166	0.72403	0.785992	0.835778	0.788902	0.737661	0.808375	0.835481	0.758312	0.669837	0.660038	0.566481	0.526109
S(0,1)SumOfSqs	106.791	109.484	95.5213	110.426	109.701	100.835	98.3152	102.933	103.093	95.6196	103.065	103.27	96.475	101.565	105.765	107.832	97.812	97.6463	98.2742	93.2178	98.0266	98.4451	88.4787	105.002	102.229	101.449	103.373	103.024	114.852	115.159	108.453	107.498	96.0661	99.8164	112.566	113.247	106.653	102.138	95.917	98.3259
S(0,1)InvDfMom	0.185711	0.200689	0.168171	0.164595	0.0917666	0.0945841	0.19952	0.25633	0.203995	0.14468	0.171431	0.145939	0.163137	0.164979	0.157618	0.140101	0.156956	0.160234	0.165429	0.158562	0.185428	0.168308	0.145409	0.149807	0.0922753	0.0968204	0.19399	0.208375	0.11401	0.135216	0.187183	0.161448	0.146663	0.171269	0.103125	0.0813387	0.181849	0.142696	0.116725	0.110549
S(0,1)SumAverg	67.3131	67.321	66.4	65.1355	65.6863	65.8511	67.3406	67.0069	67.693	68.0828	66.277	67.0874	66.3549	66.3111	66.0457	65.9333	67.4545	67.3857	67.2451	68.0553	66.0852	66.1973	67.8015	67.024	68.5814	68.4906	66.5897	66.6708	67.4493	66.15	65.6552	65.6708	67.7628	67.2485	67.3462	67.5556	67.1296	67.5692	60.6909	60.8085
S(0,1)SumVarnc	395.326	407.354	314.756	363.201	366.058	354.34	361.703	387.386	379.348	333.354	362.808	348.637	342.97	362.609	379.929	377.876	343.183	338.933	325.126	292.082	335.084	328.383	295.442	353.175	353.871	347.08	372	378.339	396.016	411.348	398.191	384.606	333.86	361.011	413.226	398.247	356.187	339.107	300.504	300.112
S(0,1)SumEntrp	1.6598	1.61565	1.71161	1.72357	1.50978	1.49107	1.70296	1.73876	1.73743	1.70442	1.72509	1.75207	1.81659	1.82937	1.78603	1.72829	1.79915	1.78199	1.75638	1.74079	1.77621	1.79914	1.65106	1.69219	1.45488	1.48422	1.81516	1.81238	1.59294	1.71661	1.70111	1.76703	1.77197	1.78228	1.29919	1.36447	1.45857	1.58589	1.53093	1.52636
S(0,1)Entropy	2.16741	2.11471	2.37143	2.37579	1.94367	1.90908	2.32418	2.28949	2.38788	2.38148	2.37516	2.42114	2.639	2.63164	2.4219	2.33107	2.57656	2.53928	2.46563	2.46899	2.60671	2.63919	2.30627	2.31183	1.9065	1.9699	2.54282	2.5771	2.10498	2.2235	2.28308	2.38396	2.38413	2.3949	1.66969	1.69895	1.90657	2.05024	1.98666	1.9411
S(0,1)DifVarnc	11.3605	11.155	28.004	33.3101	19.5409	12.7442	12.083	10.3727	10.9551	14.5304	19.277	24.6079	14.7521	15.2648	15.4939	18.8789	18.8769	20.0928	30.1843	37.1227	24.0908	27.5326	22.2898	25.872	16.4911	18.5262	16.3441	13.7029	20.8582	16.2275	12.3151	16.1177	17.0458	12.5834	10.8713	14.1591	29.1334	27.6947	19.7441	25.742
S(0,1)DifEntrp	1.0285	1.03469	1.17866	1.24233	1.17493	1.0556	1.06768	1.02411	1.07619	1.14754	1.1461	1.20425	1.14159	1.14318	1.1194	1.15877	1.14039	1.16105	1.21668	1.23642	1.19891	1.22328	1.17152	1.19318	1.0689	1.09583	1.13164	1.09143	1.14672	1.10058	1.07681	1.12853	1.15394	1.09866	0.95637	0.945437	1.17157	1.19039	1.11501	1.17163
_Area_S(1,1)	186	150	300	298	86	86	252	268	426	328	294	362	748	696	338	290	600	570	400	400	678	702	248	234	80	100	532	628	140	198	226	312	300	314	42	42	110	128	102	92
S(1,1)AngScMom	0.00653255	0.00764444	0.00457778	0.00427909	0.0135208	0.0137912	0.00554296	0.00579194	0.00426503	0.00490779	0.00478967	0.00425811	0.00242	0.00240289	0.00427156	0.00451843	0.00303889	0.00286242	0.0039625	0.0036375	0.00273666	0.0025568	0.00598335	0.00573453	0.0153125	0.0112	0.00286195	0.00282466	0.00826531	0.0063769	0.00524708	0.00402696	0.00471111	0.00458436	0.0249433	0.0249433	0.0102479	0.00854492	0.0101884	0.012051
S(1,1)Contrast	48.7527	55.6533	103.193	137.785	48.4419	69.8372	83.2222	60.2463	49.385	64.25	73.9728	84.105	97.3824	113.167	102.018	126.028	77.51	75.8667	62.76	78.69	106.885	108.017	114.21	125.077	72.525	88.02	95.0226	73.6783	85.8429	65.202	95.4248	125.173	79.26	60.8408	189.81	217.524	105.836	56.2656	77.1569	92.087
S(1,1)Correlat	0.783067	0.750034	0.478326	0.365026	0.760548	0.630311	0.554868	0.696237	0.756293	0.659101	0.647983	0.591603	0.498001	0.424745	0.514096	0.404409	0.58943	0.609576	0.679029	0.587561	0.420781	0.441384	0.331772	0.32761	0.629761	0.577938	0.523668	0.636101	0.614387	0.714736	0.554192	0.407412	0.588787	0.691061	0.138969	0.0820814	0.503993	0.732458	0.611579	0.543582
S(1,1)SumOfSqs	112.368	111.322	98.906	108.497	101.152	94.4539	93.4805	99.1667	101.32	94.2362	105.07	102.97	96.9946	98.3622	104.977	105.8	94.3933	97.1593	97.7658	95.396	92.2664	96.6828	85.4571	93.0092	97.9436	104.274	99.744	101.235	111.307	114.284	107.025	105.616	96.3735	98.4673	110.222	118.488	106.688	105.153	99.3211	100.88
S(1,1)InvDfMom	0.137289	0.121764	0.10072	0.096867	0.121507	0.12866	0.130809	0.122855	0.139665	0.111874	0.12545	0.111344	0.120572	0.109642	0.101448	0.0878334	0.109235	0.11083	0.155169	0.124362	0.105484	0.0994424	0.141904	0.110435	0.1775	0.139004	0.12107	0.132172	0.142283	0.193846	0.101401	0.0986077	0.182533	0.194278	0.0716207	0.0858676	0.0875143	0.130213	0.0834344	0.0886724
S(1,1)SumAverg	67.6559	68.4533	65.7933	64.8188	66.3023	66.3023	69.1746	68.1866	68.0704	68.5793	66.3946	67.2873	66.7567	67.1494	67.0473	66.7034	68.1833	67.7754	67.63	67.81	66.649	66.4444	68.4516	68.2564	69.475	69.38	67.2632	67.3153	67.4143	66.3131	66.3628	66.7244	68.4467	68.2038	70.6667	70.381	66.3455	65.6719	60.098	60.9565
S(1,1)SumVarnc	400.72	389.634	292.431	296.202	356.164	307.978	290.7	336.42	355.896	312.695	346.307	327.774	290.596	280.282	317.891	297.174	300.063	312.771	328.303	302.894	262.181	278.714	227.619	246.96	319.249	329.076	303.953	331.26	359.386	391.932	332.674	297.289	306.234	333.029	251.079	256.426	320.917	364.345	320.128	311.433
S(1,1)SumEntrp	1.68754	1.64014	1.69419	1.71072	1.38488	1.38488	1.70248	1.69374	1.75658	1.68938	1.74005	1.75449	1.78555	1.78134	1.69551	1.70186	1.76322	1.77791	1.75042	1.75629	1.76304	1.77374	1.61421	1.63134	1.4044	1.54539	1.7682	1.79305	1.62315	1.68047	1.70193	1.73026	1.73321	1.73599	1.20754	1.23621	1.54188	1.62034	1.54074	1.47779
S(1,1)Entropy	2.20478	2.13194	2.37723	2.39641	1.88549	1.87849	2.29384	2.29982	2.4319	2.37155	2.35722	2.42461	2.67403	2.67586	2.41623	2.37986	2.57303	2.595	2.44436	2.4756	2.62307	2.65001	2.26757	2.27785	1.83536	1.96388	2.58582	2.6176	2.10418	2.21761	2.29816	2.41937	2.36019	2.37801	1.60891	1.60891	2.00308	2.07899	1.9968	1.93107
S(1,1)DifVarnc	17.0061	18.362	39.9378	49.753	13.2742	24.6663	30.1406	20.481	17.0607	21.2836	26.7656	29.7042	34.9555	38.8504	33.2946	40.3694	27.9953	27.6982	23.1959	29.8299	41.6519	40.5994	54.0221	53.7683	29.9494	31.1684	38.0371	28.5662	33.3839	27.3609	32.1308	44.0577	34.5485	26.6518	45.8095	61.8685	35.5815	19.7009	20.7597	25.2741
S(1,1)DifEntrp	1.11762	1.14184	1.27346	1.3214	1.09631	1.13901	1.22865	1.18948	1.15302	1.18985	1.2167	1.24611	1.30168	1.32805	1.29619	1.33739	1.23526	1.22744	1.20968	1.24385	1.31092	1.31542	1.26631	1.3006	1.11461	1.21414	1.27021	1.24055	1.23317	1.19775	1.24976	1.33652	1.24311	1.18336	1.20754	1.16805	1.23929	1.12788	1.17278	1.20614
_Area_S(1,-1)	184	154	298	296	86	88	258	274	420	330	280	352	746	692	332	284	606	576	386	378	686	718	258	242	76	92	528	624	132	190	222	314	294	312	50	50	100	122	102	84
S(1,-1)AngScMom	0.00714792	0.00826446	0.0048196	0.00420015	0.01298	0.0131715	0.00543838	0.00522138	0.00443311	0.00501377	0.00512755	0.00382554	0.00244737	0.00237228	0.00439106	0.00458738	0.00297901	0.00311656	0.00393299	0.00405924	0.00269021	0.00257602	0.00597921	0.00601052	0.0145429	0.0118147	0.00322113	0.00280449	0.0104454	0.0066482	0.00584368	0.00458436	0.00465084	0.00470496	0.0248	0.0248	0.012	0.00913733	0.0117263	0.0138889
S(1,-1)Contrast	73.1848	79.6234	119.617	122.919	119.395	122.864	54.8682	58.3285	42.6952	67.9939	80.0214	102.955	89.3137	87.6503	96.2651	113.683	69.3993	68.9583	138.477	137.661	94.0875	113.56	61.6279	95.7025	124.026	148.717	67.2765	57.9712	106.409	86.2947	67.0811	89.7134	103.32	83.4359	114.32	137.92	137.1	144.311	119.118	129.452
S(1,-1)Correlat	0.659728	0.614109	0.340497	0.443638	0.471226	0.458452	0.725669	0.71414	0.792912	0.638366	0.58888	0.473068	0.547196	0.567608	0.550331	0.461658	0.64907	0.64504	0.278392	0.278958	0.532952	0.424811	0.683643	0.460325	0.392715	0.288262	0.677448	0.723189	0.564322	0.621358	0.69385	0.585734	0.448859	0.571805	0.429687	0.378739	0.359472	0.305582	0.407247	0.331605
S(1,-1)SumOfSqs	107.539	103.168	90.6876	110.467	112.898	113.438	100.004	102.023	103.085	94.0094	97.3213	97.6924	98.6228	101.355	107.04	105.586	98.8793	97.1353	95.9501	95.4601	100.726	98.7153	97.4023	88.6668	102.115	104.475	104.288	104.713	122.119	113.953	109.556	108.28	93.7326	97.4275	100.226	111	107.021	103.908	100.478	96.8383
S(1,-1)InvDfMom	0.158964	0.14313	0.100707	0.0811683	0.0998772	0.104796	0.113173	0.162006	0.180172	0.13889	0.139948	0.117169	0.106603	0.107467	0.111725	0.10995	0.174762	0.156223	0.136519	0.128417	0.141095	0.12273	0.13088	0.114895	0.10827	0.107207	0.147908	0.166468	0.12968	0.11696	0.167745	0.14927	0.114465	0.133904	0.11846	0.128589	0.151211	0.126224	0.085874	0.0777801
S(1,-1)SumAverg	68.75	68.7403	65.9664	64.6351	66.186	66.5	67.7209	67.6861	67.9333	68.4909	66.1214	67.6932	66.5737	66.5	66.1807	66.6972	67.4917	67.3542	67.886	67.9683	65.965	66.1894	67.6434	68.6116	69.3421	70.7609	66.7235	66.9071	67.5303	66.6947	66.2883	65.6242	68.8299	68.2436	68.24	68.4	67.66	67.918	60.2941	59.1667
S(1,-1)SumVarnc	356.97	333.049	243.133	318.948	332.198	330.886	345.147	349.763	369.643	308.044	309.264	287.815	305.178	317.77	331.895	308.662	326.118	319.583	245.324	244.179	308.815	281.301	327.981	258.965	284.436	269.182	349.874	360.879	382.067	369.517	371.142	343.407	271.611	306.274	286.582	306.08	290.984	271.321	282.796	257.901
S(1,-1)SumEntrp	1.63526	1.59512	1.69097	1.71479	1.44617	1.48777	1.65398	1.69222	1.72229	1.68029	1.667	1.73585	1.77894	1.79142	1.76337	1.74334	1.78282	1.76087	1.71703	1.69567	1.74878	1.73123	1.63829	1.65941	1.45303	1.43853	1.80089	1.82168	1.53211	1.65802	1.73462	1.72581	1.67443	1.7267	1.34978	1.27753	1.48813	1.54957	1.53339	1.46367
S(1,-1)Entropy	2.17647	2.11516	2.35448	2.39807	1.89949	1.89659	2.29899	2.32071	2.42286	2.36843	2.32297	2.45415	2.6776	2.6777	2.41119	2.37008	2.58643	2.56964	2.45904	2.44048	2.63388	2.64624	2.27099	2.26623	1.84913	1.93761	2.5543	2.61435	2.01223	2.20348	2.26771	2.38619	2.36796	2.36873	1.62672	1.62672	1.95184	2.05182	1.95692	1.88303
S(1,-1)DifVarnc	27.9153	29.8934	38.8589	34.9649	41.2991	52.9132	19.7924	25.3289	15.0577	22.3291	31.7189	39.1362	30.2753	28.5915	34.7466	43.572	33.0022	29.1983	63.4254	63.4646	35.741	44.4709	21.6149	34.3198	38.7071	48.2821	27.5006	25.5323	42.1664	30.4388	25.0066	34.2725	42.3311	33.5344	36.88	47.2896	56.4596	65.0723	31.6401	35.5471
S(1,-1)DifEntrp	1.20258	1.20717	1.3046	1.31801	1.25173	1.19277	1.12294	1.16014	1.12977	1.20798	1.23689	1.29335	1.27811	1.28185	1.28541	1.30132	1.18105	1.20752	1.33641	1.3354	1.29387	1.30608	1.20308	1.27806	1.19455	1.19817	1.21955	1.17188	1.2554	1.24764	1.1837	1.28088	1.25768	1.23378	1.06669	1.12864	1.24216	1.30115	1.2537	1.2317
_Area_S(2,0)	174	136	284	278	68	74	222	246	426	332	280	350	704	650	314	264	594	558	374	368	640	672	240	226	64	82	506	592	134	180	220	306	280	290	34	34	108	118	96	80
S(2,0)AngScMom	0.00746466	0.00832612	0.00476096	0.0047099	0.0181661	0.0153397	0.00624949	0.00578359	0.0044083	0.00489911	0.00441327	0.00406531	0.00240509	0.00249941	0.00470607	0.00467746	0.00318562	0.00315386	0.00413223	0.00386933	0.00275879	0.00259974	0.00628472	0.00626517	0.0166016	0.01279	0.00297614	0.00272211	0.00846514	0.00654321	0.00623967	0.00444274	0.00451531	0.00473246	0.0294118	0.0294118	0.010631	0.0101982	0.0110677	0.014375
S(2,0)Contrast	101.345	142.015	160.162	182.273	76.9412	110.541	106.018	98.0894	48.8498	61.3795	112.036	111.926	147.869	169.92	160.204	187.667	98.1919	88.6272	154.07	164.332	141.722	150.685	119.142	149.478	157.5	191.707	155.055	118.838	138.746	127.822	105.182	184	140.221	118.007	334.824	296.059	213.204	138.051	53.0625	83.4
S(2,0)Correlat	0.564771	0.302331	0.112591	0.176462	0.646593	0.463673	0.405418	0.502458	0.765186	0.690876	0.41331	0.444935	0.231348	0.143066	0.208413	0.0973793	0.513054	0.561518	0.213768	0.170218	0.245493	0.202591	0.327548	0.160505	0.121492	0.0676642	0.241868	0.410721	0.390556	0.457535	0.530971	0.180194	0.300391	0.380765	-0.308789	-0.15463	-0.0117571	0.255074	0.751267	0.532429
S(2,0)SumOfSqs	116.427	101.778	90.2414	110.665	108.856	103.053	89.1534	98.574	104.018	99.2798	95.4811	100.822	96.1875	99.1441	101.192	103.957	100.824	101.061	97.9797	99.0208	93.9169	94.4838	88.5875	89.0284	89.6406	102.81	102.261	100.833	113.83	117.816	112.127	112.222	100.214	95.2845	127.913	128.205	105.363	92.6608	106.666	89.1844
S(2,0)InvDfMom	0.154066	0.0593959	0.0926301	0.070094	0.184503	0.16313	0.113276	0.100663	0.16137	0.139702	0.0950009	0.0982676	0.0997753	0.0895083	0.102861	0.0925939	0.170685	0.173039	0.126523	0.127639	0.122583	0.0995568	0.103509	0.0833146	0.0331369	0.031341	0.113422	0.132248	0.0811774	0.0926195	0.168774	0.0812959	0.105413	0.12354	0.0115285	0.0205691	0.105751	0.138252	0.140693	0.123057
S(2,0)SumAverg	68.5402	71.0735	65.6549	64.2734	65.5294	65.9459	69.6216	68.1707	67.6197	67.7289	66.6357	67.5829	66.9886	67.3908	67.2357	67.6212	67.4848	67.1935	68.0802	68.1902	66.6031	66.2976	68.6583	68.9646	70.75	71.3171	67.419	67.9324	68.1493	67.0444	66.3818	66.5621	68.5214	69	69.4118	67.9412	67.537	65.8136	60.9375	58.25
S(2,0)SumVarnc	364.363	265.098	200.803	260.386	358.484	301.673	250.596	296.207	367.222	335.74	269.889	291.363	236.881	226.657	244.562	228.16	305.105	315.618	237.849	231.752	233.946	227.251	235.208	206.636	201.062	219.534	253.99	284.495	316.575	343.442	343.327	264.887	260.635	263.131	176.83	216.761	208.249	232.592	373.6	273.337
S(2,0)SumEntrp	1.66688	1.54684	1.64934	1.67511	1.38313	1.43188	1.63538	1.67764	1.71239	1.71997	1.68776	1.73338	1.73106	1.71473	1.68004	1.63308	1.7844	1.78365	1.69106	1.68393	1.72147	1.71244	1.60958	1.62121	1.36635	1.45485	1.74608	1.7744	1.58622	1.62716	1.67492	1.69207	1.66893	1.67618	1.11084	1.1242	1.4564	1.50618	1.5338	1.41008
S(2,0)Entropy	2.15751	2.0937	2.36511	2.35901	1.77939	1.82855	2.24192	2.27771	2.42039	2.36993	2.38156	2.42534	2.68182	2.657	2.3804	2.35375	2.5638	2.5626	2.434	2.4562	2.61986	2.64888	2.24782	2.24217	1.78737	1.89913	2.5749	2.61388	2.08667	2.20176	2.24251	2.38241	2.37295	2.35805	1.53148	1.53148	1.98883	2.02086	1.96346	1.85794
S(2,0)DifVarnc	36.7919	35.7429	66.9443	67.0586	31.1799	50.7918	36.1224	33.9593	19.8518	23.1037	40.8744	40.1122	52.1409	60.8621	56.0858	65.6646	44.4635	38.9222	60.0729	66.6011	59.3095	56.7792	55.0083	60.9847	41.9375	51.1981	65.5922	47.9596	43.4654	40.2958	48.522	69.104	55.4499	47.5627	71.2388	63.9446	79.2445	50.8342	17.8086	30.11
S(2,0)DifEntrp	1.25222	1.26249	1.35129	1.38307	1.15059	1.13603	1.27131	1.26115	1.1443	1.19154	1.27584	1.31306	1.38239	1.39944	1.37285	1.38813	1.30201	1.27074	1.38726	1.39797	1.36022	1.38046	1.27031	1.32287	1.09491	1.23265	1.37958	1.33876	1.28596	1.28425	1.273	1.39821	1.34702	1.31841	1.1242	1.15962	1.35402	1.28181	1.11349	1.15484
_Area_S(0,2)	170	138	278	280	90	78	254	266	380	296	260	326	730	680	318	272	564	536	374	360	664	686	232	222	70	90	506	602	112	172	204	286	284	302	40	42	82	108	88	72
S(0,2)AngScMom	0.00775087	0.00871666	0.00491693	0.00464286	0.0150617	0.0144642	0.00533201	0.00531404	0.0048892	0.00497626	0.00526627	0.00410253	0.00237193	0.00230104	0.00419287	0.00478482	0.00269101	0.00272889	0.00397495	0.00390432	0.00266276	0.00256696	0.00624257	0.00612775	0.0146939	0.0116049	0.00310894	0.00275935	0.00972577	0.00716604	0.00586313	0.00440119	0.00473616	0.00421034	0.03	0.0249433	0.0133849	0.0108025	0.0123967	0.0146605
S(0,2)Contrast	111.059	93.4348	154.597	188.536	200.622	147.538	98.937	74.6015	108.995	148.709	108.215	177.601	112.841	116.421	106.547	128.566	126.589	128.672	164.963	180.928	134.837	150.802	157.905	139.928	176.257	192.311	108.229	91.701	158.446	116.488	90.2451	126.448	144.479	113.007	106.65	169.905	163.439	202.13	278.886	265.75
S(0,2)Correlat	0.498632	0.582226	0.140605	0.141145	0.133807	0.190939	0.473263	0.623653	0.46079	0.192445	0.413	0.130672	0.398443	0.416703	0.502704	0.409349	0.336791	0.322974	0.131068	0.0104584	0.269639	0.196365	0.0107288	0.319106	0.141459	0.110769	0.457418	0.541857	0.339409	0.49693	0.590918	0.419475	0.25502	0.418565	0.474472	0.257845	0.225166	0.0529216	-0.29892	-0.194583
S(0,2)SumOfSqs	110.756	111.824	89.9453	109.76	115.807	91.1788	93.915	99.1127	101.069	92.0739	92.1767	102.149	93.7909	99.7952	107.127	108.834	95.4365	95.0271	94.9226	91.42	92.3088	93.8248	79.8088	102.753	102.649	108.133	99.7353	100.079	119.928	115.778	110.302	108.908	96.9683	97.1791	101.469	114.467	105.467	106.712	107.353	111.231
S(0,2)InvDfMom	0.132424	0.10867	0.106459	0.104609	0.0787219	0.079215	0.114403	0.145414	0.113623	0.0650204	0.104283	0.0819914	0.0856614	0.0815307	0.0941263	0.092454	0.0962758	0.100767	0.133884	0.125018	0.101837	0.0872215	0.0815361	0.0710881	0.0610538	0.0873087	0.0908181	0.0973549	0.0783384	0.118709	0.0883976	0.0820056	0.0752938	0.0797323	0.141856	0.0766883	0.0799364	0.0742852	0.0372328	0.0458381
S(0,2)SumAverg	68.9882	68.8551	66.8993	65.3214	64.7111	66.0513	68.7795	68.3008	69.6053	69.7365	66.0308	68.1779	67.1315	67.0853	66.6981	67.125	68.8156	68.5	67.6578	68.5944	66.5542	66.5569	68.9224	66.6126	70.9429	70.6667	67.2253	67.4817	68.9464	67.5116	65.8333	66.8392	69.0141	68.3974	68.65	69.5238	66.9024	67.9444	58.7955	60.3611
S(0,2)SumVarnc	331.965	353.863	205.184	250.504	262.605	217.177	276.723	321.849	295.281	219.586	260.491	230.993	262.322	282.76	321.959	306.771	255.157	251.437	214.728	184.752	234.398	224.498	161.33	271.084	234.34	240.222	290.712	308.615	321.265	346.622	350.962	309.184	243.394	275.71	299.228	287.964	258.43	224.719	150.526	179.175
S(0,2)SumEntrp	1.57245	1.56276	1.65683	1.65871	1.42072	1.42125	1.67949	1.70266	1.68114	1.62719	1.63115	1.6584	1.76912	1.77893	1.722	1.68897	1.73937	1.73753	1.67542	1.66572	1.71135	1.7123	1.53949	1.59017	1.44086	1.44748	1.74609	1.79095	1.43762	1.59048	1.70163	1.71041	1.69682	1.73721	1.22946	1.19672	1.48977	1.47028	1.33476	1.35972
S(0,2)Entropy	2.14191	2.0788	2.34168	2.35953	1.86059	1.8535	2.3106	2.31227	2.37502	2.34718	2.31885	2.42593	2.67729	2.68086	2.41059	2.35543	2.61621	2.60222	2.44606	2.44381	2.63705	2.64624	2.24347	2.25548	1.8365	1.94086	2.55627	2.60926	2.02234	2.16988	2.2506	2.38634	2.35208	2.40722	1.54185	1.60891	1.88445	1.98325	1.91712	1.84061
S(0,2)DifVarnc	44.0116	31.9601	65.641	79.0344	53.4044	40.2301	35.8159	28.6066	35.1252	43.0922	42.4807	71.7512	36.6975	38.4101	36.0506	43.9532	45.3331	44.6895	70.6546	78.1307	50.7728	55.9239	63.8486	43.8526	48.8898	62.8573	38.0141	33.2115	49.3186	41.2428	28.884	40.7233	46.1619	33.3126	40.2275	54.0862	56.997	90.3186	66.6544	75.1566
S(0,2)DifEntrp	1.26917	1.23887	1.34469	1.3799	1.25268	1.19034	1.27317	1.21642	1.28848	1.35204	1.27399	1.37479	1.32768	1.32883	1.30522	1.32154	1.32346	1.34224	1.3815	1.39921	1.37383	1.38195	1.32169	1.33932	1.21832	1.27001	1.31603	1.27824	1.30049	1.29257	1.26402	1.32863	1.35652	1.30563	1.07895	1.13938	1.2767	1.28065	1.33028	1.3493
_Area_S(2,2)	148	118	260	258	60	60	210	224	372	278	256	318	680	632	296	252	534	508	358	362	614	630	208	192	60	78	480	568	114	168	190	268	262	272	20	22	86	102	78	68
S(2,2)AngScMom	0.00821768	0.00919276	0.00497041	0.0048675	0.02	0.0183333	0.0060771	0.00510204	0.00374321	0.00514984	0.00509644	0.00411376	0.00231401	0.00230332	0.00431428	0.00497606	0.00280548	0.00280551	0.00390125	0.00396813	0.0026048	0.00256488	0.00661058	0.00678168	0.0177778	0.013478	0.0028559	0.00266564	0.00923361	0.00715703	0.00603878	0.00423257	0.00489482	0.00473075	0.05	0.053719	0.0121687	0.011534	0.0141354	0.0155709
S(2,2)Contrast	144.486	162.949	189.9	238.457	131.867	167.633	193.524	148.402	141.914	155.432	130.078	188.17	169.053	197.212	177.236	219.762	162.873	155.031	153.525	186.42	144.143	152.908	194.154	183.781	150.933	208.641	185.363	152.937	198.035	145.881	196.811	255.209	166.069	130.279	324.4	289.273	194.558	124.196	238.308	232.971
S(2,2)Correlat	0.398887	0.3193	0.00500627	-0.0885526	0.412161	0.219461	-0.00924192	0.20875	0.296067	0.16235	0.348008	0.0908235	0.119578	0.0234098	0.149056	-0.0147742	0.131608	0.195811	0.179232	0.0150161	0.220178	0.204759	-0.11134	-0.108273	0.171202	0.0680649	0.0735831	0.217093	0.162302	0.374266	0.121683	-0.169218	0.182274	0.336749	-0.432989	-0.390071	-0.0514228	0.295541	-0.14461	-0.0780084
S(2,2)SumOfSqs	120.182	119.692	95.4277	109.53	112.162	107.383	95.8758	93.7768	100.801	92.7784	99.7543	103.484	96.0068	100.97	104.141	108.281	93.7783	96.39	93.5253	94.6309	92.4207	96.1393	87.3512	82.9134	91.0556	111.94	100.043	97.6722	118.202	116.568	112.038	109.137	101.543	98.2127	113.19	104.05	92.5214	88.1499	104.1	108.056
S(2,2)InvDfMom	0.0912491	0.0700902	0.107975	0.0760603	0.0392429	0.0671858	0.0929558	0.0835902	0.105743	0.10287	0.088394	0.0947403	0.0942606	0.0857939	0.094168	0.102289	0.086162	0.0890477	0.0978668	0.0798882	0.09769	0.0901991	0.0832857	0.0837945	0.124419	0.101728	0.100975	0.113441	0.0754217	0.15566	0.065519	0.0412645	0.115991	0.127282	0.0147913	0.0162646	0.0685513	0.0830632	0.0314644	0.0373541
S(2,2)SumAverg	69	70.1017	65.6538	64.5039	66.1333	67.0333	69.9619	68.9911	69.9677	69.9065	66.6719	68.5849	67.1412	67.4146	67.8716	67.7143	69.2097	68.3307	68.6425	68.7403	66.5212	66.4381	67.8654	67.5521	70.6667	71.1026	67.4958	68.2676	68.5614	67.5476	66.5368	67.7164	68.8626	68.9559	67.8	65.2727	65.7674	65.2941	58.5641	60.7353
S(2,2)SumVarnc	336.243	315.82	191.811	199.661	316.782	261.899	189.98	226.705	261.289	215.682	268.939	225.765	214.974	206.667	239.328	213.363	212.241	230.528	220.576	192.104	225.539	231.649	155.251	147.872	213.289	239.118	214.808	237.752	274.773	320.391	251.343	181.337	240.103	262.572	128.36	126.926	175.527	228.404	178.092	199.253
S(2,2)SumEntrp	1.58938	1.56156	1.62524	1.64443	1.41692	1.31657	1.57852	1.65325	1.69269	1.57587	1.64457	1.67294	1.72692	1.72811	1.70193	1.66996	1.71105	1.7249	1.66039	1.64371	1.7114	1.74039	1.5199	1.52977	1.32149	1.4463	1.7028	1.7383	1.53665	1.59349	1.59018	1.58945	1.651	1.66779	1	0.856536	1.44617	1.43738	1.42504	1.41855
S(2,2)Entropy	2.11024	2.04637	2.33449	2.34218	1.71795	1.74805	2.25985	2.30724	2.46492	2.33767	2.32238	2.4158	2.68209	2.67874	2.39857	2.32973	2.59814	2.59146	2.44076	2.43767	2.62828	2.6396	2.22178	2.20017	1.75808	1.87666	2.5768	2.62419	2.04106	2.17155	2.23834	2.3877	2.33614	2.35376	1.30103	1.28769	1.9205	1.95548	1.86122	1.8148
S(2,2)DifVarnc	55.0051	55.3525	78.3539	80.5557	30.5289	42.9389	67.229	44.2525	50.5368	54.1325	41.6006	71.8285	58.5557	68.3608	57.8661	75.3807	58.4044	54.874	51.8421	62.1159	56.5045	57.6751	78.1775	58.8541	46.8933	59.0493	75.3748	59.0378	82.7553	66.1616	65.4065	83.8726	67.438	53.4593	81.04	77.7025	63.642	43.5486	52.2301	55.4542
S(2,2)DifEntrp	1.31537	1.2896	1.36249	1.42438	1.10957	1.16094	1.38389	1.34337	1.35998	1.33991	1.33522	1.4078	1.415	1.43981	1.4057	1.45691	1.39696	1.39094	1.38783	1.40082	1.36555	1.38582	1.37129	1.34967	1.20865	1.24357	1.40323	1.38827	1.3208	1.33023	1.38328	1.44868	1.38301	1.33246	0.939794	0.931927	1.28158	1.2177	1.30736	1.24147
_Area_S(2,-2)	150	128	254	252	64	66	218	234	362	282	232	298	680	628	286	242	550	522	328	318	628	662	224	208	52	64	474	564	98	152	184	270	252	268	36	34	66	92	72	56
S(2,-2)AngScMom	0.0072	0.00866699	0.00489801	0.00494457	0.0166016	0.0160698	0.00643885	0.00562495	0.00421233	0.00538202	0.0052393	0.00414396	0.00240484	0.00248996	0.0045968	0.00529335	0.00321322	0.00325891	0.00423855	0.00472687	0.00261167	0.00251914	0.00589923	0.00596339	0.0207101	0.0166016	0.00333814	0.00283562	0.0118701	0.00753116	0.00708885	0.00485597	0.00488158	0.00490087	0.029321	0.0311419	0.0183655	0.012051	0.0150463	0.0184949
S(2,-2)Contrast	218.613	242.172	187.307	217.333	188.75	178.061	95.6606	111.855	115.818	173.418	125.836	202.631	144.935	138.825	175.797	202.645	126.2	130.667	206.518	171.635	173.172	184.707	112.634	173.125	266.808	273.625	113.101	97.5993	254.98	179.461	130.457	184.733	196.913	166.403	272.111	328.882	208.121	208.565	327.694	303.786
S(2,-2)Correlat	0.0710046	-0.0916621	-0.0718037	-0.0260627	-0.00034159	0.0284002	0.468697	0.429838	0.412148	0.0318563	0.284302	-0.0774634	0.262523	0.308548	0.171481	0.0464988	0.332403	0.30712	-0.119082	0.0319768	0.121742	0.0449076	0.415956	0.057229	-0.248824	-0.19774	0.429095	0.514408	0.0536282	0.233097	0.444054	0.179941	-0.0486245	0.0935371	-0.341836	-0.457273	-0.00645677	-0.0233268	-0.384085	-0.289528
S(2,-2)SumOfSqs	117.661	110.919	87.3794	105.906	94.3428	91.6327	90.0245	98.0902	98.5093	89.5623	87.9115	94.0314	98.2643	100.386	106.091	106.263	94.5182	94.2924	92.2713	88.6524	98.5883	96.6958	96.4258	91.8171	106.824	114.226	99.0544	100.495	134.714	117.003	117.328	112.634	93.891	91.787	101.395	112.842	103.393	101.905	118.379	117.79
S(2,-2)InvDfMom	0.0652685	0.073333	0.0783449	0.0603475	0.0184708	0.028819	0.0972184	0.107447	0.138257	0.113631	0.0808079	0.0712088	0.109582	0.105441	0.0979962	0.101648	0.113791	0.10713	0.100447	0.116876	0.0907027	0.102952	0.108238	0.0888552	0.0620043	0.0405309	0.0996651	0.125603	0.114972	0.0930474	0.126248	0.0913307	0.0882926	0.0914734	0.0847685	0.0854015	0.0863513	0.0719548	0.0674522	0.0917638
S(2,-2)SumAverg	71.0933	70.8906	64.8661	65.0952	63.0625	63.8788	68.1743	68.1795	69.7735	70.1418	65.0948	68.1879	66.8412	67.2006	66.8601	67.4215	68.0109	67.7318	67.4817	67.0189	66.1274	66.284	67.8304	68.9712	67.8846	69.6875	66.8481	67.2021	68.8571	67.3026	66.5435	66.7481	68.8016	68.6119	66.4444	67.4706	65.3939	65.8261	59.6944	60.6429
S(2,-2)SumVarnc	252.031	201.504	162.21	206.293	188.621	188.47	264.438	280.506	278.219	184.831	225.81	173.495	248.122	262.721	248.568	222.409	251.873	246.503	162.567	182.974	221.181	202.076	273.069	194.143	160.487	183.277	283.116	304.381	283.878	288.553	338.857	265.803	178.651	200.745	133.469	122.484	205.451	199.057	145.823	167.372
S(2,-2)SumEntrp	1.60303	1.58147	1.60615	1.58766	1.32872	1.33366	1.60656	1.65181	1.69596	1.61721	1.64239	1.63284	1.76296	1.7657	1.67917	1.61581	1.723	1.71581	1.60912	1.62496	1.69367	1.69202	1.55887	1.59116	1.32235	1.32872	1.72509	1.78813	1.49361	1.57171	1.59287	1.65549	1.60209	1.61749	1.12148	1.15962	1.35879	1.43359	1.39948	1.33965
S(2,-2)Entropy	2.15201	2.07428	2.34084	2.33329	1.78737	1.8013	2.23069	2.28043	2.42769	2.32477	2.30061	2.4035	2.67522	2.65891	2.3695	2.29923	2.55421	2.53742	2.40068	2.3694	2.62773	2.6512	2.25684	2.2457	1.69285	1.78737	2.52997	2.59778	1.94208	2.13827	2.18135	2.34326	2.33987	2.34277	1.53958	1.51377	1.76705	1.93107	1.83225	1.73744
S(2,-2)DifVarnc	80.9422	85.531	67.1717	77.8685	47.7344	59.0523	30.0357	45.787	39.9064	59.0347	45.9188	75.804	55.2433	50.1412	68.5371	84.3565	50.3517	49.3215	84.308	67.5696	64.4548	69.5501	42.9412	63.0768	88.6879	79.3711	44.6379	40.0655	93.8451	60.4784	44.6928	66.3267	78.1719	62.1802	85.3333	127.91	71.3021	66.6446	79.6319	93.5357
S(2,-2)DifEntrp	1.33563	1.36878	1.40901	1.36662	1.22506	1.1877	1.24453	1.26823	1.32066	1.40542	1.28038	1.41425	1.38264	1.37178	1.37449	1.39083	1.31618	1.33888	1.42194	1.39263	1.40397	1.43093	1.30004	1.37591	1.2035	1.25807	1.30498	1.28728	1.38742	1.31322	1.26228	1.38596	1.39665	1.37608	1.02114	1.15962	1.25977	1.31835	1.37644	1.29664
_Area_S(3,0)	148	118	256	248	46	58	186	212	402	308	256	322	650	598	280	232	560	522	340	332	590	622	214	202	48	64	466	544	118	160	198	280	250	258	20	20	94	100	82	66
S(3,0)AngScMom	0.00721329	0.00904912	0.00558472	0.0048127	0.0245747	0.0196195	0.0068216	0.00574048	0.0039603	0.00524962	0.00476074	0.0043594	0.00244734	0.00241049	0.00461735	0.00557372	0.00276148	0.00299467	0.00365052	0.00391929	0.00286125	0.00263128	0.00615774	0.00646995	0.0208333	0.015625	0.00307613	0.00262219	0.00876185	0.00679687	0.00612182	0.00446429	0.0048	0.00531819	0.05	0.05	0.0119964	0.0132	0.0139798	0.0160698
S(3,0)Contrast	182.703	259.915	193.82	226.815	86.6522	118.966	162.484	152.34	76.2239	85.0584	149.938	153.211	139.72	163.746	169.25	201.776	127.843	114.728	194.776	196.44	149.359	163.685	143.85	174.376	203.917	225.625	196.339	162.93	249.559	202.537	136.859	199.129	194.272	171.109	385.2	205.7	300.277	163.56	73.7317	121.394
S(3,0)Correlat	0.258501	-0.102608	-0.0292831	-0.0296043	0.633688	0.445866	0.0845496	0.226777	0.621379	0.553723	0.199981	0.258701	0.270877	0.154962	0.117525	0.072421	0.354305	0.403894	-0.025412	-0.0415161	0.183469	0.118693	0.169856	0.0581858	-0.0630657	-0.0490469	0.0406289	0.163683	-0.0350779	0.149125	0.406915	0.111313	0.0337197	0.0815301	-0.507514	-0.117358	-0.384059	0.100552	0.630061	0.29127
S(3,0)SumOfSqs	123.198	117.864	94.1531	110.146	118.276	107.344	88.7453	98.5095	100.66	95.2977	93.7087	103.34	95.8138	96.8867	95.8951	108.765	98.9963	96.2311	94.9747	94.3047	91.4597	92.8648	86.6419	92.5747	95.9097	107.538	102.327	97.4093	120.551	119.017	115.379	112.035	100.526	93.1487	127.76	92.0475	108.477	90.9224	99.6539	85.6419
S(3,0)InvDfMom	0.0685981	0.0310785	0.0978147	0.0747149	0.199265	0.18424	0.111821	0.120106	0.148582	0.15109	0.0957519	0.116879	0.0904636	0.0813286	0.0817169	0.0910931	0.120987	0.122518	0.0973345	0.0908744	0.106672	0.104651	0.127365	0.113169	0.0598936	0.0484546	0.0793819	0.086664	0.0401084	0.0536956	0.110992	0.0861228	0.0892436	0.0948221	0.0880261	0.0871648	0.0199953	0.050048	0.102013	0.0742928
S(3,0)SumAverg	69.8649	71.678	65.5703	63.8952	65.2609	64.069	70.2258	68.434	68.4428	68.526	66.5938	67.8571	67.1477	67.2977	67.75	67.4655	67.5214	67.3257	67.6471	67.6928	66.6678	66.3215	68.486	68.396	69.1667	69.3125	66.9657	68.2757	69.3898	67.3625	66.697	66.7571	68.096	69.0465	63.6	58.1	67.1702	64.48	60.5122	57.0909
S(3,0)SumVarnc	310.09	211.54	182.792	213.771	386.454	310.409	192.497	241.698	326.416	296.132	224.897	260.147	243.535	223.801	214.33	233.283	268.142	270.197	185.122	180.779	216.479	207.774	202.717	195.922	179.722	204.527	212.969	226.707	232.645	273.531	324.656	249.012	207.831	201.486	125.84	162.49	133.631	200.13	324.884	221.174
S(3,0)SumEntrp	1.63728	1.5373	1.61763	1.59366	1.2832	1.33783	1.56833	1.6315	1.72136	1.66736	1.66879	1.69893	1.74559	1.73736	1.62915	1.64333	1.73621	1.72483	1.63653	1.63451	1.68778	1.70839	1.55925	1.59139	1.22023	1.36635	1.70706	1.73423	1.54115	1.60575	1.67898	1.68763	1.61214	1.57828	1	1	1.42218	1.4611	1.41994	1.34054
S(3,0)Entropy	2.14992	2.05147	2.29238	2.33619	1.62349	1.72191	2.19262	2.27023	2.45556	2.34386	2.34239	2.39705	2.65994	2.65535	2.36598	2.28568	2.60301	2.56336	2.46242	2.43861	2.59936	2.6292	2.24177	2.21892	1.68124	1.80618	2.55077	2.61357	2.06168	2.17778	2.23281	2.37725	2.33773	2.31185	1.30103	1.30103	1.9347	1.91117	1.86976	1.8013
S(3,0)DifVarnc	54.4624	58.6602	76.4028	81.0673	38.862	54.9655	61.4057	53.8434	30.2406	32.0714	55.1794	58.7231	50.3157	61.3233	50.5957	63.5107	55.5929	47.123	76.8624	77.9447	55.1707	59.9202	67.3289	70.7801	55.8889	63.0625	80.5688	61.5282	62.0086	58.2373	56.9458	76.8682	70.2615	62.3996	160.2	91.21	98.8782	52.0464	24.0464	44.1671
S(3,0)DifEntrp	1.33571	1.37581	1.41233	1.43694	1.06391	1.10947	1.34697	1.35058	1.24846	1.25887	1.37676	1.37671	1.37177	1.38817	1.36496	1.3792	1.33708	1.32016	1.42017	1.42089	1.38192	1.39551	1.30204	1.35449	1.14497	1.24542	1.40783	1.40228	1.36781	1.37886	1.32349	1.41177	1.39181	1.38461	1	0.856864	1.3558	1.21563	1.15221	1.22419
_Area_S(0,3)	142	116	248	250	78	64	232	242	330	254	224	286	688	640	288	244	514	488	340	324	624	644	204	194	56	74	466	560	86	144	174	250	256	274	30	32	56	86	68	50
S(0,3)AngScMom	0.00882761	0.00951249	0.0051704	0.004832	0.0147929	0.0180664	0.00579667	0.00570316	0.00416896	0.00523901	0.0057398	0.00471906	0.00228586	0.0023584	0.00487076	0.00574442	0.00274039	0.00273784	0.00403114	0.0043629	0.00273258	0.00262336	0.00663206	0.00658944	0.0178571	0.014244	0.00307613	0.00283801	0.0132504	0.00916281	0.0070683	0.004608	0.00482178	0.00474186	0.0377778	0.03125	0.0184949	0.0135208	0.016436	0.02
S(0,3)Contrast	206.366	151.103	164.315	237.592	285.154	241.781	162.569	126.397	180.406	225.528	114.179	209.531	164.006	170.438	154.514	181.762	176.35	173.775	205.059	189.58	165.808	184.388	202.078	163.959	292.893	306.297	145.609	133.054	156.256	143.986	126.54	183.976	213.062	174.657	127.067	235.062	229.536	272.651	435.676	374.2
S(0,3)Correlat	0.129825	0.324795	0.00840978	-0.0534864	-0.239061	-0.342912	0.116376	0.336897	0.112009	-0.202995	0.326623	-0.0642103	0.133127	0.152049	0.289671	0.161282	0.0606652	0.0788451	-0.0803946	-0.0761414	0.0765279	0.0150337	-0.223543	0.147033	-0.335454	-0.291655	0.238393	0.309376	0.315568	0.377131	0.443539	0.171879	-0.0644393	0.0985995	0.312773	-0.151044	0.00587506	-0.241778	-0.718319	-0.568973
S(0,3)SumOfSqs	118.577	111.894	82.854	112.765	115.069	90.0212	91.9899	95.307	101.581	93.7359	84.7805	98.4446	94.5962	100.5	108.762	108.357	93.8697	94.3243	94.9	88.0833	89.7741	93.6013	82.5792	96.1109	109.66	118.568	95.5935	96.3285	114.15	115.583	113.701	111.08	100.082	96.8809	92.4489	102.108	115.446	109.783	126.774	119.25
S(0,3)InvDfMom	0.136417	0.0801968	0.0980022	0.0776442	0.049399	0.05834	0.0955457	0.112349	0.0840813	0.0523914	0.0965657	0.0906147	0.0764579	0.0764353	0.112602	0.114234	0.0723016	0.0702182	0.101277	0.0993654	0.0889834	0.0835343	0.0949624	0.077016	0.060453	0.0595239	0.104685	0.108323	0.095139	0.0997934	0.0961658	0.0769651	0.0643781	0.0563503	0.0425843	0.0489254	0.089901	0.102163	0.0637186	0.0774384
S(0,3)SumAverg	70	69.2069	66.5565	65.752	63.4615	66.5938	69.3793	69.0579	70.3697	69.7795	65.5536	67.8392	67.3721	67.5375	66.9167	68.4016	69.2062	68.5779	67.1882	67.6667	66.7115	66.6677	68.3922	65.7732	70.5357	70.8378	67.1288	67.8107	68.0698	68.375	65.7356	68.216	68.875	68.3942	67.0667	69.5625	65.4643	66.5581	61.1471	64.2
S(0,3)SumVarnc	267.944	296.474	167.102	213.466	175.12	118.304	205.391	254.831	225.918	149.416	224.944	184.247	214.379	231.561	280.535	251.667	199.129	203.523	174.541	162.753	193.289	190.017	128.238	220.485	145.749	167.974	236.765	252.261	300.344	318.345	328.263	260.345	187.266	212.867	242.729	173.371	232.249	166.479	71.4196	102.8
S(0,3)SumEntrp	1.57516	1.53369	1.59805	1.64379	1.43669	1.33582	1.60993	1.61118	1.66245	1.55239	1.61376	1.6232	1.72585	1.74015	1.67375	1.62748	1.6906	1.69719	1.63435	1.60852	1.67485	1.6684	1.44481	1.50737	1.29664	1.34438	1.70202	1.74218	1.48817	1.57338	1.63024	1.6836	1.62662	1.628	1.09582	1.16649	1.40415	1.37959	1.29894	1.30161
S(0,3)Entropy	2.08445	2.03332	2.31251	2.33832	1.84578	1.75914	2.27206	2.28055	2.40994	2.31118	2.26961	2.36215	2.69001	2.66974	2.35534	2.28743	2.59527	2.59186	2.43362	2.39902	2.61825	2.64195	2.22031	2.20401	1.74819	1.85296	2.54916	2.59789	1.89249	2.07056	2.17566	2.35218	2.34532	2.35645	1.43698	1.50515	1.73744	1.88549	1.79709	1.69897
S(0,3)DifVarnc	89.9695	46.9227	60.2416	87.5785	94.1473	73.5928	53.0419	42.848	58.6047	68.3905	41.9286	86.0574	56.1842	57.414	58.0924	70.4771	55.4358	52.8647	82.2403	70.7433	60.2189	66.8476	88.7186	54.2493	83.6773	92.5055	50.6097	46.7627	41.3175	43.151	42.1961	61.9177	63.3826	47.6424	34.9067	64.4336	77.7181	134.178	127.364	127.082
S(0,3)DifEntrp	1.35702	1.33319	1.38104	1.4253	1.25241	1.25807	1.37078	1.33876	1.38508	1.43241	1.29414	1.39233	1.40477	1.417	1.34123	1.37333	1.40769	1.40509	1.42021	1.4024	1.40416	1.42581	1.39799	1.37355	1.25891	1.31184	1.37793	1.36177	1.23702	1.25456	1.34233	1.41498	1.39583	1.37691	0.960255	1.0536	1.28853	1.29303	1.34104	1.1871
_Area_S(3,3)	114	88	220	220	36	38	172	180	318	230	220	276	612	568	254	214	470	448	316	324	550	560	170	154	40	58	428	512	88	138	156	228	224	230	6	6	62	78	60	48
S(3,3)AngScMom	0.0104648	0.012655	0.00607438	0.00541322	0.0277778	0.0263158	0.00709843	0.00691358	0.00437087	0.00544423	0.00595041	0.00454211	0.00259516	0.00265944	0.00452601	0.00593938	0.00299683	0.0032386	0.00468675	0.00426764	0.0029686	0.00323342	0.00747405	0.00826446	0.025	0.0208086	0.00325356	0.00275421	0.012655	0.00861164	0.00747863	0.00569406	0.00566008	0.00529301	0.166667	0.166667	0.0176899	0.0151216	0.0172222	0.0234375
S(3,3)Contrast	214.474	211.318	165.873	245.764	298	277	278.047	236.7	197.245	210.53	143.527	198.754	189.435	202.856	204.15	236.383	182.145	169.804	208.177	241.173	163.68	175.779	222.482	181.779	167.15	291.828	176.752	161.359	247.432	198.884	268.654	295.535	183.768	145.304	108	129.667	258.355	216.282	334.867	338
S(3,3)Correlat	0.0942779	0.00940925	0.0563227	-0.0508851	-0.10913	-0.263985	-0.323339	-0.25234	0.0254858	-0.0877758	0.261729	0.0212032	0.0214196	-0.0133216	0.0515914	-0.054651	0.00327369	0.105882	-0.123258	-0.256369	0.1259	0.0828829	-0.146544	0.0160115	-0.0267909	-0.333781	0.108183	0.141018	-0.0860946	0.151706	-0.179526	-0.283593	0.10253	0.215178	-0.533123	-0.794005	-0.203051	-0.192695	-0.438238	-0.4953
S(3,3)SumOfSqs	118.399	106.663	87.8864	116.932	134.34	109.574	105.055	94.5031	101.202	96.7711	97.205	101.53	96.7905	100.094	107.627	112.067	91.3715	94.9559	92.6667	95.9801	93.6278	95.8321	97.023	92.3686	81.3944	109.399	99.0968	93.9248	113.909	117.226	113.882	115.12	102.381	92.5716	35.2222	36.1389	107.375	90.6695	116.416	113.021
S(3,3)InvDfMom	0.0572641	0.107917	0.0618676	0.059177	0.0403001	0.0372445	0.068984	0.0617108	0.074468	0.0745312	0.0648166	0.0666339	0.0817684	0.0856047	0.064362	0.0539951	0.0555847	0.0518193	0.071626	0.0638618	0.105509	0.119848	0.0587563	0.050773	0.0375517	0.0193447	0.09959	0.102573	0.0931811	0.127619	0.0771385	0.0974629	0.106076	0.0919949	0.0136067	0.00990346	0.132356	0.0705157	0.066642	0.085073
S(3,3)SumAverg	68.4386	69.4091	65	64.6182	67.5556	68.5789	68.3256	68.5667	70.1509	69.7478	66.6727	68.5362	67.4216	66.757	68.4961	68.757	68.8426	67.625	69.0633	68.7407	66.4727	65.9929	66.8824	66.4026	69.15	70.5172	66.7336	68.0625	67.5227	67.6667	65.3718	68.1667	67.8929	68.6261	53.3333	55.6667	67.129	66.7436	62.2667	64.5
S(3,3)SumVarnc	259.123	215.333	185.673	221.963	239.358	161.296	142.173	141.312	207.562	176.554	245.293	207.365	197.728	197.522	226.36	211.885	183.341	210.02	162.49	142.748	210.831	207.55	165.61	187.695	158.428	145.767	219.635	214.34	208.204	270.019	186.875	164.946	225.756	224.982	32.8889	14.8889	171.145	146.396	130.796	114.083
S(3,3)SumEntrp	1.51672	1.43639	1.62019	1.65589	1.18838	1.21538	1.53541	1.52573	1.65296	1.61023	1.64001	1.6316	1.70328	1.69095	1.65493	1.6136	1.67805	1.69345	1.59286	1.59074	1.70193	1.68111	1.49404	1.49422	1.24082	1.31707	1.68291	1.70814	1.43639	1.54975	1.54028	1.60793	1.63462	1.59003	0.477121	0.477121	1.38692	1.31038	1.21623	1.1762
S(3,3)Entropy	1.99881	1.91027	2.24798	2.28495	1.5563	1.57978	2.16902	2.18585	2.40564	2.28908	2.25619	2.36999	2.63831	2.62101	2.36454	2.25583	2.56541	2.53096	2.37394	2.40599	2.58298	2.56852	2.1534	2.11029	1.60206	1.71407	2.52698	2.59929	1.91027	2.0886	2.14295	2.27344	2.27499	2.29629	0.778151	0.778151	1.76326	1.83806	1.76812	1.64361
S(3,3)DifVarnc	79.1801	70.5723	58.8443	91.1005	62.8889	52	83.3467	62.1665	66.5098	76.1721	36.1223	69.9805	66.4857	71.9788	61.4694	70.7679	54.0215	48.2136	65.6922	71.8517	62.9514	71.301	83.7971	49.0808	40.5875	62.6706	65.5188	59.4756	98.4809	84.1769	71.5754	98.3051	71.6349	54.4752	8	8.66667	91.0281	71.666	78.8667	100.326
S(3,3)DifEntrp	1.28307	1.26187	1.32916	1.42325	1.07541	1.10836	1.42189	1.40343	1.42336	1.40424	1.30043	1.37758	1.42558	1.46403	1.41007	1.41584	1.40488	1.38558	1.44224	1.46362	1.40047	1.40941	1.35899	1.32948	1.15051	1.20949	1.40615	1.40258	1.31325	1.33539	1.4245	1.45547	1.38621	1.34582	0.276435	0.477121	1.27516	1.27066	1.28893	1.25478
_Area_S(3,-3)	120	102	212	212	42	44	178	196	308	238	186	248	616	568	240	200	496	466	274	260	570	606	190	176	32	38	418	508	66	118	146	228	210	224	22	22	38	62	46	30
S(3,-3)AngScMom	0.00930556	0.0111496	0.00556248	0.00569598	0.0272109	0.0258264	0.00883727	0.00734069	0.00442739	0.00586117	0.0068216	0.00510536	0.00262481	0.00243007	0.00534722	0.0057	0.00321117	0.00311297	0.00471522	0.0047929	0.00297322	0.00253243	0.00620499	0.00716684	0.0332031	0.0263158	0.00365147	0.00292176	0.0151515	0.00847458	0.00778758	0.00515543	0.00603175	0.00585938	0.0454545	0.0454545	0.0263158	0.0176899	0.0226843	0.0333333
S(3,-3)Contrast	346.883	358.157	181.764	228.519	255.381	249.091	112.921	131.388	178.591	238.773	122.882	213.823	145.094	142.074	178.833	196.4	159.585	173.009	193.197	179.692	162.568	179.36	145.526	210.261	386.562	332.789	129.105	117.945	219.061	213.288	145.301	201.465	162.876	172.214	410.545	426.273	362.105	235.226	448.696	428.4
S(3,-3)Correlat	-0.337173	-0.46509	0.0785954	-0.0954716	-0.714449	-0.680185	0.32543	0.315904	0.107485	-0.257488	0.263392	-0.0998539	0.249003	0.271969	0.109558	0.0672661	0.146064	0.0620084	-0.023216	0.0107138	0.161116	0.0723055	0.288719	-0.0923346	-0.597998	-0.466865	0.319049	0.379501	-0.109565	0.0639171	0.408899	0.116144	0.106363	0.022005	-0.818568	-0.84471	-0.552531	-0.319734	-0.707798	-0.611065
S(3,-3)SumOfSqs	129.708	122.23	98.6343	104.302	74.479	74.126	83.6988	96.0302	100.049	94.9405	83.4106	97.205	96.601	97.5741	100.418	105.282	93.4406	92.2229	94.4068	90.8192	96.8956	96.6696	102.299	96.244	120.952	113.436	94.7977	95.0403	98.7146	113.926	122.907	113.969	91.1311	88.0446	112.876	115.539	116.618	89.1186	131.367	132.956
S(3,-3)InvDfMom	0.0462585	0.0833087	0.0876405	0.0717087	0.0674975	0.0600583	0.120073	0.131989	0.10607	0.10018	0.0914047	0.056498	0.0911222	0.090918	0.0781288	0.0521357	0.0951116	0.079114	0.0871393	0.0967859	0.0789883	0.0829128	0.096502	0.0956031	0.0795489	0.0372979	0.0935336	0.108862	0.0547633	0.0554106	0.0728947	0.101268	0.106615	0.122279	0.0173243	0.0163256	0.0390396	0.127243	0.0503668	0.0706508
S(3,-3)SumAverg	71.55	69.6863	64.2925	66.1415	58.5238	60.6364	68.6292	68.0408	70.3571	69.9496	65.0538	67.2258	66.8929	67.6162	67.4	67.18	68.0605	68.0987	66.5985	67.0154	65.8035	66.4752	67.3158	68.2159	61.4375	64.6842	66.6746	67.189	65.6667	66.3051	67.0274	68.0088	67.2381	67.9821	65.6364	62.4545	61.0526	60.9032	63.4783	65.3333
S(3,-3)SumVarnc	171.947	130.764	212.773	188.688	42.5351	47.4132	221.874	252.733	221.606	140.989	210.761	174.997	241.31	248.222	222.84	224.728	214.178	195.883	184.43	183.584	225.014	207.319	263.669	174.715	97.2461	120.953	250.086	262.216	175.798	242.415	346.328	254.412	201.648	179.964	40.9587	35.8843	104.366	121.249	76.7713	103.422
S(3,-3)SumEntrp	1.49832	1.43234	1.6052	1.62217	1.08204	1.06514	1.51412	1.56596	1.67357	1.56003	1.55009	1.57289	1.73071	1.74293	1.60889	1.63645	1.68835	1.68399	1.61263	1.60487	1.69128	1.69054	1.56419	1.5826	1.12886	1.18369	1.72801	1.75328	1.35879	1.55136	1.59681	1.65905	1.56356	1.58236	0.98666	0.911269	1.10836	1.34808	1.22097	1.13595
S(3,-3)Entropy	2.04406	1.96728	2.27238	2.26739	1.58024	1.6024	2.12182	2.18857	2.39716	2.26904	2.19506	2.31736	2.63169	2.64807	2.30429	2.25889	2.54128	2.54399	2.35699	2.34087	2.59632	2.64511	2.22489	2.17109	1.48634	1.57978	2.4872	2.57458	1.81954	2.07188	2.12312	2.30512	2.24194	2.26693	1.34242	1.34242	1.57978	1.76326	1.64967	1.47712
S(3,-3)DifVarnc	104.043	126.64	69.9235	91.0101	81.3923	72.9256	36.8986	51.1208	63.0982	87.4211	40.1304	72.9027	54.0404	49.3316	61.1108	60.9104	57.884	62.3526	72.3576	69.2807	61.0186	66.7057	59.5251	79.8346	108.09	81.8172	47.2417	43.1973	77.2342	72.524	43.9268	70.0207	59.8054	63.4592	130.744	173.174	116.111	75.3257	105.641	109.182
S(3,-3)DifEntrp	1.40423	1.38571	1.36411	1.37876	1.16805	1.10283	1.22696	1.31625	1.39728	1.41032	1.27186	1.40995	1.36165	1.37716	1.37007	1.36095	1.38399	1.401	1.40773	1.39332	1.38472	1.41153	1.30238	1.38036	1.09123	1.18369	1.33547	1.32962	1.28581	1.35041	1.31045	1.4022	1.36213	1.38899	0.98666	0.931927	1.21538	1.18281	1.23085	1.09582
_Area_S(4,0)	126	102	232	220	28	42	152	178	378	284	232	294	596	548	248	202	526	488	306	296	540	574	188	178	34	46	428	500	102	140	176	254	220	228	8	8	82	84	70	54
S(4,0)AngScMom	0.00856639	0.0103806	0.00535077	0.00549587	0.0357143	0.0249433	0.00787742	0.00631233	0.00443717	0.00550486	0.00557372	0.00460456	0.00263502	0.00260403	0.00523543	0.00607784	0.00331073	0.00311576	0.00410099	0.00445124	0.00316872	0.00281052	0.00650747	0.00681732	0.0294118	0.0217391	0.0032754	0.003032	0.0103806	0.00806122	0.00677944	0.00468101	0.00549587	0.00523238	0.125	0.125	0.0133849	0.0127551	0.0155102	0.0192044
S(4,0)Contrast	267.889	374.922	197.802	253.855	105.571	171.381	224.395	214.258	104.021	99.2676	164.276	157.49	128.342	154.562	169.952	217.743	142.703	128.254	179.627	174.101	172.615	173.355	162.277	197.73	259.706	213.478	203.5	175.644	340.922	237.029	175.364	204.945	204.445	181.561	232.5	124	309.171	171.857	91.2571	148
S(4,0)Correlat	-0.0770016	-0.352022	0.0306745	-0.12199	0.591568	0.21037	-0.250228	-0.0685923	0.468995	0.463913	0.150159	0.246876	0.316507	0.210355	0.124306	0.0593001	0.25625	0.308552	0.00554672	0.0131264	0.0321753	0.0450745	0.0501767	-0.0250949	-0.188924	-0.0122441	-0.010407	0.0643737	-0.313528	-0.0730308	0.221532	0.0850315	-0.0510533	-0.0336062	-0.485623	0.0840259	-0.426999	0.126694	0.514986	0.0832838
S(4,0)SumOfSqs	124.368	138.652	102.031	113.127	129.24	108.52	89.7415	100.253	97.9475	92.5854	96.6509	104.558	93.887	97.868	97.0382	115.734	95.9351	92.7431	90.3147	88.2085	89.1767	90.7691	85.4246	96.4449	109.219	105.448	100.702	93.8644	129.773	110.448	112.634	111.996	97.2574	87.8291	78.25	67.6875	108.329	98.3946	94.0767	80.7229
S(4,0)InvDfMom	0.0602318	0.0574224	0.0955973	0.0821862	0.0698316	0.0749206	0.0750919	0.063846	0.125474	0.106449	0.0886908	0.0893669	0.111226	0.103099	0.0864272	0.0828184	0.147266	0.147571	0.0835681	0.0819337	0.0860972	0.0832519	0.103884	0.0932162	0.100394	0.108487	0.0918987	0.0929316	0.0505388	0.0768604	0.0687911	0.0978349	0.0846049	0.0745439	0.00637817	0.00901857	0.0591022	0.090132	0.102394	0.0948913
S(4,0)SumAverg	70.8095	70.8039	65.681	64.7636	62.4286	61.6667	70.1842	68.2135	69.2593	69.1972	66.7069	67.6122	67.4362	67.1971	67.5161	67.2871	67.5627	67.377	66.8301	66.9392	67.163	66.6655	68.2979	67.8652	66.6471	65.6522	66.1542	67.804	69.5098	66.9143	66.3182	67.3228	67.0818	68.2281	54	47.5	65.4146	64.5714	61.0857	56.8148
S(4,0)SumVarnc	229.583	179.687	210.321	198.653	411.388	262.698	134.571	186.752	287.769	271.074	222.328	260.741	247.206	236.91	218.201	245.195	241.037	242.718	181.631	178.733	184.092	189.721	179.422	188.049	177.17	208.314	199.308	199.814	178.171	204.764	275.171	243.038	184.584	169.755	80.5	146.75	124.145	221.721	285.05	174.892
S(4,0)SumEntrp	1.53879	1.43449	1.58863	1.60583	1.14613	1.32222	1.47375	1.56597	1.71112	1.66382	1.63618	1.67424	1.73543	1.73687	1.64082	1.61741	1.71061	1.71533	1.58821	1.61158	1.65348	1.68844	1.55958	1.5966	1.19503	1.30937	1.67464	1.70355	1.48171	1.54715	1.63648	1.68627	1.58428	1.59903	0.60206	0.60206	1.38143	1.45475	1.42366	1.31987
S(4,0)Entropy	2.07648	1.99089	2.30125	2.28495	1.44716	1.60891	2.12243	2.21321	2.42332	2.31548	2.28891	2.36951	2.63024	2.62064	2.31736	2.24276	2.54439	2.54742	2.41292	2.39043	2.55747	2.60642	2.20691	2.18616	1.53148	1.66276	2.52379	2.56831	1.99089	2.10742	2.19162	2.3509	2.28289	2.29984	0.90309	0.90309	1.88445	1.90278	1.8193	1.72124
S(4,0)DifVarnc	73.22	96.4898	69.2921	82.9583	36.9184	60.6304	74.0097	62.8855	40.1904	34.5898	55.1094	58.7105	49.7404	62.9897	52.1241	70.877	63.0665	54.6039	63.7486	60.2755	60.7254	60.9363	66.9027	66.3833	78.2491	69.4783	82.6028	65.0577	79.2434	65.0441	62.2314	78.1608	65.8483	57.8446	22.25	3	122.615	56.0385	32.6253	55.2702
S(4,0)DifEntrp	1.36503	1.39751	1.43198	1.45161	0.931107	1.13938	1.41919	1.40927	1.29241	1.27135	1.36531	1.36732	1.36183	1.37623	1.38039	1.41551	1.35918	1.33645	1.40538	1.3917	1.40554	1.41754	1.31065	1.37693	0.991223	1.09008	1.42384	1.41811	1.40799	1.36918	1.35821	1.41503	1.37503	1.37334	0.451545	0.244219	1.31715	1.28624	1.16985	1.24456
_Area_S(0,4)	116	94	218	222	66	52	212	222	282	214	188	246	646	600	258	218	464	440	306	290	584	602	176	166	42	58	428	518	64	116	146	216	228	246	20	22	32	64	48	30
S(0,4)AngScMom	0.00980975	0.0119964	0.00635468	0.00539729	0.0179063	0.0192308	0.00582948	0.00531613	0.00467783	0.0060704	0.00667723	0.00515566	0.00263589	0.0025	0.00465717	0.00542884	0.00272183	0.00299587	0.00474177	0.0050654	0.0030259	0.00287524	0.00684401	0.00725795	0.0260771	0.0172414	0.00330815	0.00307837	0.0166016	0.00906659	0.00797523	0.00548697	0.00519391	0.00528786	0.055	0.0454545	0.03125	0.0166016	0.0208333	0.0333333
S(0,4)Contrast	277.845	203.787	141.899	232.649	313	301.5	211.962	164.973	221.574	267.421	98.5851	154.594	192.622	213.933	195.333	210.872	221.453	217.182	205.928	182.91	170.716	179.239	212.5	157.783	354.714	381.966	162.93	160.259	191.188	157.741	152.027	216.713	247.316	215.293	101.8	234	327.188	247.625	470.667	381.067
S(0,4)Correlat	-0.163623	0.097216	0.138491	0.00803273	-0.412173	-0.4123	-0.143073	0.120525	-0.0839018	-0.33207	0.406407	0.148816	-0.0130766	-0.0367331	0.116646	0.0372906	-0.158093	-0.123563	-0.078971	-0.0149082	0.0470137	0.0493283	-0.248755	0.159954	-0.543568	-0.548988	0.12858	0.142149	0.263152	0.330158	0.339089	0.0277742	-0.219043	-0.107085	0.353158	-0.453192	-0.253977	-0.332451	-0.84638	-0.777437
S(0,4)SumOfSqs	119.388	112.866	82.355	117.266	110.822	106.741	92.716	93.7906	102.212	100.378	83.0411	90.8109	95.068	103.177	110.563	109.52	95.6109	96.6487	95.428	90.1118	89.5688	94.2698	85.0847	93.9133	114.901	123.295	93.4853	93.407	129.733	117.745	115.014	111.452	101.439	97.2341	78.69	80.5124	130.46	92.9209	127.457	107.196
S(0,4)InvDfMom	0.121458	0.103445	0.119004	0.0741693	0.0956058	0.0397045	0.0593281	0.0699434	0.0989087	0.0806252	0.12555	0.114435	0.0675078	0.062229	0.0748559	0.0872281	0.0605704	0.0600042	0.0831867	0.0718126	0.0814818	0.0794427	0.103826	0.114139	0.0332998	0.0287756	0.0828919	0.102589	0.029902	0.0651481	0.0821817	0.0752048	0.0616412	0.0609975	0.133374	0.118285	0.0692717	0.061817	0.0156619	0.0218843
S(0,4)SumAverg	70.0172	69.0638	66.3211	65.8739	63.7879	67.1923	69.1509	68.8108	69.9291	68.5981	66.3936	67.0163	67.2167	67.8	67.7985	68.8532	69.2716	68.4727	66.6471	66.9655	66.7158	66.6346	68.4545	65.9036	67.6667	69.4828	66.7056	67.9653	67.4375	68.3966	65.9726	69.0833	67.9825	67.7642	66.2	69.6364	65.8125	63.4375	66.9167	71.8667
S(0,4)SumVarnc	199.707	247.677	187.521	236.417	130.288	125.463	158.902	210.189	187.272	134.091	233.579	208.65	187.65	198.773	246.921	227.208	160.991	169.413	175.784	177.537	187.56	197.84	127.839	217.87	104.889	111.215	211.011	213.369	327.746	313.239	308.027	229.095	158.438	173.644	212.96	88.0496	194.652	124.059	39.1597	47.7156
S(0,4)SumEntrp	1.52331	1.47342	1.60177	1.62992	1.30405	1.25288	1.56259	1.5949	1.62387	1.55196	1.57566	1.62129	1.69945	1.69086	1.66643	1.60899	1.67146	1.66854	1.63021	1.6404	1.66929	1.69056	1.48571	1.52413	1.13938	1.23128	1.65657	1.69735	1.35464	1.51547	1.60034	1.64418	1.54503	1.58681	0.939794	1.04139	1.16649	1.30742	1.14497	1.05568
S(0,4)Entropy	2.02294	1.9347	2.2383	2.29007	1.76481	1.716	2.25534	2.29211	2.35949	2.24389	2.1973	2.31811	2.63261	2.64441	2.35385	2.28322	2.5906	2.55485	2.36763	2.34402	2.58171	2.60816	2.18394	2.15845	1.59458	1.76343	2.51851	2.56494	1.78737	2.04889	2.11487	2.27871	2.30577	2.30952	1.27093	1.34242	1.50515	1.78737	1.68124	1.47712
S(0,4)DifVarnc	124.17	66.8474	53.8148	78.531	119.537	91.25	59.23	45.7502	70.3368	81.2384	37.446	58.6172	67.2239	75.4789	71.7617	81.246	75.4804	72.7451	75.2518	62.6678	62.8263	64.4433	98.8838	60.1783	91.0385	95.3056	57.3399	57.3811	42.6523	43.1037	50.3768	76.027	73.261	59.956	31.24	106.926	92.7148	113.934	119.104	120.782
S(0,4)DifEntrp	1.3369	1.29828	1.327	1.41602	1.28581	1.16593	1.40914	1.36017	1.43589	1.41008	1.25883	1.37663	1.42654	1.45377	1.39242	1.41051	1.43501	1.44141	1.42149	1.36922	1.4053	1.4185	1.3604	1.31787	1.13938	1.26772	1.38536	1.39804	1.20873	1.2862	1.34409	1.42042	1.43277	1.37601	0.939794	0.856536	1.0536	1.23832	1.2704	1.04053
_Area_S(4,4)	84	58	182	182	18	22	132	140	268	184	184	234	546	506	212	178	408	386	276	288	490	490	132	116	24	40	378	460	64	108	122	190	186	190	0	0	40	54	40	30
S(4,4)AngScMom	0.0127551	0.0196195	0.00742664	0.00615868	0.0555556	0.0454545	0.00769054	0.00846939	0.00515148	0.0069707	0.00620274	0.00529622	0.00281099	0.00300739	0.00533998	0.00612296	0.00327999	0.00340949	0.00480466	0.00477431	0.00304873	0.00300708	0.00929752	0.0105529	0.0416667	0.0275	0.00330338	0.00272212	0.0166016	0.010631	0.00954045	0.0068144	0.00601226	0.00626039	0	0	0.02625	0.0198903	0.0275	0.0333333
S(4,4)Contrast	209.857	234.103	148.363	188.571	506	457.545	340.576	314.214	227.269	250.891	190.174	196.966	192.484	195.079	284.132	322	200.211	198.767	211.855	242.451	189.294	186.069	211.136	143	154.417	357.05	184.645	158.387	398.594	241.593	371.475	357.632	161.763	124.2	0	0	279.3	333.148	321.6	392.067
S(4,4)Correlat	-0.150481	-0.408541	0.182835	0.130602	-0.533104	-0.570114	-0.565324	-0.595153	-0.107862	-0.25284	-0.00831012	-0.00552031	0.00605267	0.0370529	-0.219873	-0.339097	-0.0558193	-0.00421169	-0.149656	-0.226097	0.0481888	0.0523719	0.0553605	0.320154	-0.148821	-0.665355	0.0928044	0.179324	-0.496783	-0.140218	-0.561604	-0.43768	0.188559	0.295787	0	0	-0.113104	-0.626729	-0.579607	-0.659284
S(4,4)SumOfSqs	91.2041	83.1014	90.7789	108.449	165.025	145.705	108.788	98.4904	102.571	100.129	94.3033	97.9422	96.8278	101.293	116.46	120.23	94.813	98.9666	92.1385	98.8712	99.4388	98.1764	111.755	105.171	67.2066	107.199	101.767	96.4978	133.15	105.941	118.94	124.378	99.6766	88.1835	0	0	125.46	102.398	101.797	118.143
S(4,4)InvDfMom	0.0659453	0.0487707	0.110507	0.0963622	0.00684095	0.00414785	0.053218	0.0602811	0.041421	0.0400674	0.0719697	0.0982959	0.096624	0.0806756	0.0517085	0.0663999	0.0598064	0.0658863	0.0922822	0.0801619	0.0830125	0.086364	0.0764016	0.083863	0.0859189	0.0291132	0.0632305	0.0697102	0.0647385	0.128855	0.0324632	0.0651112	0.116523	0.101662	0	0	0.0916703	0.0626454	0.00772258	0.00631019
S(4,4)SumAverg	65.4286	67.2069	65.5495	63.9341	68.8889	69	65.303	66.1	68.9851	68.6957	66.9348	68.094	67.5311	66.5099	69.3774	69.2809	68.3873	67.513	68.4783	67.5903	65.9959	65.4245	66.6818	67.6207	62.5833	67.05	66.6667	67.3957	66.8438	67.2222	64.3279	67.8421	67.1183	68.0526	0	0	71.4	69.6667	67.9	70.6
S(4,4)SumVarnc	154.959	98.302	214.753	245.226	154.099	125.273	94.5748	79.7471	183.015	149.625	187.039	194.803	194.828	210.092	181.707	158.921	179.041	197.1	156.699	153.034	208.461	206.636	235.884	277.684	114.41	71.7475	222.423	227.604	134.007	182.173	104.286	139.88	236.943	228.534	0	0	222.54	76.4444	85.59	80.5067
S(4,4)SumEntrp	1.38848	1.31707	1.57743	1.58114	0.954243	0.98666	1.41754	1.39201	1.63484	1.48858	1.59727	1.57484	1.68824	1.68748	1.63393	1.58051	1.67048	1.67292	1.58144	1.59721	1.6979	1.68878	1.55603	1.51887	0.978838	1.12041	1.70255	1.71262	1.32872	1.48508	1.48986	1.55255	1.63478	1.61197	0	0	1.21072	1.25844	1.18062	1.09582
S(4,4)Entropy	1.90278	1.72191	2.17818	2.2303	1.25527	1.34242	2.11601	2.09022	2.33713	2.18789	2.22228	2.29717	2.59904	2.57162	2.28658	2.22336	2.51435	2.49921	2.35419	2.35952	2.55715	2.56607	2.05784	1.99699	1.38021	1.57196	2.50263	2.59011	1.78737	1.98883	2.03701	2.20187	2.23391	2.22172	0	0	1.58701	1.7101	1.57196	1.47712
S(4,4)DifVarnc	68.1338	77.4221	59.6718	76.8163	114.84	53.9008	97.0266	79.2492	61.3589	74.4636	60.4121	75.2125	74.606	69.5151	85.4817	113.214	54.6773	55.0154	74.3879	80.7731	76.5875	69.1647	90.4695	44.3746	52.7431	83.1475	60.2463	50.6787	155.429	110.617	95.1529	123.703	69.7685	50.24	0	0	86.09	123.435	59.16	75.2267
S(4,4)DifEntrp	1.32312	1.15333	1.33753	1.39367	0.887347	0.98666	1.4262	1.39033	1.42288	1.37933	1.39261	1.41865	1.43775	1.43761	1.41046	1.43088	1.40947	1.42053	1.43299	1.46991	1.40942	1.4296	1.3055	1.25993	0.978838	1.0301	1.40763	1.39311	1.26517	1.27371	1.39178	1.46674	1.32529	1.27386	0	0	1.21072	1.24456	1.18062	1.05568
_Area_S(4,-4)	100	78	170	174	22	26	142	158	256	196	144	198	556	514	194	160	442	414	222	206	512	550	156	144	12	16	364	454	36	84	112	188	168	184	12	12	12	36	26	16
S(4,-4)AngScMom	0.0108	0.0138067	0.00629758	0.00680407	0.0495868	0.0414201	0.00773656	0.00785131	0.00497437	0.00666389	0.0085841	0.00601979	0.00275607	0.00272525	0.00584547	0.00710938	0.00329641	0.00344232	0.00507264	0.00541993	0.00310516	0.00277025	0.00846483	0.0080054	0.0972222	0.0703125	0.00381898	0.00306623	0.0277778	0.0119048	0.0098852	0.00650747	0.00687358	0.00620274	0.0833333	0.0833333	0.0972222	0.029321	0.0384615	0.0625
S(4,-4)Contrast	351.36	346.718	223.235	223.632	205.727	277.154	110.141	127.329	206.836	266.51	145.736	219.889	185.219	172.121	168.392	209.55	173.113	180.092	203.396	194.466	143.094	160.953	196.679	275.917	192.667	143.5	140.082	143.507	70.5556	263.119	173.429	233.787	151.321	194.913	578.667	241.167	115.5	182.833	366.538	267.75
S(4,-4)Correlat	-0.399952	-0.479464	-0.047747	-0.0587895	-0.311642	-0.570171	0.376669	0.338429	-0.00241626	-0.289261	0.161964	-0.097612	0.0421534	0.137424	0.203526	0.0396205	0.0973413	0.0343038	0.00939182	0.0232238	0.267701	0.169104	0.0699602	-0.413548	-0.625879	-0.175026	0.245611	0.249703	-0.0744501	-0.0679813	0.260414	-0.0206447	0.220559	-0.00209927	-0.947644	-0.629046	-0.593409	-0.329831	-0.875501	-0.504213
S(4,-4)SumOfSqs	125.49	117.177	106.531	105.607	78.4236	88.2559	88.3485	96.2324	103.169	103.358	86.951	100.167	96.6853	99.7712	105.711	109.097	95.8907	93.2445	102.662	99.5448	97.7018	96.8549	105.737	97.5972	59.25	61.0625	92.8449	95.6332	32.8333	123.185	117.247	114.529	97.0705	97.2524	148.556	74.0208	36.2431	68.7431	97.7175	89
S(4,-4)InvDfMom	0.0623211	0.0536084	0.0814265	0.0968696	0.120299	0.107098	0.139702	0.0993409	0.068459	0.0683444	0.102925	0.0758236	0.0808559	0.0832177	0.0982502	0.068635	0.0926812	0.0885443	0.0847665	0.0946554	0.078832	0.0802015	0.110364	0.0713665	0.175324	0.196145	0.0949335	0.0926274	0.112119	0.0923142	0.11353	0.0837838	0.0899062	0.082205	0.00880162	0.00704426	0.181147	0.0911462	0.0491551	0.0751045
S(4,-4)SumAverg	68.6	65.4359	64.9294	65.5632	56.8182	59.7692	68.9859	68.2405	69.5703	68.449	65.2917	66.7778	67.1187	67.2802	66.8866	66.9	68.1448	68.1304	65.5766	66.3884	65.7109	66.4655	66.3205	67	47	53.5	66.4121	67.0132	61.3333	63.7381	67.6071	67.5745	66.9405	67.6522	62.6667	53.5	44.8333	52.8333	72.2308	80
S(4,-4)SumVarnc	150.6	121.989	202.889	198.798	107.967	75.8698	243.253	257.6	205.839	146.921	202.068	180.779	201.522	226.964	254.451	226.84	210.45	192.886	207.253	203.713	247.713	226.467	226.269	114.472	44.3333	100.75	231.297	239.026	60.7778	229.622	295.56	224.33	236.961	194.096	15.5556	54.9167	29.4722	92.1389	24.3314	88.25
S(4,-4)SumEntrp	1.3987	1.3228	1.59638	1.61161	0.856536	1.02132	1.57196	1.56604	1.64796	1.54873	1.49414	1.58466	1.71682	1.7301	1.65035	1.5729	1.67658	1.66286	1.63538	1.61168	1.71253	1.70506	1.46412	1.47731	0.778151	0.90309	1.69467	1.7226	1.12148	1.44041	1.55325	1.63322	1.60842	1.54212	0.778151	0.778151	0.677808	1.02934	0.911214	0.90309
S(4,-4)Entropy	1.97592	1.86894	2.2092	2.1895	1.31506	1.39182	2.12261	2.131	2.33178	2.20393	2.08729	2.24268	2.60859	2.60141	2.25366	2.16273	2.52008	2.5039	2.30839	2.2788	2.54959	2.60157	2.10436	2.11237	1.02901	1.16649	2.45109	2.54664	1.5563	1.92428	2.01696	2.21089	2.18318	2.22228	1.07918	1.07918	1.02901	1.53958	1.41497	1.20412
S(4,-4)DifVarnc	100.454	106.865	83.9953	99.3225	84.7273	108.154	38.2496	45.4152	66.0058	84.5356	55.7498	78.5432	66.3467	54.3517	54.3205	64.9494	61.5766	62.4689	65.1751	67.1926	49.6996	56.9869	79.3184	98.8789	64.2222	53.25	47.3095	50.4309	29.0247	123.091	69.8253	88.7641	45.2805	67.1248	178.667	21.1389	31.4722	67.8673	108.071	85.5
S(4,-4)DifEntrp	1.41369	1.35746	1.33081	1.3783	0.931927	1.02132	1.26966	1.28013	1.4012	1.4305	1.29217	1.41054	1.41573	1.41098	1.34304	1.35882	1.40599	1.4172	1.39575	1.37807	1.35842	1.39939	1.33969	1.43713	0.677808	0.90309	1.34714	1.35707	0.995889	1.20583	1.33783	1.40502	1.35078	1.38485	0.778151	0.677808	0.778151	1.10886	1.11394	0.827832
_Area_S(5,0)	104	82	208	194	12	28	122	146	354	262	210	268	546	498	216	172	496	456	274	262	492	528	162	154	20	30	390	456	86	120	154	228	190	200	2	0	70	68	56	46
S(5,0)AngScMom	0.010355	0.0133849	0.00600962	0.00605803	0.0833333	0.0357143	0.00886858	0.00731845	0.00453254	0.00562322	0.00612245	0.00487302	0.00272377	0.0029435	0.00501543	0.00615197	0.00309736	0.00323176	0.0046353	0.00483655	0.00337101	0.00297004	0.00731596	0.00716816	0.05	0.0355556	0.00380013	0.00341451	0.0124392	0.00902778	0.00750548	0.00542475	0.00637119	0.006	0.5	0	0.0142857	0.0155709	0.0210459	0.0226843
S(5,0)Contrast	320.327	446	201.683	273.237	221.667	259.357	264.852	272.493	130.791	105.13	177.724	151.91	158.956	169.08	196.667	247.965	149.476	133.886	154.277	157.832	195.675	189.773	186.346	243.195	271.8	198.6	195.979	177.193	357.977	262.633	199.234	227.175	210.463	191.44	144	0	250.571	199.294	105.5	150.913
S(5,0)Correlat	-0.372773	-0.569108	0.0701539	-0.173781	0.277567	-0.158544	-0.399225	-0.301037	0.332695	0.441368	0.118376	0.257381	0.167123	0.122465	0.0732176	-0.0424805	0.215357	0.250271	0.15205	0.112355	-0.11595	-0.0631978	-0.101158	-0.215007	-0.477013	-0.0425683	0.010617	0.0342012	-0.42648	-0.273353	0.0917184	-0.0242209	-0.0836436	-0.0469498	-1	0	-0.432271	0.0535691	0.383409	0.0434637
S(5,0)SumOfSqs	116.672	142.119	108.45	116.392	153.417	111.932	94.6426	104.722	97.9994	94.0957	100.793	102.28	95.4259	96.3382	106.102	118.93	95.2508	89.2896	90.9707	88.905	87.6718	89.2462	84.6135	100.08	92.01	95.2456	99.0413	91.7339	125.476	103.127	109.676	110.902	97.109	91.4275	36	0	87.4735	105.287	85.551	78.8852
S(5,0)InvDfMom	0.0244703	0.0249968	0.0730628	0.0730621	0.0188376	0.0328375	0.0591233	0.0548511	0.130635	0.108594	0.0854729	0.0982014	0.0812116	0.0857399	0.0755797	0.0756979	0.154441	0.151937	0.0657162	0.0666152	0.0809965	0.0847202	0.083535	0.0628771	0.0305816	0.0872461	0.0984674	0.0992265	0.038307	0.0474592	0.102956	0.0889473	0.0392846	0.0488882	0.00689655	0	0.0508647	0.0293467	0.131249	0.106832
S(5,0)SumAverg	70.7115	69.3659	65.7404	65.5464	57	57.3571	68.2295	66.8219	69.8418	69.3588	66.4857	67.3433	67.5275	67.1285	67.3333	67.1512	67.3548	67.4386	65.9854	66.5649	67.3659	66.8258	68.1235	67.4026	63.4	60.8667	65.4462	67.3421	67.9302	66.4	66.2727	67.9123	66.4421	67.3	46	0	63.1429	66.7059	61.2857	58.7391
S(5,0)SumVarnc	146.359	122.476	232.115	192.33	392	188.372	113.718	146.393	261.207	271.253	225.45	257.211	222.747	216.273	227.741	227.756	231.527	223.273	209.606	197.788	155.012	167.212	152.108	157.124	96.24	182.382	200.186	189.743	143.925	149.873	239.471	216.431	177.973	174.27	0	0	99.3224	221.855	236.704	164.628
S(5,0)SumEntrp	1.40186	1.35566	1.56617	1.56763	0.778151	1.01712	1.43175	1.49877	1.6953	1.65407	1.62014	1.67865	1.72274	1.71123	1.6873	1.6044	1.70493	1.68559	1.63123	1.64585	1.60445	1.6426	1.53155	1.50769	0.939794	1.13595	1.65751	1.67316	1.42159	1.49075	1.58331	1.6173	1.57208	1.55302	0	0	1.36977	1.32333	1.33153	1.24714
S(5,0)Entropy	1.99388	1.88445	2.24281	2.23504	1.07918	1.44716	2.06169	2.14373	2.39997	2.30257	2.23978	2.34951	2.61327	2.57177	2.30937	2.21803	2.55433	2.52658	2.36192	2.3436	2.52365	2.57491	2.15377	2.15624	1.30103	1.45705	2.46867	2.52721	1.9135	2.0541	2.14061	2.28993	2.21538	2.24082	0.30103	0	1.8451	1.8148	1.69443	1.64967
S(5,0)DifVarnc	78.2851	125.503	64.2972	87.4911	69.5556	80.9439	85.907	79.5496	52.7133	37.9148	55.4634	55.4605	51.1158	56.5841	63.9904	82.2743	68.3306	58.9268	48.9528	51.9464	66.3073	63.2102	68.8508	77.2201	70.16	52.9956	80.224	68.0455	81.4895	63.8233	73.0363	81.4863	58.2655	57.3436	0	0	95.391	51.0277	45.9898	60.2495
S(5,0)DifEntrp	1.34849	1.36675	1.39728	1.43986	0.778151	1.10312	1.369	1.41058	1.32124	1.27473	1.37774	1.37178	1.39555	1.40738	1.36645	1.40899	1.37037	1.35792	1.3318	1.3317	1.43106	1.42939	1.35029	1.39433	1	1.04053	1.42252	1.41324	1.41288	1.38807	1.35667	1.41116	1.34711	1.35873	0	0	1.25272	1.25918	1.16478	1.16861
_Area_S(0,5)	94	72	188	194	54	40	192	202	234	174	154	208	606	560	228	194	416	394	272	256	544	560	150	138	30	44	390	478	42	92	118	182	200	218	12	14	14	46	30	12
S(0,5)AngScMom	0.0119964	0.0146605	0.00656406	0.00637687	0.0205761	0.02625	0.00585938	0.00544064	0.00577106	0.0070683	0.00818013	0.00573225	0.00249431	0.00251913	0.00496307	0.00648315	0.00343241	0.00364606	0.00440636	0.00540161	0.00306823	0.00274872	0.00764444	0.00882168	0.0333333	0.0247934	0.00362919	0.0030024	0.0238095	0.0122873	0.0101982	0.00652095	0.0055	0.00517633	0.0833333	0.0714286	0.0714286	0.0217391	0.0355556	0.0833333
S(0,5)Contrast	295.149	256.611	124.936	199.928	300.259	305.4	253.156	196.663	246.487	308.092	74.3247	113.212	206.954	232.543	216.175	202.887	258.942	251.086	207.596	185.977	180.471	181.679	195.213	128.986	380.533	388.955	169.985	165.188	216.762	130.935	170.407	246.527	254.39	233.33	64.3333	130.857	416.286	263.826	370.533	381.5
S(0,5)Correlat	-0.35834	-0.11717	0.25639	0.116579	-0.397076	-0.362298	-0.31296	-0.0391911	-0.220828	-0.431317	0.559156	0.422128	-0.0746523	-0.122046	0.0362355	0.0710368	-0.303898	-0.268837	-0.0574089	0.00794141	0.00197334	0.0660913	-0.132036	0.287111	-0.649012	-0.609318	0.0601218	0.0930103	0.183044	0.384733	0.200498	-0.125749	-0.230043	-0.179332	0.415742	-0.324246	-0.628193	-0.579207	-0.816419	-0.93942
S(0,5)SumOfSqs	108.643	114.849	84.0066	113.156	107.46	112.09	96.4067	94.6233	100.951	107.625	84.2981	97.9555	96.2887	103.624	112.152	109.201	99.2955	98.9434	98.1624	93.7327	90.4137	97.2678	86.2223	90.4667	115.382	120.845	90.4291	91.064	132.664	106.405	106.571	109.495	103.407	98.9248	55.0556	49.4082	127.837	83.5312	101.996	98.3542
S(0,5)InvDfMom	0.10345	0.0534485	0.0780528	0.07084	0.0874199	0.0677791	0.0496593	0.0611113	0.0726271	0.0722841	0.153523	0.128142	0.0697756	0.0657132	0.0641487	0.0879348	0.0655742	0.0678211	0.0832437	0.0776463	0.108847	0.0977992	0.126466	0.113424	0.0284509	0.0359396	0.076253	0.0770714	0.0667906	0.0957925	0.130309	0.0954918	0.0463319	0.0462448	0.130636	0.113092	0.0214186	0.0280361	0.126461	0.12673
S(0,5)SumAverg	68.2553	68.7778	66.1277	64.9175	66.1111	69.8	68.5938	68.2475	68.9829	67.1264	67.8312	66.75	66.9406	67.7286	68.9123	68.433	68.7788	67.8477	66.3603	66.8047	66.6471	66.4929	68.76	67.2464	62.9333	65.5909	66.4256	67.6653	67.9048	66.5	66.5424	69.2747	66.89	66.8716	65.3333	66.2857	63.7143	58.6957	75.8667	81.5
S(0,5)SumVarnc	139.424	202.784	211.09	252.694	129.58	142.96	132.47	181.83	157.316	122.409	262.868	278.611	178.201	181.955	232.431	233.916	138.24	144.687	185.054	188.954	181.184	207.393	149.676	232.881	80.9956	94.4236	191.732	199.068	313.896	294.685	255.875	191.452	159.238	162.369	155.889	66.7755	95.0612	70.2987	37.4489	11.9167
S(0,5)SumEntrp	1.43499	1.4162	1.59113	1.5898	1.23614	1.16926	1.5678	1.62758	1.56572	1.53902	1.55229	1.63929	1.68267	1.67359	1.64779	1.57543	1.6249	1.64636	1.66386	1.63343	1.67961	1.68292	1.50361	1.54816	1.01554	1.1562	1.66948	1.69857	1.29355	1.43359	1.47608	1.5116	1.54554	1.56913	0.778151	0.845098	0.845098	1.16861	1.01554	0.677808
S(0,5)Entropy	1.9347	1.84061	2.2037	2.22029	1.69895	1.58701	2.24567	2.27555	2.27013	2.17135	2.1142	2.26017	2.6488	2.63258	2.31833	2.21408	2.50618	2.48467	2.37756	2.30471	2.57429	2.6084	2.13194	2.08316	1.47712	1.61609	2.47563	2.5635	1.62325	1.92452	2.01066	2.20795	2.27093	2.29979	1.07918	1.14613	1.14613	1.66276	1.45705	1.07918
S(0,5)DifVarnc	126.702	81.784	41.622	70.1558	113.481	92.24	67.7994	50.5168	68.025	87.5524	25.6876	41.2881	70.2259	79.8439	75.94	72.409	93.1767	89.0088	72.455	63.7704	69.6021	65.8087	96.0117	50.8297	107.182	107.63	60.6481	58.2086	75.0385	38.1895	59.9787	90.1401	75.0979	64.3303	19.8889	57.3878	102.49	100.431	127.173	199.25
S(0,5)DifEntrp	1.31656	1.21656	1.30124	1.38887	1.22226	1.13915	1.4173	1.38199	1.43395	1.44518	1.20283	1.28924	1.45755	1.469	1.4237	1.3679	1.46859	1.46219	1.39846	1.36838	1.42276	1.42415	1.32791	1.28644	1.04053	1.0925	1.39694	1.39054	1.03173	1.26105	1.31044	1.41448	1.41523	1.39529	0.778151	0.845098	0.845098	1.13256	1.13595	0.778151
_Area_S(5,5)	56	34	146	146	2	8	90	102	220	142	150	196	480	446	174	144	348	324	236	252	428	422	98	80	10	24	328	408	40	82	92	152	150	154	0	0	22	34	22	18
S(5,5)AngScMom	0.0216837	0.0432526	0.00816288	0.00731845	0.5	0.125	0.0120988	0.0113418	0.00549587	0.00783575	0.00746667	0.00629946	0.00328993	0.00316717	0.00680407	0.00771605	0.00374884	0.00405807	0.00556593	0.00554296	0.00325356	0.00327935	0.0106206	0.0125	0.1	0.0416667	0.00369943	0.00314783	0.0275	0.01279	0.012051	0.00727147	0.00871111	0.00978243	0	0	0.053719	0.0311419	0.053719	0.0617284
S(5,5)Contrast	155.25	172.176	154.671	175.288	1849	773.25	337.911	335.196	270.218	287.028	227.387	212.571	210.604	205.91	376.264	336.278	223.195	242.222	182.907	190.524	202.164	185.156	214.776	155.275	119.6	197.583	223.22	201.843	594.55	306.634	400.217	306.855	137.893	97.974	0	0	211.818	368.235	262.364	316.222
S(5,5)Correlat	-0.450044	-0.59043	0.197513	0.219816	-1	-0.727089	-0.766232	-0.791713	-0.247968	-0.367234	-0.134129	-0.0425766	-0.0878494	-0.00177527	-0.469026	-0.460529	-0.0773592	-0.130152	-0.0746068	-0.0174251	0.0242745	0.0612998	0.230927	0.332759	-0.597222	-0.497828	-0.128626	0.00395198	-0.82462	-0.419352	-0.58044	-0.215036	0.304738	0.442077	0	0	0.184848	-0.672797	-0.724764	-0.703738
S(5,5)SumOfSqs	53.5328	54.1289	96.3699	112.337	462.25	223.859	95.6588	93.5407	108.263	104.967	100.247	101.945	96.7984	102.773	128.066	115.122	103.584	107.164	85.104	93.6304	103.597	98.6238	139.633	116.356	37.44	65.9566	98.8899	101.322	162.924	108.019	126.616	126.274	99.1664	87.8025	0	0	129.926	110.066	76.0579	92.8025
S(5,5)InvDfMom	0.0196411	0.0258295	0.0903752	0.0694484	0.000540541	0.00214655	0.0236848	0.0196443	0.0694959	0.0745708	0.0756901	0.0773555	0.0887124	0.082174	0.0915754	0.077868	0.0692948	0.0740559	0.0759218	0.0755931	0.0913834	0.0836095	0.070384	0.0553086	0.0270005	0.019498	0.0790784	0.0778773	0.0208471	0.062456	0.0544072	0.078947	0.211116	0.233386	0	0	0.00923264	0.119181	0.140628	0.170421
S(5,5)SumAverg	61.1071	61.1176	66.3699	65.726	75	67.75	60.1778	61.1176	67.2364	66.3239	67.2533	67.8776	67.6375	66.5471	69.023	67.1111	67.5632	67.4444	67.6695	65.619	65.4065	64.7204	65.7143	70.725	54.8	57.9167	66.5854	67.2549	64.45	66.1463	63.4348	64.9079	66.88	67.5325	0	0	74.5455	73.1765	74.3636	79.1111
S(5,5)SumVarnc	58.8814	44.3391	230.808	274.062	0	122.188	44.724	38.9666	162.835	132.839	173.602	195.209	176.589	205.181	135.999	124.21	191.143	186.432	157.509	183.998	212.223	209.339	343.755	310.149	30.16	66.2431	172.34	203.445	57.1475	125.442	106.246	198.242	258.772	253.236	0	0	307.884	72.0277	41.8678	54.9877
S(5,5)SumEntrp	1.2159	1.04001	1.55246	1.60034	0	0.60206	1.29543	1.31718	1.5775	1.46018	1.51287	1.5827	1.65589	1.68416	1.50089	1.48199	1.65692	1.65015	1.54342	1.58528	1.70739	1.68591	1.54275	1.48165	0.69897	1.07918	1.61999	1.68127	1.18062	1.40166	1.37243	1.53663	1.53892	1.61228	0	0	0.98666	1.04001	0.931927	0.887347
S(5,5)Entropy	1.68368	1.41187	2.11176	2.14373	0.30103	0.90309	1.92748	1.96138	2.27948	2.11837	2.13997	2.22775	2.54373	2.53625	2.19211	2.12491	2.45635	2.42503	2.28487	2.31155	2.52592	2.51971	1.97894	1.90309	1	1.38021	2.45163	2.52507	1.57196	1.89913	1.93107	2.15016	2.0968	2.06042	0	0	1.28769	1.51377	1.28769	1.22182
S(5,5)DifVarnc	35.0344	56.2976	55.4915	56.9848	0	84.1875	95.9358	73.5179	73.1987	81.045	66.266	70.0371	79.5971	72.0568	132.258	127.636	70.2325	80.2102	64.6872	62.0794	80.4429	68.3935	88.7863	49.6994	34.96	43.4097	74.7958	68.4633	216.248	136.999	85.5406	98.5088	70.8718	48.4271	0	0	25.8678	144.997	90.9917	101.111
S(5,5)DifEntrp	1.18102	1.07542	1.31425	1.30856	0	0.60206	1.3279	1.31718	1.44228	1.41655	1.42547	1.37825	1.45097	1.45216	1.49523	1.41163	1.45178	1.45021	1.40171	1.39928	1.42339	1.40131	1.31772	1.21092	0.69897	0.928666	1.4227	1.42929	1.24082	1.35206	1.36082	1.41377	1.2446	1.20354	0	0	0.801803	1.1242	0.801803	0.954243
_Area_S(5,-5)	78	52	132	136	8	14	106	120	206	156	106	152	502	460	150	122	388	360	172	154	454	494	122	114	0	2	310	398	14	52	80	148	128	146	6	2	0	14	10	4
S(5,-5)AngScMom	0.0144642	0.0221893	0.00837925	0.00875865	0.125	0.0714286	0.0129939	0.00986111	0.00622113	0.00805391	0.00996796	0.00727147	0.00292059	0.00299622	0.00746667	0.00913733	0.00364013	0.0037963	0.00628718	0.00742115	0.0035514	0.00304873	0.00940607	0.00923361	0	0.5	0.00420395	0.00354789	0.0918367	0.0192308	0.01375	0.00821768	0.00866699	0.0075061	0.166667	0.5	0	0.0714286	0.1	0.25
S(5,-5)Contrast	283.154	259.231	301.152	229.074	61.5	363.286	109.264	110.667	222.854	312.974	163.019	211	209.729	199.522	198.333	239.803	187.046	198.972	225.07	168.169	151.256	156.737	201.164	304.737	0	4	150.948	154.749	63.5714	304.962	128.8	243.811	236.922	254.342	354	9	0	314.143	194.8	102.5
S(5,-5)Correlat	-0.275617	-0.518939	-0.215065	-0.126565	0.0955882	-0.785367	0.389852	0.45191	-0.0957406	-0.403975	0.138963	0.0038563	-0.0384495	0.0329926	0.125254	-0.0278151	0.0625789	-0.0374264	0.0282872	0.2319	0.225509	0.170614	0.0292642	-0.608589	0	-1	0.186414	0.195744	-0.50884	-0.336254	0.292691	-0.160106	-0.0917672	-0.137557	-0.954601	-1	0	-0.865253	-0.858779	-0.786492
S(5,-5)SumOfSqs	110.987	85.3328	123.924	101.669	34	101.74	89.5391	100.957	101.691	111.46	94.6643	105.908	100.982	103.165	113.366	116.657	99.7665	95.897	115.811	109.471	97.6483	94.4897	103.614	94.7218	0	1	92.7673	96.2061	21.0663	114.111	91.0494	105.081	108.504	111.793	90.5556	2.25	0	84.2092	52.4	28.6875
S(5,-5)InvDfMom	0.0902159	0.0727957	0.125803	0.101562	0.0803167	0.103705	0.141006	0.126386	0.0470192	0.0265365	0.0639384	0.0692799	0.0768731	0.0872852	0.0938601	0.117178	0.107203	0.0974208	0.0562682	0.0755375	0.0857809	0.0691753	0.0854581	0.0546843	0	0.2	0.086493	0.0968411	0.0331327	0.0389141	0.201175	0.0986357	0.0530083	0.041247	0.0679245	0.1	0	0.0225097	0.020041	0.0164547
S(5,-5)SumAverg	63.9744	59.7692	64.697	63.5147	59	61.5714	71.2264	69.2	67.6699	66.0769	64.9434	65.3947	66.7092	67.2522	66.04	66.7213	68.1289	68.4722	64.5814	65.026	65.7577	65.9757	63.9508	64.2456	0	50	66.3032	66.5578	57.8571	59.5	67.05	66.8378	67.4844	66.863	52.6667	49	0	44.1429	86	95.5
S(5,-5)SumVarnc	160.794	82.1006	194.545	177.603	74.5	43.6735	248.892	293.16	183.91	132.866	215.638	212.634	194.198	213.136	255.132	226.824	212.019	184.616	238.174	269.714	239.338	221.222	213.293	74.1502	0	0	220.121	230.076	20.6939	151.481	235.398	176.514	197.094	192.831	8.22222	0	0	22.6939	14.8	12.25
S(5,-5)SumEntrp	1.35746	1.21224	1.52655	1.50926	0.60206	0.759089	1.45943	1.54357	1.58687	1.49106	1.52108	1.5891	1.66963	1.68959	1.55381	1.51139	1.68205	1.65117	1.59225	1.59074	1.69161	1.70724	1.36831	1.44019	0	0	1.65262	1.7003	0.759089	1.24414	1.34788	1.51376	1.4974	1.55801	0.477121	0	0	0.845098	0.69897	0.30103
S(5,-5)Entropy	1.8535	1.66969	2.08865	2.07599	0.90309	1.14613	1.92307	2.02399	2.23639	2.12555	2.00827	2.15016	2.58134	2.56326	2.13997	2.05182	2.47166	2.45634	2.21103	2.14452	2.50372	2.56407	2.04195	2.04106	0	0.30103	2.40008	2.4864	1.06012	1.716	1.87299	2.11024	2.07428	2.13549	0.778151	0.30103	0	1.14613	1	0.60206
S(5,-5)DifVarnc	99.169	92.2249	116.85	81.8795	19.25	138.286	41.9003	39.5456	54.1067	69.9343	56.1111	63.8248	71.409	62.7335	73.1918	91.0433	67.2906	70.6537	66.7783	47.1688	56.9004	51.6536	74.3246	106.767	0	0	56.1687	56.6492	10.4898	94.7115	59.91	98.5106	54.2498	62.5389	98	0	0	89.1429	50.8	12.25
S(5,-5)DifEntrp	1.34407	1.21224	1.38449	1.33862	0.60206	0.845098	1.25195	1.24177	1.33495	1.38939	1.25472	1.34579	1.44537	1.43036	1.37271	1.37818	1.41511	1.42497	1.42898	1.3396	1.37967	1.39105	1.31474	1.43621	0	0	1.36886	1.38084	0.759089	1.27604	1.20599	1.35661	1.37912	1.37195	0.276435	0	0	0.845098	0.69897	0.30103
Horzl_RLNonUni	91.819	81.3596	134.139	149.601	44.5	39.7755	135.168	140.253	166.128	153.409	140.032	176.835	358.478	338.003	172.337	148.266	285.443	261.811	200.402	199.46	324.358	319.793	123.569	109.422	48.04	61	234.801	291.988	80.0244	102.291	106.934	144.725	137.405	148.006	33	33	62.1212	77	57.2857	48.2593
Horzl_GLevNonU	3.95238	2.91011	5.56962	5.13497	2.38462	1.85714	4.58042	5	6.90521	5.88636	5.11465	6	11.3785	10.5233	5.80435	4.78481	9.1962	8.72973	6.43925	6.39906	11.1296	11.0992	5.0146	4.34375	2.08	2.37705	8.01471	9.2454	3.07317	3.76364	3.90164	5.35928	4.63291	5.09581	2.09091	2.0303	2.90909	3.20779	2.39683	2.40741
Horzl_LngREmph	1.24762	1.13483	1.24684	1.12883	1.32692	1.5102	1.15385	1.16667	1.45024	1.26136	1.17197	1.13918	1.13043	1.12877	1.125	1.12658	1.18354	1.25	1.1215	1.09859	1.1493	1.20386	1.22628	1.27344	1.06	1	1.23897	1.16564	1.03659	1.10909	1.29508	1.21557	1.24051	1.23952	1	1	1.09091	1	1.14286	1.25926
Horzl_ShrtREmp	0.948677	0.966292	0.938291	0.967791	0.939637	0.9178	0.977078	0.973148	0.908504	0.947285	0.957006	0.965206	0.967391	0.970852	0.974789	0.975387	0.961146	0.952515	0.974818	0.975352	0.965806	0.952097	0.959651	0.940321	0.985	1	0.944342	0.958589	0.990854	0.972727	0.949283	0.946108	0.946906	0.953426	1	1	0.977273	1	0.964286	0.955761
Horzl_Fraction	0.929204	0.956989	0.923977	0.958824	0.912281	0.875	0.959732	0.955414	0.879167	0.926316	0.945783	0.955665	0.958333	0.960526	0.963351	0.963415	0.946108	0.930818	0.963964	0.968182	0.954301	0.937984	0.938356	0.920863	0.980392	1	0.928328	0.947674	0.987952	0.964912	0.924242	0.932961	0.929412	0.932961	1	1	0.970588	1	0.954545	0.931034
Vertl_RLNonUni	96.3962	77.4828	145	137.405	54.0357	56	122.05	114.871	183.986	163.895	140.032	179.656	337.888	313.964	167.699	149.314	289.327	272.322	186.273	188.875	298.484	318.174	128.514	118.742	51	58.0333	242.985	276.053	77.0988	99.4587	106.317	155.749	148.531	139.793	33	30.0625	56.5	68.2432	54.5161	55.0351
Vertl_GLevNonU	3.90566	2.88506	5.97531	5.05063	2.53571	2.28571	4.30935	4.41007	7.10046	5.97238	5.24204	6.07692	10.8956	10.1821	6.07104	5.01258	9.14465	8.78738	6.24402	6.17308	10.5884	10.8788	5.11429	4.37879	2.13725	2.23333	7.86545	8.95611	3.02469	3.78899	3.92683	5.54971	4.8642	4.9878	2.09091	1.875	2.84375	3.05405	2.41935	2.61404
Vertl_LngREmph	1.25472	1.22989	1.16667	1.24051	1.05357	1	1.23022	1.47482	1.30594	1.14917	1.17197	1.12308	1.20104	1.19328	1.13115	1.09434	1.15723	1.18272	1.19617	1.20192	1.25217	1.19835	1.12857	1.15909	1	1.05	1.20364	1.24765	1.07407	1.13761	1.21951	1.14035	1.16049	1.29878	1	1.09375	1.1875	1.12162	1.19355	1.05263
Vertl_ShrtREmp	0.962854	0.9553	0.958333	0.946906	0.986607	1	0.95044	0.92551	0.933663	0.962707	0.957006	0.969231	0.95264	0.951681	0.967213	0.976415	0.964186	0.961702	0.956273	0.963041	0.945109	0.950413	0.967857	0.960227	1	0.9875	0.953131	0.945054	0.981481	0.965596	0.945122	0.964912	0.966735	0.938855	1	0.976562	0.953125	0.969595	0.951613	0.986842
Vertl_Fraction	0.938053	0.935484	0.947368	0.929412	0.982456	1	0.932886	0.88535	0.9125	0.952632	0.945783	0.960591	0.938725	0.939474	0.958115	0.969512	0.952096	0.946541	0.941441	0.945455	0.927419	0.937984	0.958904	0.94964	1	0.983607	0.938567	0.927326	0.975904	0.95614	0.931818	0.955307	0.952941	0.916201	1	0.969697	0.941176	0.961039	0.939394	0.982759
45dgr_RLNonUni	101.294	84.2	159.192	155.303	54.0357	50.1481	131.504	139.477	222.308	178.172	148.45	181.441	364.145	344.783	176.269	155.112	307.498	288.649	193.635	193.768	342.552	354.644	128.514	127.237	42.375	55.1356	272.343	313.547	74.225	91.2075	123.14	167.183	135.823	149.083	30.0625	30.0625	65.0299	71.1067	66	55.0351
45dgr_GLevNonU	4.21101	3.04444	6.04192	5.25455	2.5	2.14815	4.60839	5.03974	7.80342	6.26882	5.35	6.09744	11.3766	10.4891	6.02151	4.98758	9.42462	8.87013	6.44076	6.35545	11.5138	11.3723	5.34286	4.55556	2	2.28814	8.28671	9.2042	3.025	3.64151	4.13178	5.70857	4.81013	5.11905	1.875	1.9375	3	3.08	2.66667	2.57895
45dgr_LngREmph	1.11009	1.1	1.07186	1.09091	1.05357	1.11111	1.12587	1.11921	1.07692	1.06452	1.1125	1.13333	1.1145	1.09783	1.08065	1.0559	1.08308	1.0974	1.17536	1.12796	1.08287	1.08777	1.12857	1.08889	1.1875	1.10169	1.07343	1.10511	1.1125	1.22642	1.06977	1.06857	1.22785	1.20833	1.09375	1.09375	1.04478	1.08	1	1.05263
45dgr_ShrtREmp	0.972477	0.975	0.982036	0.977273	0.986607	0.972222	0.968531	0.970199	0.980769	0.983871	0.971875	0.972365	0.971374	0.975543	0.979839	0.986025	0.979231	0.975649	0.966693	0.968009	0.979282	0.978059	0.967857	0.977778	0.953125	0.974576	0.981643	0.97706	0.971875	0.943396	0.982558	0.982857	0.943038	0.95453	0.976562	0.976562	0.988806	0.98	1	0.986842
45dgr_Fraction	0.964602	0.967742	0.976608	0.970588	0.982456	0.964286	0.959732	0.961783	0.975	0.978947	0.963855	0.960591	0.963235	0.968421	0.973822	0.981707	0.973054	0.968553	0.95045	0.959091	0.973118	0.971576	0.958904	0.971223	0.941176	0.967213	0.976109	0.968023	0.963855	0.929825	0.977273	0.977654	0.929412	0.938547	0.969697	0.969697	0.985294	0.974026	1	0.982759
135dr_RLNonUni	87.5577	78.5682	152.378	158.193	54.0357	53.0364	143.054	138.413	194.785	164.578	151.311	188.253	372.727	344.783	181.075	155.112	285.443	281.872	194.689	199.46	314.273	354.644	128.514	118.742	45.1633	55.1356	256.95	303.188	74.225	105.162	109.634	150.798	158.193	152.953	27.2581	27.2581	58.2188	68.2432	60.125	55.0351
135dr_GLevNonU	3.86538	2.88636	5.89024	5.3494	2.57143	2.2	4.7415	5.02667	7.21525	5.82222	5.31056	6.05051	11.2879	10.4402	5.97326	5.04969	9.10127	8.65902	6.35849	6.55869	11.1534	11.4574	5.21429	4.45455	2.06122	2.22034	8.09286	9.07273	3.025	3.77477	3.92683	5.40476	4.9759	5.16471	1.77419	1.83871	2.84375	3.16216	2.59375	2.61404
135dr_LngREmph	1.25962	1.17045	1.14024	1.07229	1.05357	1.05455	1.04082	1.15333	1.24664	1.18889	1.09317	1.07576	1.09091	1.09783	1.07487	1.0559	1.18354	1.13443	1.15094	1.09859	1.17045	1.08777	1.12857	1.15909	1.12245	1.10169	1.14643	1.12727	1.1125	1.08108	1.25203	1.22024	1.07229	1.15882	1.19355	1.19355	1.21875	1.12162	1.09375	1.05263
135dr_ShrtREmp	0.935096	0.957386	0.971714	0.981928	0.986607	0.986364	0.989796	0.969074	0.948306	0.965123	0.976708	0.981061	0.977273	0.975543	0.987225	0.986025	0.961146	0.970036	0.967505	0.975352	0.957386	0.978059	0.967857	0.960227	0.969388	0.974576	0.967361	0.968182	0.971875	0.97973	0.955059	0.958168	0.981928	0.960294	0.951613	0.951613	0.962674	0.969595	0.976562	0.986842
135dr_Fraction	0.920354	0.946237	0.959064	0.976471	0.982456	0.982143	0.986577	0.955414	0.929167	0.947368	0.96988	0.975369	0.970588	0.968421	0.979058	0.981707	0.946108	0.95912	0.954955	0.968182	0.946237	0.971576	0.958904	0.94964	0.960784	0.967213	0.955631	0.959302	0.963855	0.973684	0.931818	0.938547	0.976471	0.949721	0.939394	0.939394	0.941176	0.961039	0.969697	0.982759
_AreaGr	74	61	130	129	31	33	108	116	185	141	123	156	341	316	146	125	271	257	173	171	312	325	109	101	29	37	239	284	55	82	94	136	129	136	15	15	39	50	38	32
GrMean	3.32978	3.55634	3.69624	4.06939	3.30951	3.49701	3.06464	2.8129	2.67572	3.15583	3.04124	3.60133	3.45138	3.6494	3.45362	3.66521	3.17876	3.1548	3.62002	3.74043	3.48606	3.65542	3.23848	3.56129	3.86203	4.56093	3.39555	2.95935	3.86358	3.33957	3.05609	3.59624	3.49653	3.13022	4.56355	5.42018	4.23466	3.64002	4.02183	4.0831
GrVariance	3.2504	2.22132	4.49936	4.52534	2.49877	3.16484	2.39504	2.23412	2.16482	2.52304	2.53136	4.00478	3.07622	3.35592	3.1958	3.91822	3.64828	3.10172	5.57757	5.61154	3.93392	3.77024	5.15447	3.93107	3.63643	3.38711	3.95557	3.01337	3.16364	2.35944	3.04328	3.61114	3.89829	2.88555	2.77402	3.35498	5.65741	6.13024	3.11433	3.54705
GrSkewness	0.37142	-0.188223	0.995148	0.886384	0.16741	1.18552	0.353955	0.934813	0.170372	0.361704	0.421082	0.601155	0.427269	0.511229	0.617348	0.374597	1.73431	1.20332	1.09927	0.857488	1.03989	0.614942	1.18479	0.959935	-0.115259	-0.447555	1.22654	1.04963	0.264198	0.650808	0.907297	0.458961	0.699186	0.646063	0.0260835	-0.195307	0.321297	1.31481	-0.115456	0.214653
GrKurtosis	-0.549675	-0.482712	0.649897	1.21678	0.16263	3.06437	-0.115135	1.87206	-0.642729	-0.748587	-0.220632	-0.208511	-0.106945	0.114064	-0.11863	-0.3857	5.45676	2.91489	1.58629	0.307162	1.99696	0.0466073	0.878619	0.541759	-1.26052	-0.890454	1.88084	1.35749	-0.126149	0.0192846	0.789002	-0.361512	-0.198102	-0.263714	-0.420661	-1.1861	-0.733399	2.15368	-0.603298	-0.969964
GrNonZeros	0.986486	0.983607	0.984615	0.984496	0.935484	0.969697	0.962963	0.965517	0.935135	0.992908	0.97561	0.980769	0.973607	0.981013	0.993151	0.984	0.98893	0.980545	0.942197	0.959064	0.971154	0.978462	0.963303	0.990099	1	1	0.987448	0.971831	0.981818	1	0.978723	0.977941	0.992248	0.992647	1	1	0.974359	0.96	0.973684	1
_AreaARM	79	60	133	129	32	32	105	115	195	149	129	162	340	313	149	125	274	258	175	174	309	322	110	102	29	38	240	283	59	83	99	141	132	137	14	14	46	53	41	35
Teta1	0.835755	0.814394	0.727311	0.661483	0.811551	0.832514	0.899996	0.838094	0.88926	0.904188	0.753158	0.8246	0.582244	0.530946	0.674619	0.688333	0.820763	0.784003	0.758484	0.750772	0.617415	0.593473	0.786564	0.620948	0.933351	0.945246	0.65802	0.723476	0.820068	0.752844	0.68044	0.644378	0.896416	0.877826	0.994328	0.96781	0.675891	0.832621	0.982911	0.971742
Teta2	-0.657424	-0.611015	-0.422843	-0.418912	-0.550684	-0.550397	-0.814595	-0.759535	-0.628171	-0.601872	-0.595226	-0.616	-0.376203	-0.301925	-0.496652	-0.53668	-0.532459	-0.469963	-0.395863	-0.44026	-0.43709	-0.426669	-0.528223	-0.403991	-0.809382	-0.795035	-0.351613	-0.437825	-0.478361	-0.394378	-0.53027	-0.490108	-0.748154	-0.757241	-1.04872	-0.952316	-0.431017	-0.319536	-0.842194	-0.888122
Teta3	0.593361	0.594469	0.547445	0.675984	0.183384	0.149517	0.831371	0.833737	0.622651	0.597525	0.730736	0.678277	0.705197	0.685766	0.789443	0.753217	0.609305	0.580261	0.274897	0.341243	0.682949	0.623163	0.593634	0.664179	0.65834	0.644791	0.641673	0.6503	0.429634	0.416558	0.947467	0.823204	0.603092	0.637025	1.09978	1.05145	0.625093	0.250168	0.659631	0.656169
Teta4	0.18054	0.17083	0.139949	-0.07182	0.352279	0.341502	0.0563248	0.0842539	0.124872	0.104328	0.0408468	0.0325239	0.0492203	0.0571995	-0.011912	-0.01348	0.0885534	0.116897	0.271899	0.213609	-0.0325271	0.020627	0.241052	0.126206	0.0990655	0.0845804	0.0588372	0.069875	0.220058	0.21167	-0.123226	-0.0529161	0.181363	0.173401	-0.06542	-0.21402	0.0972537	0.402601	0.141246	0.184517
Sigma	0.287471	0.284363	0.517807	0.600902	0.249795	0.224444	0.233046	0.214282	0.202307	0.25216	0.388	0.373305	0.458846	0.481234	0.437666	0.475329	0.325543	0.326583	0.383009	0.400441	0.50292	0.563071	0.350407	0.456982	0.377589	0.357741	0.373503	0.342369	0.421872	0.408276	0.359413	0.452876	0.296793	0.264663	0.332647	0.399666	0.609939	0.451456	0.21019	0.215233
WavEnLL_s-1	16154.3	14075.3	16551.7	17038.5	13711.3	15433.3	14996.8	15551.1	15476.3	15680	15647.7	15735.6	15777.4	16118.2	15761.4	16256.3	15900.7	15915.9	15446.7	14828.4	16546.7	16219.2	15680.2	14101.2	13898.9	15547	15908.2	15979.1	16511.9	16819.3	16346.9	16610.1	14706.2	15136.8	14064	12832	15770.5	15394.9	21616.2	24542.5
WavEnLH_s-1	90.4286	97.0441	192.332	232.582	236.753	201.089	120.589	101.918	100.284	181.697	223.295	216.799	169.065	164.088	215.644	199.232	178.944	206.268	247.111	259.62	171.505	185.469	234.936	310.987	200.58	204.771	176.498	130.831	205.487	164.432	152.031	162.289	192.252	150.458	87.3125	136.897	243.688	198.11	254.668	338.917
WavEnHL_s-1	108.307	111.897	196.26	227.872	585.396	514.326	199.156	168.484	58.7842	92.042	118.369	117.795	343.176	355.56	358.432	350.326	139.375	157.549	189.932	192.139	296.959	344.943	141.746	203.328	205.372	221.41	190.393	149.66	146.195	125.325	300.881	319.294	248.164	197.344	325.62	428.094	271.198	157.82	103.463	127.25
WavEnHH_s-1	5.82857	6.85294	40.2602	55.7092	22.3363	17.0625	6.79444	5.34239	4.44521	7.18295	24.9522	24.1281	35.6165	39.759	29.4068	46.4036	15.617	15.9115	29.1621	29.7453	45.6869	55.5035	24.6384	47.3565	19.8993	17.7986	22.5256	16.9407	20.0391	15.3179	23.9062	27.5625	14.076	10.1745	17.7933	26.8616	77.8397	31.16	18.5767	23.7619

## Sheet: inter-observe
	1		2		3		4		5		6		7		8		9		10		11		12		13		14		15		16		17		18		19		20
	1	2	1	2	1	2	1	2	1	2	1	2	1	2	1	2	1	2	1	2	1	2	1	2	1	2	1	2	1	2	1	2	1	2	1	2	1	2	1	2
GeoX	79.7257	78.3562	85.0058	82.3818	71.2807	70.5652	72.5839	72.5306	76.4333	74.9684	97.1506	96.4937	72.3407	71.2569	83.712	84.8506	90.8024	90.7526	81	80.541	75.4194	76.1692	77.2945	77.2069	86.0784	85.4118	77.1877	77.46	86.9157	87.3226	94.2576	91.5591	89.4941	89.7929	74.697	75.5	103.132	102.983	78.9242	78.7647
GeoY	91.2389	91.2192	114.468	111.645	107.088	110.196	110.926	111.116	106.354	106.051	98.9639	98.2848	103.203	104.122	110.393	110.877	90.3892	90.0348	96.2793	95.3661	109.304	109.919	117.637	117.612	112.686	112.235	106.863	108.627	101.41	99.1774	91.8409	93.8346	110.747	111.071	112.485	114.286	87.6765	85.3707	111.258	111.338
GeoF	113	73	171	220	57	46	149	147	240	158	166	158	408	288	191	154	334	287	222	183	372	260	146	116	51	34	293	300	83	62	132	127	170	140	33	14	68	116	66	68
GeoSpol	11.9948	9.64088	14.7555	16.7366	8.51908	7.65304	13.7736	13.6809	17.4808	14.1835	14.5381	14.1835	22.7921	19.1492	15.5945	14.0028	20.6219	19.116	16.8125	15.2644	21.7634	18.1946	13.6343	12.153	8.05824	6.57952	19.3147	19.5441	10.28	8.88487	12.9641	12.7162	14.7123	13.3512	6.48204	4.22201	9.30485	12.153	9.167	9.30485
GeoSmax	13.9284	9.84886	15.8114	17.2627	11.0454	8.06226	19.0263	16.4924	24.5153	20.0998	18.7883	15.8114	27.1662	21.3776	17.0294	16.2788	25.1794	23.7697	20.2485	18.4391	25.7099	20.8806	14.8661	13.0384	9.05539	7.28011	20.6155	23.1948	13.3417	9.43398	14.7648	15.5242	15.6525	14.8661	7.81025	3.60555	13.6015	15.2971	10.4403	11.1803
GeoAox	-68.9625	23.9625	-71.5651	10.008	5.19443	-29.7449	3.01279	14.0362	-78.2317	84.2894	-64.7989	-55.3048	6.34019	10.7843	-40.2364	-10.6197	83.1572	75.3791	-57.0948	-49.3987	13.4957	16.6992	42.2737	57.5288	6.34019	-15.9454	-67.1663	-7.43141	-77.0054	-57.9946	-61.6992	75.0686	-26.5651	-19.6538	50.1944	56.3099	-72.8973	78.6901	73.3008	-79.6952
GeoUg	111.104	70.3051	118.175	130.66	73.6838	55.1127	118.175	109.225	159.388	135.246	123.589	117.675	196.43	151.681	129.832	112.347	183.53	165.631	141.903	124.004	175.823	143.56	106.104	94.033	61.3553	50.6985	157.095	166.045	79.2548	66.7696	109.897	101.104	117.347	100.69	49.2843	24.7279	81.5477	100.276	78.4264	81.0477
GeoUw	40.2576	28.8438	45.6303	51.6259	27.6989	22.423	45.7153	43.0415	60.0516	49.6793	47.6986	45.1292	74.0628	59.726	49.6526	43.7961	68.2954	62.4916	54.6176	48.5922	69.3864	57.4446	42.2355	37.2264	25.0775	20.6209	60.3334	63.0455	32.7477	26.6317	40.5954	41.3655	45.1619	40.7208	20.4882	10.8284	31.4377	39.6998	29.1138	30.0631
GeoFmax	13.9284	9.84885	15.8113	17.2626	11.045	8.0622	19.0262	16.4924	24.5143	20.0997	18.7883	15.8113	27.1642	21.3769	17.0286	16.2778	25.1792	23.7686	20.2475	18.439	25.7087	20.8805	14.8661	13.0384	9.05473	7.27986	20.6152	23.1943	13.3414	9.43382	14.7648	15.5235	15.6524	14.8661	7.81003	3.60555	13.6014	15.2971	10.4403	11.18
GeoFmin	11.0646	8.05701	13	14.8492	5	6.26457	9.94707	10.2283	12.277	9	11.9316	12.5291	21	16.5636	13.4344	11.3426	16	15	14.426	12.0208	19	16.2635	11.3137	10.5407	6.17458	5.54816	18.2262	16.5903	7	7	10	10.942	12.9727	11.1863	4.47812	3	5.69717	10	7	6.8655
GeoFh	13	9	15	16	5	7	10	11	24	20	17	15	21	17	15	12	25	23	17	14	19	18	14	11	7	7	19	17	13	9	14	15	13	12	6	3	13	15	10	11
GeoFv	12	9	13	17	11	7	19	16	13	9	12	13	27	21	16	16	16	15	17	16	25	20	12	12	9	7	19	23	7	7	10	12	14	14	7	3	6	10	7	7
GeoMmin	3.25598	3.09389	5.55958	7.10945	2.28239	2.5642	4.41672	4.55903	5.37167	3.12459	5.0384	4.94995	8.39705	7.25796	4.57931	4.8065	6.50049	6.56963	5.22611	5.05169	8.72885	7.73383	5.45461	4.56601	2.32772	2.25993	7.96982	6.41802	3.41068	2.90273	4.45525	4.44756	5.94899	5.12607	1.76488	1.37951	2.3273	4.15225	2.50078	2.35004
GeoMmax	7.6111	5.05554	8.12779	9.0332	6.0494	4.11375	9.94333	8.26202	12.6394	10.4562	9.58097	8.6505	14.3	10.9038	9.06616	8.33152	13.0034	12.6012	10.8419	9.79687	13.0734	10.4707	7.73353	6.71104	4.68693	4.02071	10.5455	11.9009	6.94082	4.85998	7.51367	8.52101	8.11331	7.47028	4.40656	1.97562	7.06931	8.02581	5.55517	5.918
GeoMaver	5.6144	4.3806	6.91673	7.9624	3.93249	3.38763	6.55867	6.45971	8.59749	6.97714	7.00108	6.74333	10.9996	9.16703	7.38923	6.58737	9.93458	9.17055	8.0645	7.33256	10.5134	8.72085	6.43501	5.64984	3.62393	2.93004	9.22137	9.3948	4.77499	3.9975	6.06239	6.0139	6.93082	6.26601	2.90903	1.66584	4.42532	5.70336	4.15445	4.28123
GeoFt	113	73	171	220	57	46	149	147	240	158	166	158	408	288	191	154	334	287	222	183	372	260	146	116	51	34	293	300	83	62	132	127	170	140	33	14	68	116	66	68
GeoUl	111.104	70.3051	118.175	130.66	73.6838	55.1127	118.175	109.225	159.388	135.246	123.589	117.675	196.43	151.681	129.832	112.347	183.53	165.631	141.903	124.004	175.823	143.56	106.104	94.033	61.3553	50.6985	157.095	166.045	79.2548	66.7696	109.897	101.104	117.347	100.69	49.2843	24.7279	81.5477	100.276	78.4264	81.0477
GeoS1	4	4	5	6	3	3	5	4	6	4	5	5	8	7	5	5	7	7	6	5	8	6	5	4	3	2	7	7	3	3	5	4	5	5	2	2	3	4	3	3
GeoS2	0	0	0	0	0	0	0	0	0	0	0	0	0	0	0	0	0	0	0	0	0	0	0	0	0	0	0	0	0	0	0	0	0	0	0	0	0	0	0	0
GeoLsz	27.5563	14.6569	37.6274	34.7279	16.0711	15.8995	37.2132	20.4853	42.2132	35.9706	27.1421	33.5563	48.2843	31.7279	36.2132	33.1421	60.3553	42.8701	37.799	26.1421	40.7279	38.5563	29.3848	19.8995	15.8995	16.4853	44.2132	41.2132	12.8284	14.4853	32.3848	23.4853	30.6274	18.0711	13.0711	5.82843	18.7279	23.0711	20.3137	24.3137
GeoS	11.3798	8.48528	13	14.8492	5	6.26457	9.94707	10.3051	12.277	9	12	13	21.4429	17.6777	13.4344	12.0208	16	15	16.232	12.0208	19.799	16.8702	12	11	6.17458	5.80896	18.3848	16.5903	7	7	10	11.3137	13	11.3137	4.47812	3	5.69717	11.0646	7	6.8655
GeoL	12.4758	9.19239	15	16.9706	11	7.6074	18.6736	16.096	24.0643	20	17	15	23.8269	19.0919	16.5576	14.8492	25	23	17.5062	18.3848	21.9203	16.9625	14	12	8.40414	5.82095	19.0919	22.0096	13	9	14	13.435	14	13.435	7.6074	3	13.5986	12.9967	10	11.1788
GeoSxL	141.972	78	195	252	55	47.6571	185.747	165.871	295.437	180	204	195	510.916	337.5	222.441	178.5	400	345	284.162	221	434	286.161	168	132	51.892	33.8137	351	365.146	91	63	140	152	182	152	34.0668	9	77.4735	143.803	70	76.7481
GeoD1	4	3.53553	5.70088	7.01783	2.54951	2.54951	4.52769	4.60977	5.52268	4.30116	5.02494	5.31507	8.94427	7.61577	5.59017	5	7.10634	6.94622	6.0208	5.59017	9.01388	7.61577	5.52268	4.71699	2.54951	2.5	8.13941	7.2111	3.53553	3.04138	4.71699	4.60977	6.04152	5.22015	2	1.58114	2.54951	4.30116	3.04138	2.54951
GeoD2	7.15891	5.14782	8.20061	8.86002	5.59017	4.03113	9.51315	8.24621	12.2577	10.0499	9.48683	8.13941	13.5831	10.6888	8.74643	8.13941	13.0096	11.8849	10.2956	9.30054	12.855	10.4403	7.76209	6.5192	4.60977	3.80789	10.3078	11.5974	7	4.92443	7.5	7.76209	8.06226	7.43303	4.272	2.06155	6.80074	8	5.38516	5.70088
GeoFd2	161.007	83.2522	211.272	246.615	98.1748	51.0509	284.314	213.628	472.024	317.301	282.743	208.131	579.624	358.927	240.332	208.131	531.715	443.75	333.009	271.748	519.148	342.434	189.281	133.518	66.7588	45.5531	333.794	422.544	153.938	76.1836	176.715	189.281	204.204	173.573	57.3341	13.3518	145.299	201.062	91.1062	102.102
GeoLmaxE	14.3178	10.1286	15.8947	17.7577	11.9261	8.06226	19.0991	16.9608	24.5153	20.0998	18.9737	16.2788	27.2061	21.3851	17.3355	17.025	26.0192	23.7697	20.2506	18.6011	25.9114	21.372	14.923	13.0384	9.68148	7.72015	20.6155	23.617	13.6589	9.82993	15	15.5242	15.8241	15.9662	8.16228	4.49661	13.6015	15.5156	10.7703	11.4018
GeoLminE	14.3178	10.1039	15.879	17.3013	7.19251	8.06226	11.8227	14.0417	24.5153	20.0998	18.9737	16.2788	24.4167	21.1736	17.3211	13.3922	26.0192	23.7697	20.2012	18.6011	23.4607	18.3238	14.6355	13.0384	8.55751	7.11342	20.6155	20.3411	13.6406	9.80446	15	15.5242	15.7608	12.4065	7.85002	3.34956	13.6015	15.4995	10.7703	11.4018
GeoFE	161.007	80.376	198.229	241.3	67.3704	51.0509	177.345	187.05	472.024	317.301	282.743	208.131	521.727	355.627	235.832	179.073	531.715	443.75	321.296	271.748	477.443	307.574	171.536	133.518	65.0698	43.1315	333.794	377.302	146.332	75.6944	176.715	189.281	195.879	155.575	50.3236	11.8294	145.299	188.876	91.1062	102.102
GeoW1	1	1.00245	1.00099	1.02638	1.65813	1	1.61546	1.20789	1	1	1	1	1.11424	1.00999	1.00083	1.27126	1	1	1.00245	1	1.10446	1.16635	1.01965	1	1.13134	1.08529	1	1.16105	1.00134	1.0026	1	1	1.00402	1.28693	1.03978	1.34245	1	1.00104	1	1
GeoW2	0.115035	0.185592	0.15387	0.161936	0.131929	0.190311	0.134074	0.154839	0.118716	0.108547	0.13657	0.143383	0.132878	0.157304	0.14239	0.153324	0.124606	0.131465	0.138541	0.149552	0.151217	0.158532	0.162967	0.164857	0.170245	0.166226	0.149194	0.136735	0.166049	0.174761	0.137345	0.156126	0.155138	0.173527	0.170729	0.287715	0.128498	0.14497	0.134843	0.130088
GeoW6	0.0782423	0.0766397	0.0549946	0.0472619	0.10287	0.0953419	0.0631146	0.0591284	0.0528488	0.0681174	0.0592466	0.0592677	0.0383123	0.0419111	0.0540927	0.0580537	0.0437272	0.0459251	0.0508662	0.0539229	0.0376118	0.043939	0.0578322	0.0645078	0.0957353	0.118661	0.0426664	0.0440449	0.0759867	0.0856992	0.0662524	0.0633512	0.0549303	0.0572332	0.118846	0.140556	0.0954318	0.0687904	0.0945602	0.0948467
GeoW3	109.24	67.7097	81.6688	77.6007	95.2508	66.0306	93.7273	81.1577	105.853	115.769	92.014	87.642	94.5704	79.8861	88.2531	81.9596	100.849	95.5875	90.7049	84.0267	83.1018	79.2671	77.1101	76.2259	73.8133	75.5981	84.2286	91.9034	75.6787	71.906	91.495	80.4885	81.0015	72.4175	73.6042	43.6764	97.7946	86.6828	93.1924	96.599
GeoW4	2.75983	2.43744	2.58984	2.53091	2.66017	2.45787	2.58502	2.53768	2.65419	2.72238	2.59105	2.60752	2.65221	2.53962	2.61481	2.56522	2.6873	2.65045	2.59812	2.55192	2.53397	2.4991	2.5122	2.52597	2.44663	2.4586	2.60379	2.63374	2.42017	2.50715	2.70713	2.44416	2.59835	2.47269	2.4055	2.28361	2.59395	2.52585	2.69379	2.69592
GeoW5	4.10069	4.9806	4.54456	6.33496	3.54675	2.89317	4.00396	7.17588	5.68542	4.39248	6.11595	4.7085	8.44996	9.07718	5.27432	4.64665	5.53389	6.69465	5.87317	7.00019	9.13378	6.74338	4.96856	5.82929	3.20765	2.06245	6.62698	7.27922	6.47001	4.28021	4.07599	5.40764	5.55058	7.74719	2.52466	2.40202	3.63094	5.02794	3.24904	2.79678
GeoW5b	0.148811	0.339814	0.120778	0.182417	0.220691	0.181966	0.107595	0.350295	0.134684	0.122113	0.225331	0.140316	0.175004	0.286094	0.145646	0.140204	0.0916885	0.156161	0.155379	0.267774	0.224263	0.174897	0.169086	0.292937	0.201745	0.125108	0.149887	0.176624	0.504349	0.295487	0.125861	0.230257	0.181229	0.428707	0.193149	0.412122	0.193879	0.217933	0.159943	0.115029
GeoW7	1.78973	1.45602	1.43848	1.2625	2.19265	1.58114	2.1011	1.78885	2.21951	2.33655	1.88795	1.53138	1.51863	1.40351	1.56461	1.62788	1.83071	1.71098	1.71001	1.66373	1.42613	1.37088	1.40549	1.38207	1.8081	1.52315	1.2664	1.60827	1.9799	1.61914	1.59	1.68383	1.33447	1.42391	2.136	1.30384	2.66747	1.85996	1.77063	2.23607
GeoRs	8.69304	5.38816	6.499	6.17526	7.57982	5.25455	7.45858	6.45833	8.42349	9.21262	7.32224	6.97433	7.52568	6.35713	7.02296	6.52214	8.02528	7.60661	7.21806	6.68663	6.61303	6.30788	6.13623	6.06587	5.87387	6.01591	6.7027	7.31344	6.02232	5.7221	7.28094	6.40507	6.44589	5.7628	5.85724	3.47566	7.78225	6.898	7.41602	7.68711
GeoRf	1.08333	1	1.15385	0.941176	0.454545	1	0.526316	0.6875	1.84615	2.22222	1.41667	1.15385	0.777778	0.809524	0.9375	0.75	1.5625	1.53333	1	0.875	0.76	0.9	1.16667	0.916667	0.777778	1	1	0.73913	1.85714	1.28571	1.4	1.25	0.928571	0.857143	0.857143	1	2.16667	1.5	1.42857	1.57143
GeoRff	0.794391	0.818066	0.822195	0.860197	0.452692	0.777029	0.52281	0.620184	0.500809	0.447767	0.635054	0.792415	0.773077	0.77484	0.788928	0.696813	0.635445	0.631085	0.712482	0.651923	0.739051	0.778882	0.761043	0.808441	0.681918	0.762125	0.884117	0.715276	0.524681	0.742011	0.677289	0.704866	0.828801	0.752472	0.57338	0.832051	0.418868	0.653721	0.670482	0.614089
GeoRc	0.339167	0.430804	0.392263	0.402413	0.363221	0.436247	0.366161	0.393496	0.344551	0.329464	0.369554	0.378659	0.364525	0.396615	0.377346	0.391566	0.352996	0.36258	0.372211	0.38672	0.388866	0.398161	0.403691	0.406026	0.412608	0.407708	0.386256	0.369776	0.407491	0.418044	0.370601	0.395128	0.393875	0.416565	0.413194	0.536391	0.358466	0.380749	0.36721	0.360677
GeoRc1	11.9948	9.64088	14.7555	16.7366	8.51908	7.65304	13.7736	13.6809	17.4808	14.1835	14.5381	14.1835	22.7921	19.1492	15.5945	14.0028	20.6219	19.116	16.8125	15.2644	21.7634	18.1946	13.6343	12.153	8.05824	6.57952	19.3147	19.5441	10.28	8.88487	12.9641	12.7162	14.7123	13.3512	6.48204	4.22201	9.30485	12.153	9.167	9.30485
GeoRc2	35.3655	22.3788	37.6163	41.5905	23.4543	17.5429	37.6163	34.7675	50.7349	43.0502	39.3397	37.4572	62.5256	48.2816	41.3268	35.7611	58.4196	52.722	45.1691	39.4716	55.9663	45.6965	33.774	29.9316	19.53	16.1378	50.005	52.8538	25.2276	21.2534	34.9813	32.1824	37.3526	32.0506	15.6877	7.87114	25.9574	31.9187	24.9639	25.7983
GeoRm	10.7936	8.28497	9.19725	8.94003	10.0126	8.16912	9.92416	9.1653	10.6093	11.1409	9.82386	9.56358	9.97319	9.08534	9.60035	9.21539	10.3316	10.032	9.74658	9.34341	9.28632	9.04619	8.90856	8.85159	8.69443	8.81094	9.35583	9.81735	8.81616	8.56836	9.79329	9.12329	9.15551	8.60233	8.68069	6.45725	10.1587	9.50562	9.89295	10.0903
GeoRb	9.98566	8.44941	12.9524	14.7473	6.82873	6.66681	11.2438	11.4837	13.7402	10.7696	12.0751	12.2203	19.6342	16.7064	13.4363	11.9769	17.278	16.15	14.2872	12.9148	18.9584	15.9484	11.9473	10.6736	6.87501	5.6443	17.0241	16.7345	8.45671	7.73123	11.1339	10.7926	12.9611	11.6672	5.17935	3.7929	7.00894	10.2838	7.65302	7.59538
GeoRd	1.1221e+06	334553	1.51015e+06	2189727	346738	170274	1.49163e+06	1.30181e+06	3966576	2.26397e+06	1.74929e+06	1.38518e+06	8.10199e+06	3.72092e+06	2.03311e+06	1.36184e+06	6.3074e+06	4419290	2.7104e+06	1.83263e+06	6.0316e+06	3.10905e+06	1.05416e+06	731287	224607	100079	3.84544e+06	4.64125e+06	484604	276056	1.04282e+06	994255	1.35478e+06	994123	138192	33614	543507	910314	439642	456595
GeoRh	0.982673	0.995391	0.996554	0.998228	0.968505	0.993474	0.976289	0.983949	0.967909	0.959479	0.981832	0.992022	0.99178	0.99521	0.991393	0.989296	0.983958	0.986116	0.988348	0.987476	0.994933	0.996827	0.996804	0.996906	0.987896	0.991465	0.998285	0.990099	0.977345	0.992815	0.990575	0.98826	0.998016	0.995552	0.968846	1.01056	0.954603	0.986118	0.981708	0.974437
GeoW8	0.912146	0.923077	0.866667	0.875	0.454545	0.823483	0.532682	0.640224	0.510174	0.45	0.705882	0.866667	0.899945	0.925926	0.811369	0.809524	0.64	0.652174	0.927213	0.653846	0.903226	0.994561	0.857143	0.916667	0.734707	0.997939	0.962963	0.753775	0.538462	0.777778	0.714286	0.842105	0.928571	0.842105	0.588653	1	0.418953	0.851336	0.7	0.614152
GeoW9	1.25639	1.06849	1.14035	1.14545	0.964912	1.03602	1.24663	1.12837	1.23099	1.13924	1.22892	1.23418	1.25224	1.17188	1.16461	1.15909	1.1976	1.20209	1.28001	1.20765	1.16667	1.10062	1.15068	1.13793	1.01749	0.99452	1.19795	1.21715	1.09639	1.01613	1.06061	1.19685	1.07059	1.08571	1.03233	0.642857	1.13932	1.23968	1.06061	1.12865
GeoW10	0.427793	0.61198	0.684021	0.787035	0.377292	0.623325	0.44419	0.551806	0.424994	0.298826	0.525875	0.572216	0.587205	0.665635	0.505099	0.576906	0.499907	0.521349	0.48203	0.515644	0.667681	0.738617	0.705319	0.680373	0.496642	0.562072	0.755756	0.539289	0.491395	0.597273	0.592952	0.521953	0.733238	0.686195	0.40051	0.698271	0.329211	0.517362	0.450171	0.397101
GeoSigR	1.14703	0.218127	0.355784	0.247465	1.06059	0.201265	2.13921	1.39879	5.00082	4.21993	1.85396	0.759336	2.0287	0.83018	0.974399	0.969768	3.26033	2.40233	1.56293	1.39571	1.14532	0.505284	0.293025	0.228723	0.369235	0.207263	0.310862	1.7916	1.105	0.273789	0.72903	0.892974	0.215561	0.380209	0.608534	0.0423237	1.9414	0.950827	0.68489	1.00998
GeoW11	2.86381	1.79184	2.81139	2.41343	6.04536	1.79769	9.07923	6.26409	12.2383	11.0998	6.85673	3.28225	6.16616	4.81392	3.59503	4.93621	9.17936	8.76973	5.82249	6.41827	6.70992	4.61716	3.55236	2.49766	2.88081	1.73195	2.3893	6.60453	6.34166	2.43398	4.76482	4.58219	2.67973	3.67977	3.33213	0.605551	7.9043	5.29706	3.44031	4.31484
GeoW12	2.3299	3.01031	2.736	2.95302	1.86885	2.83077	1.64641	2.16176	1.59734	1.56436	1.88102	2.528	2.21138	2.52079	2.63448	2.32453	2.10726	2.03186	2.16585	2.15294	2.25113	2.38532	2.64253	2.72941	2.4878	2.56604	2.75765	2.23048	1.86517	2.78652	2.42202	2.10788	2.77551	2.53394	2.16393	4.30769	1.47027	1.98291	2.42202	2.176
GeoW13	0.12326	0.134916	0.0924643	0.0784667	0.193778	0.175266	0.127693	0.112193	0.102147	0.127214	0.113183	0.100072	0.0665837	0.0742276	0.0891591	0.105707	0.0753873	0.0828214	0.0912093	0.10076	0.0691127	0.08031	0.101822	0.1124	0.177557	0.214121	0.0703602	0.0773161	0.160743	0.152161	0.111855	0.122238	0.0920734	0.106186	0.236674	0.257539	0.200022	0.131871	0.158186	0.164417
GeoW14	0.0418192	0.0764126	0.04326	0.042766	0.0422995	0.0877784	0.0216333	0.0327691	0.0162892	0.0194574	0.0250291	0.0399712	0.0203505	0.0294794	0.0386755	0.0356987	0.0209225	0.0213702	0.026741	0.0291899	0.0218897	0.028559	0.044439	0.0523341	0.068683	0.0881181	0.0334414	0.0240407	0.0349501	0.0738425	0.0410099	0.0339452	0.0443302	0.0426128	0.0692659	0.298685	0.0270241	0.0324067	0.0579968	0.0486568
GeoW15	0.933583	1.17131	1.05924	1.09275	1.31412	1.15963	1.00241	1.10953	1.0153	1.11207	0.942831	1.01549	0.91059	1.03559	1.06299	1.06193	1.05558	1.02489	0.967668	1.05121	0.969614	0.974827	1.10525	1.07466	1.16136	1.07177	0.992857	0.992627	1.13157	1.19539	1.1383	0.951939	1.06597	1.0719	1.20133	1.64795	1.11731	0.965518	1.14985	1.12796
GeoM2x	11.6327	6.3389	15.8187	16.6451	2.5177	3.72401	6.99464	8.19464	38.9206	28.0686	20.6701	15.8069	25.7246	19.0243	13.9328	9.6725	40.8831	33.6984	19.9369	15.6144	24.6521	18.9483	12.7831	9.52616	3.56248	2.7128	23.7702	17.8351	10.9929	6.3153	14.6155	13.3174	12.6264	9.87852	2.33242	1.10714	12.056	12.81	7.64578	9.32699
GeoM2y	8.74822	5.541	11.9215	18.7743	8.57125	3.85302	20.9543	17.8846	9.63707	6.18731	9.40833	10.7986	43.0003	28.2734	18.228	16.6406	18.591	16.5632	18.4896	16.3414	36.6255	23.3512	10.9847	9.27192	5.19569	3.06228	23.3739	33.314	4.33822	3.92014	7.75499	8.72069	14.7537	13.0378	4.12856	1.06122	2.92474	7.44018	4.19123	3.42971
GeoM2xy	1.44608	0.935635	-1.08461	-0.923719	0.431517	-0.914934	1.62029	2.97265	-1.17014	0.507931	-3.36805	-2.10896	3.12922	2.17711	-2.34242	-2.82362	4.35536	3.91454	-5.83333	-6.02867	1.8081	1.41367	1.7713	1.42509	-0.896963	-0.185121	-1.66721	1.80507	-1.91726	-0.508845	-1.12569	2.39953	-1.62796	-2.06378	1.35905	0	-2.41306	0.178805	-0.919881	-0.876298
GeoEr	4.19983	3.24229	4.95445	5.60316	3.06574	2.58529	4.887	4.7551	6.38805	5.34308	5.08932	4.82979	7.76149	6.45905	5.31463	4.79564	7.18145	6.60736	5.78574	5.26976	7.34614	6.11351	4.58383	4.0788	2.76581	2.24691	6.46457	6.68997	3.624	3.00341	4.42556	4.37897	4.92624	4.49708	2.342	1.39671	3.52317	4.19204	3.20091	3.30951
GeoEr2	20.3809	11.8799	27.7402	35.4194	11.089	7.57703	27.9489	26.0792	48.5576	34.2559	30.0784	26.6056	68.7249	47.2977	32.1608	26.3131	59.4741	50.2616	38.4265	31.9558	61.2776	42.2995	23.7678	18.7981	8.75817	5.77509	47.1441	51.149	15.3311	10.2354	22.3705	22.0381	27.3801	22.9163	6.46097	2.16837	14.9808	20.2502	11.837	12.7567
GeoEl	1.13397	1.07833	1.81964	2.20515	0.730822	0.756071	1.48918	1.56207	1.86685	1.31993	1.61708	1.68746	2.89531	2.53375	1.85127	1.63764	2.43049	2.31285	2.00915	1.82868	2.92145	2.37764	1.71821	1.46098	0.7685	0.62668	2.55758	2.41193	1.08623	0.929156	1.4851	1.43535	1.90432	1.66139	0.509952	0.285714	0.760608	1.30946	0.808661	0.829846
GeoEl2	2.38938	2.09589	5.61988	8.11364	1.08772	1.13043	3.79195	4.08163	5.77083	3	4.42771	4.85443	13.6078	10.4757	5.73298	4.51948	9.52994	8.7561	6.68468	5.60109	13.8737	9.36538	5.08219	3.73276	1.15686	0.852941	10.802	9.48	2.09639	1.64516	3.87121	3.53543	6.22353	4.68571	0.606061	0.285714	1.11765	3.01724	1.31818	1.30882
GeoNc	39	25	41	45	26	20	41	38	55	47	43	40	67	52	45	39	63	57	49	43	60	49	37	33	22	17	54	57	28	24	38	35	41	35	18	10	29	35	28	28
GeoNv	9	13	16	17	9	13	14	14	15	15	11	15	16	18	14	16	13	15	16	15	15	19	10	11	11	9	17	18	11	11	13	13	12	16	10	7	11	11	10	11
GeoNl	39	25	41	45	26	20	41	38	55	47	43	40	67	52	45	39	63	57	49	43	60	49	37	33	22	17	54	57	28	24	38	35	41	35	18	10	29	35	28	28
GeoNsz	32	15	39	35	18	17	39	25	42	40	31	36	56	37	41	35	63	45	44	30	42	39	33	22	19	16	46	47	15	18	34	26	36	23	15	7	23	24	21	24
GeoNi	5	4	6	5	3	5	5	6	4	6	3	5	7	6	7	5	7	9	5	4	4	5	5	4	4	4	6	7	2	4	6	6	5	7	3	3	4	3	5	5
GeoNx	3	2	4	3	1	3	3	4	2	4	1	3	5	4	5	3	5	7	3	2	2	3	3	2	2	2	4	5	0	2	4	4	3	5	1	1	2	1	3	3
GeoNo	0	0	0	0	0	0	0	0	0	0	0	0	0	0	0	0	0	0	0	0	0	0	0	0	0	0	0	0	0	0	0	0	0	0	0	0	0	0	0	0
GeoXo	-1.72566	-0.856164	0.494152	0.118182	0.219298	-0.0652174	-0.0838926	-0.0306122	-2.93333	-1.46835	0.349398	0.506329	-0.340686	0.743056	-0.712042	0.149351	-3.3024	0.747387	1	-0.0409836	0.580645	-0.169231	0.205479	0.293103	-0.578431	0.0882353	-0.687713	0.54	-0.415663	-0.822581	0.242424	-1.05906	0.00588235	0.207143	0.30303	0	0.367647	-0.482759	-0.924242	-2.26471
GeoYo	-1.23894	-0.719178	0.0321637	0.354545	-0.587719	0.304348	-0.426175	-0.115646	0.145833	-0.550633	0.0361446	-0.78481	0.796569	0.878472	-0.89267	0.123377	-0.889222	-0.0348432	0.220721	0.63388	0.196237	0.0807692	-0.136986	0.387931	0.813725	-0.235294	0.136519	-0.626667	0.0903614	-0.177419	0.159091	-0.834646	-0.247059	-0.571429	0.515152	0.214286	-0.176471	0.12931	0.242424	0.161765
GeoXYo	2.12435	1.11814	0.495198	0.373724	0.6273	0.311257	0.434353	0.119629	2.93696	1.5682	0.351262	0.933968	0.866365	1.15058	1.14187	0.19372	3.42002	0.748199	1.02407	0.635203	0.612909	0.187517	0.246956	0.48621	0.998365	0.251294	0.701133	0.827231	0.425371	0.841497	0.289965	1.34842	0.247129	0.607815	0.597669	0.214286	0.407807	0.499777	0.955507	2.27048
_Area	113	73	171	220	57	46	149	147	240	158	166	158	408	288	191	154	334	287	222	183	372	260	146	116	51	34	293	300	83	62	132	127	170	140	33	14	68	116	66	68
_MinNorm	-5077	2440	22773	25871	21772	8914	-907	707	-1017	1100	167	204	179	327	2861	3143	340	1322	-398	1163	23109	27982	2127	3323	1684	3464	2778	2217	302	383	1272	1616	2863	5469	443	2492	1883	1793	-12	88
_MaxNorm	67400	70351	62726	60800	69583	80011	80486	79742	7817	7340	658	634	1289	1239	6804	6770	9845	9585	16041	15818	59214	56896	10495	10006	11388	11101	10811	10999	1219	1240	4291	4286	23100	22449	7501	7297	6436	6426	3935	3804
Mean	31161.9	36395.9	42749.9	43336	45677.9	44463.3	39789.5	40225	3400.1	4220.79	413.024	419.38	734.429	783.569	4833.11	4956.99	5093.09	5454.08	7821.47	8490.6	41162.3	42439.8	6311.3	6664.76	6536.63	7282.71	6794.86	6608.24	761.096	812.323	2782.14	2951.54	12981.7	13959.6	3972.52	4895	4160.16	4109.84	1961.68	1946.97
Variance	145918460	128111170	44339010	33891045	63497615	140409910	184031380	173513810	2.16843e+06	1081523	6681.34	5147.1	34201.2	23140.6	431907	365455	2509610	1.89651e+06	7.50796e+06	5.96573e+06	36210964	23222532	1945318	1.24063e+06	2.61587e+06	1.62023e+06	1.7927e+06	2.14251e+06	23383.5	20400.1	253255	198097	11375549	8.00845e+06	1.38345e+06	641285	575987	596319	433057	383575
Skewness	0.555233	0.338652	-0.270522	0.0429669	0.503973	-0.461798	-0.306655	-0.275809	-0.114285	-0.660672	-0.0192055	0.369552	-0.0697474	0.0191085	0.0483452	0.061516	0.12389	0.319042	-0.135532	-0.277167	-0.522753	0.492032	-1.02887	-1.25957	-0.337218	-0.646042	-0.031102	-0.00860798	0.581658	0.572743	0.134552	0.10136	-0.0716375	-0.0919629	0.0115756	0.532996	0.656428	0.162567	0.222699	0.105307
Kurtosis	-0.158979	-0.488027	1.46341	1.337	-0.237252	-0.327039	-0.815681	-0.840982	-1.38232	-0.427397	0.113738	0.0671355	0.104369	-0.223183	-0.299615	-0.0640823	-0.193317	0.150089	-0.489077	0.18509	1.1561	0.173475	0.693135	2.333	-0.747875	-0.593776	-0.0804447	-0.503558	0.513212	0.276751	-0.691094	-0.138146	-0.822763	-0.514059	-0.554218	-1.02375	-0.072033	-0.150703	-0.846586	-0.816131
Perc.01%	9268	13918	21352	30039	31096	18570	9769	11283	993	1748	217	279	292	462	3349	3552	1932	2510	2083	1754	22933	33018	2130	3005	2724	4308	3815	3873	438	534	1913	1985	6303	7606	1806	3975	2786	2442	844	844
Perc.10%	17816	23122	35411	36348	36850	25503	20199	21362	1342	2608	300	335	489	579	3945	4221	2919	3726	3750	5950	33879	36445	4180	5409	4621	5668	5014	4472	599	626	2101	2371	8127	10552	2209	4050	3284	3063	1054	1054
Perc.50%	29616	35207	42671	43001	44071	43862	40910	41482	3561	4404	419	421	741	792	4840	4920	5108	5405	7765	8395	41458	42035	6628	6734	6577	7461	6872	6802	747	798	2772	2955	13113	14172	4050	4624	4074	4115	1859	1905
Perc.90%	48394	53219	50696	50696	57190	58457	56864	56864	5172	5358	518	517	952	970	5757	5788	7173	7256	11492	11613	48140	49511	7774	7797	8465	8693	8363	8353	978	1001	3497	3542	17128	17860	5488	6048	5329	5167	2884	2738
Perc.99%	59695	65536	59523	58657	65536	65536	63837	63837	5803	5966	618	618	1151	1136	6391	6391	8982	9049	13163	13327	54204	54472	8512	8512	9031	9031	9964	9865	1207	1207	3836	4093	19716	19716	6492	6492	6356	5708	3403	3403
_Area_S(1,0)	200	126	312	404	90	76	258	260	452	292	306	286	760	532	348	274	630	540	408	332	692	478	266	206	82	52	546	552	150	108	242	228	310	250	50	20	122	210	114	118
S(1,0)AngScMom	0.0077	0.00995213	0.00486933	0.00352907	0.0158025	0.015928	0.00597921	0.00579882	0.00539392	0.00562957	0.00461361	0.00484131	0.00247576	0.00282662	0.00401308	0.0047685	0.00347191	0.00368313	0.004109	0.00488097	0.0029027	0.00341381	0.00644468	0.00768216	0.0124926	0.0192308	0.00315314	0.00348535	0.00835556	0.010631	0.00618127	0.00538627	0.00489074	0.00576	0.02	0.05	0.00954045	0.0062585	0.0110803	0.0120655
S(1,0)Contrast	32.69	50.1905	69.0962	77.7871	36.1778	84	47.1473	64.6231	16.9867	31.7123	42.3791	55.979	70.0895	92.7857	71.092	83.4599	38.3873	39.0778	57.8676	66.6928	69.0549	75.0084	48.3383	52.1165	64.2683	111.692	60.3516	34.0181	43.9333	63.5926	53.0579	81.193	54.9742	66.832	130.08	225.5	87.623	79.5333	20.807	29
S(1,0)Correlat	0.852202	0.764095	0.630425	0.624244	0.829096	0.552248	0.746685	0.65646	0.920291	0.837589	0.791911	0.725916	0.644088	0.575197	0.658187	0.588224	0.810729	0.811496	0.709733	0.658623	0.642775	0.650099	0.741483	0.665955	0.683234	0.404683	0.702973	0.841812	0.80389	0.702185	0.760333	0.616309	0.721887	0.675302	0.37973	0.00474457	0.588735	0.638805	0.902899	0.854662
S(1,0)SumOfSqs	110.59	106.379	93.4805	103.507	105.842	93.8019	93.0605	94.0546	106.555	97.6298	101.829	102.12	98.4646	109.21	103.993	101.341	101.408	103.652	99.6801	97.682	96.6547	107.185	93.4917	78.0081	101.445	93.8092	101.593	107.525	112.012	106.765	110.691	105.805	98.8342	102.914	104.858	113.287	106.529	110.098	107.141	99.7674
S(1,0)InvDfMom	0.202095	0.1549	0.172583	0.124732	0.234769	0.192972	0.1385	0.135713	0.297363	0.199562	0.163002	0.125648	0.135915	0.108456	0.12736	0.126191	0.206311	0.200851	0.142317	0.135941	0.13847	0.122743	0.188469	0.198942	0.106403	0.0940335	0.166086	0.194325	0.133399	0.105644	0.180266	0.158546	0.157559	0.173596	0.0329913	0.0484981	0.142384	0.140136	0.194235	0.202634
S(1,0)SumAverg	66.97	67.9048	65.6987	65.9851	66.0889	68.9474	68.5891	68.4077	66.5	67.1233	65.9477	66.3846	66.3474	65.3797	66.2299	67.2701	66.7429	66.0704	67.3775	66.7651	66.2399	65.0921	67.5714	67.4369	69.0488	69.6154	66.8132	65.5543	66.5467	66.7037	65.8843	65.1579	67.671	67.536	69.36	71.5	67	66.3524	62.5263	61.7119
S(1,0)SumVarnc	409.669	375.324	304.826	336.242	387.192	291.208	325.095	311.595	409.232	358.807	364.938	352.502	323.769	344.055	344.878	321.905	367.245	375.532	340.853	324.035	317.564	353.732	325.628	259.916	341.51	263.544	346.02	396.08	404.114	363.468	389.706	342.028	340.363	344.825	289.35	227.65	338.492	360.857	407.758	370.07
S(1,0)SumEntrp	1.65009	1.52923	1.71022	1.76227	1.50604	1.42135	1.68124	1.66503	1.7493	1.6971	1.77828	1.71053	1.81395	1.79743	1.76457	1.71755	1.83537	1.79723	1.77846	1.71019	1.78849	1.79851	1.65588	1.6251	1.50445	1.3455	1.80248	1.80714	1.61762	1.56095	1.75648	1.72814	1.71186	1.72473	1.30161	0.879588	1.51512	1.68613	1.56037	1.56406
S(1,0)Entropy	2.16028	2.02392	2.34892	2.49756	1.84885	1.83328	2.27275	2.28469	2.35632	2.29467	2.38092	2.35687	2.66669	2.59942	2.43213	2.35973	2.53393	2.49695	2.44702	2.36829	2.603	2.5169	2.24488	2.16332	1.90647	1.716	2.55962	2.53174	2.10983	1.98883	2.25876	2.29456	2.35732	2.29075	1.69897	1.30103	2.03701	2.23475	1.98426	1.96088
S(1,0)DifVarnc	11.6219	14.9483	30.1937	27.4614	14.4	38.615	16.3405	25.3198	7.36575	12.7362	14.6275	19.7268	24.3492	30.6368	23.5295	28.028	17.081	16.9181	21.691	26.4544	28.0727	26.2424	21.6568	23.1867	19.2802	34.7929	24.3516	13.6702	14.7733	17.1509	20.9155	30.7082	21.4837	27.8944	26.8544	64.21	33.9253	28.6489	6.17975	9.72939
S(1,0)DifEntrp	1.06031	1.10965	1.1976	1.23665	1.05955	1.16286	1.12181	1.19385	0.954291	1.03966	1.12785	1.16644	1.22638	1.27581	1.2352	1.23718	1.08442	1.10207	1.18321	1.20751	1.21634	1.24305	1.11019	1.13483	1.1669	1.11088	1.19641	1.07592	1.07827	1.14163	1.17034	1.24763	1.16245	1.18172	1.1871	0.879588	1.17144	1.22803	0.946191	1.03263
_Area_S(0,1)	198	126	310	406	102	76	276	270	430	274	296	284	772	540	350	282	616	526	408	336	704	482	262	208	86	52	546	564	138	104	232	222	312	254	52	20	108	200	110	112
S(0,1)AngScMom	0.00765228	0.0103301	0.00470343	0.00388265	0.0119185	0.0152355	0.00551355	0.00567901	0.00495403	0.00522138	0.00454255	0.0044634	0.00265443	0.00324417	0.00409796	0.00540717	0.00315188	0.00354928	0.00380863	0.00449972	0.00295794	0.00331434	0.00550667	0.00670303	0.0127096	0.0192308	0.00334769	0.00335119	0.00808654	0.0112796	0.00553656	0.00592484	0.00456114	0.00564201	0.0221893	0.06	0.0133745	0.00695	0.0107438	0.0111607
S(0,1)Contrast	31.8384	45.2381	67.329	79.9704	72.7451	46.6579	31.558	35.3852	33.0233	58.4818	49.4527	67.9507	42.9301	55.3111	43.1314	52.1064	48.0649	50.2205	67.9706	98.0833	57.0227	83.1867	58.4733	73.9231	55.0465	67.5769	41.4908	27.9574	63.3913	66.5192	35.6207	54.8108	50.4038	65.9685	37.0385	124.2	70.4259	106.76	83.1636	83.3214
S(0,1)Correlat	0.850932	0.787051	0.647571	0.603792	0.668439	0.764642	0.839506	0.818126	0.839837	0.682091	0.76009	0.65717	0.777507	0.743105	0.796098	0.754351	0.754299	0.742269	0.654179	0.478488	0.709147	0.606747	0.669563	0.569084	0.73077	0.576915	0.799314	0.867837	0.72403	0.703415	0.835778	0.73823	0.737661	0.666211	0.835481	0.446721	0.669837	0.495869	0.566481	0.589042
S(0,1)SumOfSqs	106.791	106.218	95.5213	100.92	109.701	99.121	98.3152	97.2796	103.093	91.9787	103.065	99.1026	96.475	107.653	105.765	106.059	97.812	97.4283	98.2742	94.0374	98.0266	105.767	88.4787	85.7743	102.229	79.8621	103.373	105.769	114.852	112.142	108.453	104.693	96.0661	98.8176	112.566	112.24	106.653	105.885	95.917	101.375
S(0,1)InvDfMom	0.185711	0.143193	0.168171	0.167349	0.0917666	0.114166	0.19952	0.210842	0.203995	0.136098	0.171431	0.146087	0.163137	0.153794	0.157618	0.174871	0.156956	0.163171	0.165429	0.155736	0.185428	0.142964	0.145409	0.153726	0.0922753	0.0627791	0.19399	0.225811	0.11401	0.157578	0.187183	0.144908	0.146663	0.146578	0.103125	0.0155017	0.181849	0.113371	0.116725	0.101233
S(0,1)SumAverg	67.3131	67.873	66.4	66.1576	65.6863	68.5526	67.3406	67.6667	67.693	68.292	66.277	66.162	66.3549	65.8	66.0457	66.5887	67.4545	67.0418	67.2451	67.2024	66.0852	65.4523	67.8015	66.6346	68.5814	70.8846	66.5897	65.6028	67.4493	65.9038	65.6552	66.5405	67.7628	67.6378	67.3462	69.2	67.1296	67.14	60.6909	60.9643
S(0,1)SumVarnc	395.326	379.635	314.756	323.709	366.058	349.826	361.703	353.733	379.348	309.433	362.808	328.46	342.97	375.301	379.929	372.129	343.183	339.493	325.126	278.066	335.084	339.883	295.442	269.174	353.871	251.871	372	395.119	396.016	382.048	398.191	363.96	333.86	329.302	413.226	324.76	356.187	316.78	300.504	322.177
S(0,1)SumEntrp	1.6598	1.58783	1.71161	1.76943	1.50978	1.43121	1.70296	1.72781	1.73743	1.65765	1.72509	1.73035	1.81659	1.80371	1.78603	1.71076	1.79915	1.78864	1.75638	1.72374	1.77621	1.7884	1.65106	1.59759	1.45488	1.32235	1.81516	1.8247	1.59294	1.53359	1.70111	1.70927	1.77197	1.74387	1.29919	0.879588	1.45857	1.64959	1.53093	1.52099
S(0,1)Entropy	2.16741	2.01553	2.37143	2.45909	1.94367	1.83328	2.32418	2.31204	2.38788	2.32842	2.37516	2.37964	2.639	2.54491	2.4219	2.31409	2.57656	2.51816	2.46563	2.39861	2.60671	2.53466	2.30627	2.20878	1.9065	1.716	2.54282	2.53722	2.10498	1.96493	2.28308	2.26228	2.38413	2.29164	1.66969	1.24082	1.90657	2.19862	1.98666	1.97396
S(0,1)DifVarnc	11.3605	15.423	28.004	35.4822	19.5409	10.3414	12.083	14.4969	10.9551	18.5246	19.277	26.2482	14.7521	20.1945	15.4939	19.8343	18.8769	18.4675	30.1843	47.2329	24.0908	35.6282	22.2898	30.4138	16.4911	18.037	16.3441	11.0951	20.8582	23.5159	12.3151	18.1592	17.0458	23.6673	10.8713	16.04	29.1334	43.7164	19.7441	21.5867
S(0,1)DifEntrp	1.0285	1.09398	1.17866	1.24656	1.17493	1.04	1.06768	1.07654	1.07619	1.18527	1.1461	1.21524	1.14159	1.1813	1.1194	1.16317	1.14039	1.15885	1.21668	1.25366	1.19891	1.24969	1.17152	1.22293	1.0689	1.03151	1.13164	1.05385	1.14672	1.15273	1.07681	1.14894	1.15394	1.21016	0.95637	0.736452	1.17157	1.26921	1.11501	1.1432
_Area_S(1,1)	186	118	300	396	86	72	252	250	426	268	294	278	748	520	338	270	600	512	400	330	678	466	248	194	80	50	532	542	140	100	226	214	300	246	42	16	110	194	102	108
S(1,1)AngScMom	0.00653255	0.0100546	0.00457778	0.00373686	0.0135208	0.0165895	0.00554296	0.005504	0.00426503	0.00540209	0.00478967	0.00525335	0.00242	0.00281065	0.00427156	0.00515775	0.00303889	0.00307465	0.0039625	0.00422406	0.00273666	0.00305771	0.00598335	0.00749283	0.0153125	0.02	0.00286195	0.00329516	0.00826531	0.0114	0.00524708	0.00559001	0.00471111	0.00555225	0.0249433	0.0625	0.0102479	0.00664258	0.0101884	0.0104595
S(1,1)Contrast	48.7527	65.8644	103.193	148.051	48.4419	110.917	83.2222	100.84	49.385	82.5746	73.9728	98.2518	97.3824	129.615	102.018	121.533	77.51	75.1133	62.76	71.2788	106.885	112.803	114.21	138.247	72.525	45.68	95.0226	49.2214	85.8429	82.58	95.4248	140.056	79.26	92.3577	189.81	326.125	105.836	138.412	77.1569	79.1296
S(1,1)Correlat	0.783067	0.704168	0.478326	0.263409	0.760548	0.396675	0.554868	0.455854	0.756293	0.54046	0.647983	0.515005	0.498001	0.398315	0.514096	0.415081	0.58943	0.610748	0.679029	0.65604	0.420781	0.463681	0.331772	0.131756	0.629761	0.78753	0.523668	0.767583	0.614387	0.652353	0.554192	0.34494	0.588787	0.546353	0.138969	-0.273032	0.503993	0.342256	0.611579	0.639372
S(1,1)SumOfSqs	112.368	111.321	98.906	100.497	101.152	91.9211	93.4805	92.659	101.32	89.8449	105.07	101.292	96.9946	107.71	104.977	103.889	94.3933	96.4841	97.7658	103.615	92.2664	105.164	85.4571	79.6132	97.9436	107.498	99.744	105.89	111.307	118.77	107.025	106.903	96.3735	101.795	110.222	128.09	106.688	105.217	99.3211	109.711
S(1,1)InvDfMom	0.137289	0.116306	0.10072	0.0955544	0.121507	0.150001	0.130809	0.12453	0.139665	0.107475	0.12545	0.118976	0.120572	0.114612	0.101448	0.098962	0.109235	0.109861	0.155169	0.13075	0.105484	0.104293	0.141904	0.131141	0.1775	0.143509	0.12107	0.165391	0.142283	0.1831	0.101401	0.0974771	0.182533	0.170299	0.0716207	0.0364849	0.0875143	0.0825872	0.0834344	0.104283
S(1,1)SumAverg	67.6559	68.2712	65.7933	66.596	66.3023	69.8056	69.1746	69.352	68.0704	68.7388	66.3946	66.3381	66.7567	65.5308	67.0473	67.1481	68.1833	67.1289	67.63	66.3818	66.649	65.1373	68.4516	67.4433	69.475	67.36	67.2632	65.3321	67.4143	66.02	66.3628	66.2243	68.4467	67.6748	70.6667	71.375	66.3455	66.6392	60.098	61.0926
S(1,1)SumVarnc	400.72	379.418	292.431	253.938	356.164	256.768	290.7	269.796	355.896	276.805	346.307	306.914	290.596	301.226	317.891	294.022	300.063	310.823	328.303	343.181	262.181	307.852	227.619	180.206	319.249	384.31	303.953	374.34	359.386	392.5	332.674	287.557	306.234	314.821	251.079	186.234	320.917	282.457	320.128	359.714
S(1,1)SumEntrp	1.68754	1.59603	1.69419	1.7271	1.38488	1.38275	1.70248	1.68984	1.75658	1.65875	1.74005	1.69192	1.78555	1.78057	1.69551	1.67029	1.76322	1.77102	1.75042	1.71026	1.76304	1.75045	1.61421	1.56529	1.4044	1.29252	1.7682	1.80029	1.62315	1.53789	1.70193	1.68686	1.73321	1.6897	1.20754	0.827832	1.54188	1.64536	1.54074	1.60554
S(1,1)Entropy	2.20478	2.01576	2.37723	2.46313	1.88549	1.7988	2.29384	2.29856	2.4319	2.31352	2.35722	2.32816	2.67403	2.59817	2.41623	2.32706	2.57303	2.55888	2.44436	2.40812	2.62307	2.55454	2.26757	2.16753	1.83536	1.69897	2.58582	2.54721	2.10418	1.95786	2.29816	2.27484	2.36019	2.2857	1.60891	1.20412	2.00308	2.20477	1.9968	1.9944
S(1,1)DifVarnc	17.0061	21.7208	39.9378	55.7741	13.2742	51.7122	30.1406	38.4932	17.0607	28.9791	26.7656	35.7395	34.9555	44.6921	33.2946	38.9254	27.9953	26.168	23.1959	26.9151	41.6519	37.5674	54.0221	66.7839	29.9494	16.9504	38.0371	18.6254	33.3839	32.17	32.1308	48.1113	34.5485	39.7657	45.8095	104.859	35.5815	50.0136	20.7597	22.8796
S(1,1)DifEntrp	1.11762	1.15602	1.27346	1.36286	1.09631	1.12663	1.22865	1.29579	1.15302	1.24479	1.2167	1.27728	1.30168	1.34349	1.29619	1.31066	1.23526	1.24199	1.20968	1.21704	1.31092	1.32501	1.26631	1.29897	1.11461	0.935985	1.27021	1.15977	1.23317	1.1977	1.24976	1.33812	1.24311	1.27123	1.20754	0.90309	1.23929	1.31307	1.17278	1.16916
_Area_S(1,-1)	184	120	298	390	86	68	258	258	420	266	280	270	746	524	332	264	606	518	386	312	686	472	258	200	76	48	528	540	132	96	222	220	294	240	50	16	100	196	102	104
S(1,-1)AngScMom	0.00714792	0.0108333	0.0048196	0.00340565	0.01298	0.016436	0.00543838	0.00531819	0.00443311	0.0057663	0.00512755	0.00455418	0.00244737	0.00280432	0.00439106	0.00496442	0.00297901	0.00328707	0.00393299	0.00503369	0.00269021	0.00298944	0.00597921	0.0069	0.0145429	0.0234375	0.00322113	0.00318244	0.0104454	0.0117188	0.00584368	0.00549587	0.00465084	0.00552083	0.0248	0.0703125	0.012	0.00650771	0.0117263	0.0127589
S(1,-1)Contrast	73.1848	109.35	119.617	114.559	119.395	119.029	54.8682	77.5581	42.6952	81.797	80.0214	111.548	89.3137	111.809	96.2651	112.97	69.3993	68.1622	138.477	183.397	94.0875	140.928	61.6279	60.88	124.026	217	67.2765	50.6333	106.409	137	67.0811	111.418	103.32	121.767	114.32	270.375	137.1	173.898	119.118	137.192
S(1,-1)Correlat	0.659728	0.461521	0.340497	0.43717	0.471226	0.436558	0.725669	0.595424	0.792912	0.537488	0.58888	0.457464	0.547196	0.490652	0.550331	0.448312	0.64907	0.649318	0.278392	0.0424442	0.532952	0.345169	0.683643	0.666789	0.392715	-0.159932	0.677448	0.755652	0.564322	0.370587	0.69385	0.480394	0.448859	0.412332	0.429687	-0.122798	0.359472	0.194664	0.407247	0.307523
S(1,-1)SumOfSqs	107.539	101.536	90.6876	101.77	112.898	105.627	100.004	95.8512	103.085	88.4268	97.3213	102.803	98.6228	109.757	107.04	102.385	98.8793	97.1852	95.9501	95.7633	100.726	107.606	97.4023	91.3536	102.115	93.5399	104.288	103.609	122.119	108.832	109.556	107.214	93.7326	103.602	100.226	120.402	107.021	107.966	100.478	99.0592
S(1,-1)InvDfMom	0.158964	0.129207	0.100707	0.0965821	0.0998772	0.0991568	0.113173	0.107296	0.180172	0.149761	0.139948	0.115265	0.106603	0.0950948	0.111725	0.104921	0.174762	0.156795	0.136519	0.128681	0.141095	0.10912	0.13088	0.129495	0.10827	0.0765791	0.147908	0.16169	0.12968	0.108097	0.167745	0.133454	0.114465	0.0978315	0.11846	0.130881	0.151211	0.12662	0.085874	0.0762734
S(1,-1)SumAverg	68.75	69.35	65.9664	66.4359	66.186	69.1471	67.7209	68.1473	67.9333	68.8797	66.1214	65.9333	66.5737	65.4962	66.1807	67.6061	67.4917	66.834	67.886	67.1538	65.965	65.1229	67.6434	66.84	69.3421	70.4167	66.7235	66.0333	67.5303	66.5833	66.2883	66.1273	68.8299	67.6	68.24	71.625	67.66	67.1837	60.2941	59.3846
S(1,-1)SumVarnc	356.97	296.794	243.133	292.523	332.198	303.478	345.147	305.847	369.643	271.91	309.264	299.662	305.178	327.219	331.895	296.572	326.118	320.579	245.324	199.656	308.815	289.498	327.981	304.534	284.436	157.16	349.874	363.803	382.067	298.326	371.142	317.438	271.611	292.64	286.582	211.234	290.984	257.966	282.796	259.044
S(1,-1)SumEntrp	1.63526	1.536	1.69097	1.74406	1.44617	1.40753	1.65398	1.69149	1.72229	1.6344	1.667	1.65884	1.77894	1.79124	1.76337	1.72012	1.78282	1.76486	1.71703	1.63473	1.74878	1.73294	1.63829	1.62778	1.45303	1.17006	1.80089	1.79782	1.53211	1.5338	1.73462	1.70742	1.67443	1.69314	1.34978	0.90309	1.48813	1.64985	1.53339	1.49886
S(1,-1)Entropy	2.17647	1.99512	2.35448	2.49611	1.89949	1.79709	2.29899	2.31123	2.42286	2.29185	2.32297	2.36224	2.6776	2.60026	2.41119	2.33378	2.58643	2.54505	2.45904	2.34163	2.63388	2.55657	2.27099	2.19039	1.84913	1.64361	2.5543	2.55356	2.01223	1.94464	2.26771	2.27948	2.36796	2.29175	1.62672	1.16649	1.95184	2.21697	1.95692	1.94178
S(1,-1)DifVarnc	27.9153	38.5097	38.8589	34.6629	41.2991	46.7794	19.7924	29.2071	15.0577	28.2762	31.7189	45.5175	30.2753	36.6098	34.7466	44.5317	33.0022	27.6752	63.4254	95.3264	35.741	52.2011	21.6149	20.6844	38.7071	73	27.5006	20.3018	42.1664	52.9722	25.0066	41.4678	42.3311	50.6456	36.88	70.8594	56.4596	71.434	31.6401	37.1923
S(1,-1)DifEntrp	1.20258	1.17962	1.3046	1.30544	1.25173	1.17498	1.12294	1.21486	1.12977	1.23608	1.23689	1.29529	1.27811	1.31814	1.28541	1.3067	1.18105	1.20765	1.33641	1.33794	1.29387	1.35694	1.20308	1.15276	1.19455	1.14497	1.21955	1.15495	1.2554	1.2703	1.1837	1.30552	1.25768	1.28634	1.06669	0.648912	1.24216	1.34934	1.2537	1.25717
_Area_S(2,0)	174	106	284	368	68	60	222	226	426	268	280	258	704	488	314	240	594	506	374	298	640	436	240	182	64	38	506	504	134	92	220	204	280	220	34	12	108	188	96	102
S(2,0)AngScMom	0.00746466	0.011392	0.00476096	0.0036478	0.0181661	0.0172222	0.00624949	0.00646096	0.0044083	0.00568055	0.00441327	0.00450694	0.00240509	0.00297299	0.00470607	0.00586806	0.00318562	0.00372604	0.00413223	0.00454934	0.00275879	0.00336672	0.00628472	0.00778891	0.0166016	0.0263158	0.00297614	0.00316515	0.00846514	0.0118147	0.00623967	0.00619954	0.00451531	0.0057438	0.0294118	0.0833333	0.010631	0.00662064	0.0110677	0.011534
S(2,0)Contrast	101.345	161.075	160.162	172.283	76.9412	234.9	106.018	153.77	48.8498	72.4328	112.036	142.953	147.869	181.422	160.204	182.258	98.1919	93.2767	154.07	184.523	141.722	154.945	119.142	118.286	157.5	292.947	155.055	79.9881	138.746	176.391	105.182	165.294	140.221	167.909	334.824	357.333	213.204	175.33	53.0625	84.8039
S(2,0)Correlat	0.564771	0.278457	0.112591	0.178472	0.646593	-0.154379	0.405418	0.190945	0.765186	0.585308	0.41331	0.287045	0.231348	0.133783	0.208413	0.123708	0.513054	0.530181	0.213768	0.0158006	0.245493	0.270971	0.327548	0.232382	0.121492	-0.396092	0.241868	0.613183	0.390556	0.194539	0.530971	0.200031	0.300391	0.17572	-0.308789	-0.634562	-0.0117571	0.194739	0.751267	0.525846
S(2,0)SumOfSqs	116.427	111.619	90.2414	104.855	108.856	101.743	89.1534	95.0306	104.018	87.3332	95.4811	100.254	96.1875	104.721	101.192	103.994	100.824	99.2688	97.9797	93.7429	93.9169	106.268	88.5875	77.0472	89.6406	104.917	102.261	103.393	113.83	109.497	112.127	103.313	100.214	101.852	127.913	109.306	105.363	108.865	106.666	89.4265
S(2,0)InvDfMom	0.154066	0.0573135	0.0926301	0.0766548	0.184503	0.139423	0.113276	0.0983795	0.16137	0.148109	0.0950009	0.0857291	0.0997753	0.0871284	0.102861	0.114067	0.170685	0.157858	0.126523	0.121291	0.122583	0.114695	0.103509	0.105889	0.0331369	0.0322611	0.113422	0.150299	0.0811774	0.0940628	0.168774	0.0778595	0.105413	0.104941	0.0115285	0.00314412	0.105751	0.12297	0.140693	0.105416
S(2,0)SumAverg	68.5402	70.3585	65.6549	66.7174	65.5294	70.8333	69.6216	69.646	67.6197	68.5821	66.6357	67.3721	66.9886	65.1844	67.2357	68.375	67.4848	66.4071	68.0802	67.2617	66.6031	65.0367	68.6583	67.8242	70.75	70.7368	67.419	65.4722	68.1493	67.4783	66.3818	65.9412	68.5214	68.3455	69.4118	68.3333	67.537	66.2234	60.9375	59
S(2,0)SumVarnc	364.363	285.4	200.803	247.138	358.484	172.072	250.596	226.353	367.222	276.9	269.889	258.063	236.881	237.462	244.562	233.718	305.105	303.799	237.849	190.448	233.946	270.127	235.208	189.903	201.062	126.72	253.99	333.583	316.575	261.597	343.327	247.957	260.635	239.499	176.83	79.8889	208.249	260.131	373.6	272.902
S(2,0)SumEntrp	1.66688	1.54252	1.64934	1.68642	1.38313	1.38927	1.63538	1.61845	1.71239	1.66898	1.68776	1.68519	1.73106	1.71081	1.68004	1.6289	1.7844	1.77451	1.69106	1.62017	1.72147	1.71007	1.60958	1.58841	1.36635	1.24707	1.74608	1.77405	1.58622	1.44347	1.67492	1.61557	1.66893	1.61644	1.11084	0.778151	1.4564	1.63636	1.5338	1.51654
S(2,0)Entropy	2.15751	1.9699	2.36511	2.47093	1.77939	1.76812	2.24192	2.23418	2.42039	2.30233	2.38156	2.36552	2.68182	2.57734	2.3804	2.28171	2.5638	2.5133	2.434	2.37369	2.61986	2.51656	2.24782	2.14672	1.78737	1.57978	2.5749	2.5438	2.08667	1.93761	2.24251	2.2373	2.37295	2.26647	1.53148	1.07918	1.98883	2.20691	1.96346	1.95548
S(2,0)DifVarnc	36.7919	42.5532	66.9443	64.0774	31.1799	111.69	36.1224	60.7243	19.8518	28.121	40.8744	55.6976	52.1409	61.4119	56.0858	67.5899	44.4635	37.5295	60.0729	76.0282	59.3095	60.3738	55.0083	57.4114	41.9375	96.9474	65.5922	32.8043	43.4654	50.5614	48.522	61.3341	55.4499	70.079	71.2388	8.88889	79.2445	70.3763	17.8086	27.2226
S(2,0)DifEntrp	1.25222	1.27896	1.35129	1.38308	1.15059	1.24021	1.27131	1.3382	1.1443	1.21107	1.27584	1.33655	1.38239	1.40566	1.37285	1.40229	1.30201	1.29439	1.38726	1.39998	1.36022	1.37508	1.27031	1.20691	1.09491	1.12032	1.37958	1.25122	1.28596	1.35826	1.273	1.32572	1.34702	1.35253	1.1242	0.677808	1.35402	1.37001	1.11349	1.16661
_Area_S(0,2)	170	106	278	372	90	60	254	246	380	232	260	252	730	504	318	256	564	480	374	306	664	444	232	184	70	40	506	528	112	84	204	192	284	228	40	12	82	170	88	88
S(0,2)AngScMom	0.00775087	0.011748	0.00491693	0.00390219	0.0150617	0.0177778	0.00533201	0.00515566	0.0048892	0.0063912	0.00526627	0.00503905	0.00237193	0.00278723	0.00419287	0.00537109	0.00269101	0.00296875	0.00397495	0.00418642	0.00266276	0.0035407	0.00624257	0.00750236	0.0146939	0.025	0.00310894	0.00304178	0.00972577	0.0141723	0.00586313	0.00580512	0.00473616	0.00538627	0.03	0.0972222	0.0133849	0.00636678	0.0123967	0.0129132
S(0,2)Contrast	111.059	148.132	154.597	184.124	200.622	162.633	98.937	110.098	108.995	151.871	108.215	173.706	112.841	144.202	106.547	127.359	126.589	132.267	164.963	220.072	134.837	203.194	157.905	191.783	176.257	189.05	108.229	74.4848	158.446	167.5	90.2451	157.219	144.479	180.439	106.65	279.833	163.439	176.376	278.886	262.159
S(0,2)Correlat	0.498632	0.337072	0.140605	0.108391	0.133807	0.115747	0.473263	0.414123	0.46079	0.0997399	0.413	0.124003	0.398443	0.33037	0.502704	0.388819	0.336791	0.300744	0.131068	-0.166209	0.269639	0.048196	0.0107288	-0.152726	0.141459	-0.123033	0.457418	0.626742	0.339409	0.30136	0.590918	0.235045	0.25502	0.121096	0.474472	-0.0853849	0.225166	0.162778	-0.29892	-0.171911
S(0,2)SumOfSqs	110.756	111.726	89.9453	103.254	115.807	91.9608	93.915	93.9597	101.069	84.3482	92.1767	99.1478	93.7909	107.673	107.127	104.191	95.4365	94.5767	94.9226	94.3535	92.3088	106.741	79.8088	83.1866	102.649	84.1694	99.7353	99.7765	119.928	119.876	110.302	102.763	96.9683	102.65	101.469	128.91	105.467	105.334	107.353	111.851
S(0,2)InvDfMom	0.132424	0.106059	0.106459	0.125763	0.0787219	0.0190384	0.114403	0.102922	0.113623	0.0528474	0.104283	0.0871595	0.0856614	0.0852573	0.0941263	0.0922341	0.0962758	0.104379	0.133884	0.118462	0.101837	0.0917605	0.0815361	0.0789941	0.0610538	0.0411098	0.0908181	0.107457	0.0783384	0.123744	0.0883976	0.0579875	0.0752938	0.0828477	0.141856	0.199961	0.0799364	0.10068	0.0372328	0.0435992
S(0,2)SumAverg	68.9882	69.9434	66.8993	66.6613	64.7111	71.3	68.7795	69.4309	69.6053	69.4397	66.0308	66.5	67.1315	66.3532	66.6981	67.7812	68.8156	67.9	67.6578	67.0654	66.5542	65.5991	68.9224	66.7174	70.9429	72.15	67.2253	65.8258	68.9464	66.5952	65.8333	68.0938	69.0141	68.4561	68.65	65.8333	66.9024	66.1647	58.7955	59.5682
S(0,2)SumVarnc	331.965	298.77	205.184	228.891	262.605	205.21	276.723	265.741	295.281	185.522	260.491	222.885	262.322	286.49	321.959	289.405	255.157	246.04	214.728	157.342	234.398	223.772	161.33	140.964	234.34	147.627	290.712	324.621	321.265	312.003	350.962	253.835	243.394	230.16	299.228	235.806	258.43	244.961	150.526	185.245
S(0,2)SumEntrp	1.57245	1.49129	1.65683	1.69465	1.42072	1.32907	1.67949	1.6663	1.68114	1.56158	1.63115	1.62506	1.76912	1.75164	1.722	1.66241	1.73937	1.72308	1.67542	1.64061	1.71135	1.69816	1.53949	1.51833	1.44086	1.24082	1.74609	1.77303	1.43762	1.42608	1.70163	1.59178	1.69682	1.66568	1.22946	0.577465	1.48977	1.61865	1.33476	1.39534
S(0,2)Entropy	2.14191	1.95854	2.34168	2.45279	1.86059	1.75808	2.3106	2.31322	2.37502	2.24024	2.31885	2.32909	2.67729	2.58685	2.41059	2.31239	2.61621	2.56613	2.44606	2.4075	2.63705	2.51113	2.24347	2.15844	1.8365	1.60206	2.55627	2.56807	2.02234	1.86694	2.2506	2.24881	2.35208	2.29456	1.54185	1.02901	1.88445	2.20566	1.91712	1.91195
S(0,2)DifVarnc	44.0116	52.9776	65.641	79.8861	53.4044	28.8456	35.8159	42.6708	35.1252	45.7452	42.4807	71.9527	36.6975	50.3739	36.0506	44.6631	45.3331	44.6883	70.6546	103.629	50.7728	80.902	63.8486	75.0487	48.8898	46.2475	38.0141	25.4848	49.3186	63.1684	28.884	47.624	46.1619	59.8243	40.2275	147.583	56.997	68.2165	66.6544	66.7949
S(0,2)DifEntrp	1.26917	1.27546	1.34469	1.38882	1.25268	1.1333	1.27317	1.2932	1.28848	1.31428	1.27399	1.36185	1.32768	1.38061	1.30522	1.33381	1.32346	1.36172	1.3815	1.37958	1.37383	1.42869	1.32169	1.34091	1.21832	1.01874	1.31603	1.23518	1.30049	1.30247	1.26402	1.33283	1.35652	1.40943	1.07895	0.778151	1.2767	1.35243	1.33028	1.31325
_Area_S(2,2)	148	90	260	352	60	54	210	206	372	222	256	242	680	464	296	234	534	452	358	294	614	412	208	158	60	34	480	484	114	76	190	174	262	212	20	6	86	158	78	82
S(2,2)AngScMom	0.00821768	0.011358	0.00497041	0.00397082	0.02	0.0185185	0.0060771	0.0066453	0.00374321	0.00616833	0.00509644	0.00515675	0.00231401	0.0027497	0.00431428	0.00569801	0.00280548	0.00298575	0.00390125	0.0049285	0.0026048	0.00334622	0.00661058	0.00785131	0.0177778	0.0294118	0.0028559	0.0031504	0.00923361	0.0135042	0.00603878	0.00693619	0.00489482	0.00556248	0.05	0.166667	0.0121687	0.00849223	0.0141354	0.0151695
S(2,2)Contrast	144.486	172.844	189.9	226.716	131.867	230.37	193.524	232.524	141.914	182.045	130.078	172.099	169.053	214.888	177.236	212.137	162.873	164.469	153.525	168.748	144.143	168.607	194.154	226.709	150.933	92.4706	185.363	95.9132	198.035	160.579	196.811	275.736	166.069	182.151	324.4	305.667	194.558	187.532	238.308	238.098
S(2,2)Correlat	0.398887	0.272719	0.00500627	-0.0904898	0.412161	-0.126948	-0.00924192	-0.150794	0.296067	-0.00355723	0.348008	0.135419	0.119578	0.0160098	0.149056	0.0356031	0.131608	0.126873	0.179232	0.172639	0.220178	0.208656	-0.11134	-0.299533	0.171202	0.563519	0.0735831	0.526907	0.162302	0.330024	0.121683	-0.279937	0.182274	0.167855	-0.432989	-0.781159	-0.0514228	0.0648998	-0.14461	-0.0177645
S(2,2)SumOfSqs	120.182	118.829	95.4277	103.951	112.162	102.21	95.8758	101.028	100.801	90.6999	99.7543	99.5276	96.0068	109.192	104.141	109.984	93.7783	94.1839	93.5253	101.98	92.4207	106.532	87.3512	87.227	91.0556	105.927	100.043	101.368	118.202	119.839	112.038	107.715	101.543	109.447	113.19	85.8056	92.5214	100.274	104.1	116.971
S(2,2)InvDfMom	0.0912491	0.0695186	0.107975	0.0995396	0.0392429	0.0567829	0.0929558	0.0971101	0.105743	0.112439	0.088394	0.0896232	0.0942606	0.0865797	0.094168	0.0971609	0.086162	0.0877012	0.0978668	0.0837309	0.09769	0.0893861	0.0832857	0.0714134	0.124419	0.114667	0.100975	0.141918	0.0754217	0.092662	0.065519	0.0540856	0.115991	0.105093	0.0147913	0.00678278	0.0685513	0.148635	0.0314644	0.0780976
S(2,2)SumAverg	69	69.5111	65.6538	66.5341	66.1333	69.7778	69.9619	70.3495	69.9677	69.5045	66.6719	66.4132	67.1412	65.0862	67.8716	67.8291	69.2097	67.6372	68.6425	66.4354	66.5212	65.7621	67.8654	66.5063	70.6667	66.2353	67.4958	65.2686	68.5614	67.8947	66.5368	67.3448	68.8626	67.3962	67.8	57.6667	65.7674	64.6709	58.5641	59.6585
S(2,2)SumVarnc	336.243	302.472	191.811	189.09	316.782	178.469	189.98	171.587	261.289	180.754	268.939	226.011	214.974	221.881	239.328	227.8	212.241	212.267	220.576	239.171	225.539	257.521	155.251	122.199	213.289	331.239	214.808	309.56	274.773	318.778	251.343	155.122	240.103	255.635	128.36	37.5556	175.527	213.563	178.092	229.786
S(2,2)SumEntrp	1.58938	1.48256	1.62524	1.65836	1.41692	1.38677	1.57852	1.57889	1.69269	1.51309	1.64457	1.62749	1.72692	1.67935	1.70193	1.59675	1.71105	1.70918	1.66039	1.64204	1.7114	1.7217	1.5199	1.48417	1.32149	1.19503	1.7028	1.76641	1.53665	1.51641	1.59018	1.51961	1.651	1.62768	1	0.477121	1.44617	1.55741	1.42504	1.43103
S(2,2)Entropy	2.11024	1.94755	2.33449	2.43921	1.71795	1.73239	2.25985	2.22398	2.46492	2.24192	2.32238	2.31228	2.68209	2.58769	2.39857	2.27916	2.59814	2.55489	2.44076	2.34084	2.62828	2.5104	2.22178	2.12626	1.75808	1.53148	2.5768	2.54921	2.04106	1.87289	2.23834	2.18258	2.33614	2.27238	1.30103	0.778151	1.9205	2.10814	1.86122	1.84039
S(2,2)DifVarnc	55.0051	58.1165	78.3539	89.7195	30.5289	89.904	67.229	87.1228	50.5368	72.2675	41.6006	58.7911	58.5557	72.1266	57.8661	71.8054	58.4044	59.6332	51.8421	56.7054	56.5045	59.7794	78.1775	89.3149	46.8933	28.4706	75.3748	36.3939	82.7553	65.7729	65.4065	93.9509	67.438	69.3104	81.04	38.8889	63.642	76.3493	52.2301	63.3421
S(2,2)DifEntrp	1.31537	1.24502	1.36249	1.42872	1.10957	1.25844	1.38389	1.41283	1.35998	1.35396	1.33522	1.3905	1.415	1.44995	1.4057	1.41019	1.39696	1.39431	1.38783	1.38522	1.36555	1.40727	1.37129	1.34953	1.20865	0.991223	1.40323	1.29533	1.3208	1.26391	1.38328	1.40457	1.38301	1.40416	0.939794	0.477121	1.28158	1.33441	1.30736	1.30607
_Area_S(2,-2)	150	94	254	342	64	44	218	222	362	220	232	226	680	472	286	220	550	464	328	260	628	424	224	168	52	32	474	484	98	70	184	186	252	200	36	6	66	160	72	76
S(2,-2)AngScMom	0.0072	0.0115437	0.00489801	0.00405253	0.0166016	0.0247934	0.00643885	0.00572194	0.00421233	0.00644628	0.0052393	0.0050513	0.00240484	0.00307922	0.0045968	0.00541322	0.00321322	0.00331636	0.00423855	0.00538462	0.00261167	0.00309274	0.00589923	0.00786565	0.0207101	0.03125	0.00333814	0.00332115	0.0118701	0.015102	0.00708885	0.00589664	0.00488158	0.0064	0.029321	0.166667	0.0183655	0.00695313	0.0150463	0.0169668
S(2,-2)Contrast	218.613	299.234	187.307	188.146	188.75	246.136	95.6606	150.198	115.818	178.945	125.836	177.442	144.935	156.097	175.797	221.127	126.2	137.095	206.518	181.9	173.172	249.868	112.634	104.262	266.808	322.75	113.101	87.3388	254.98	286.086	130.457	239.043	196.913	211.53	272.111	158	208.121	235.825	327.694	336.658
S(2,-2)Correlat	0.0710046	-0.257774	-0.0718037	0.0831772	-0.00034159	-0.132398	0.468697	0.189829	0.412148	-0.00446369	0.284302	0.0908424	0.262523	0.262705	0.171481	0.00709599	0.332403	0.239664	-0.119082	-0.00769826	0.121742	-0.191383	0.415956	0.367195	-0.248824	-0.446701	0.429095	0.558968	0.0536282	-0.254122	0.444054	-0.0405621	-0.0486245	-0.0740532	-0.341836	-0.729927	-0.00645677	-0.136294	-0.384085	-0.423219
S(2,-2)SumOfSqs	117.661	118.954	87.3794	102.608	94.3428	108.679	90.0245	92.6954	98.5093	89.0751	87.9115	97.5862	98.2643	105.858	106.091	111.354	94.5182	90.1541	92.2713	90.2552	98.5883	104.865	96.4258	82.3808	106.824	111.547	99.0544	99.0164	134.714	114.058	117.328	114.862	93.891	98.4728	101.395	45.6667	103.393	103.769	118.379	118.273
S(2,-2)InvDfMom	0.0652685	0.0668352	0.0783449	0.0714082	0.0184708	0.0169632	0.0972184	0.0962589	0.138257	0.111684	0.0808079	0.0830772	0.109582	0.100654	0.0979962	0.10411	0.113791	0.0985904	0.100447	0.111068	0.0907027	0.0933406	0.108238	0.109192	0.0620043	0.0310673	0.0996651	0.12586	0.114972	0.0987969	0.126248	0.0705339	0.0882926	0.0853117	0.0847685	0.00992447	0.0863513	0.0625293	0.0674522	0.103468
S(2,-2)SumAverg	71.0933	71.4043	64.8661	67.4795	63.0625	68.6818	68.1743	68.5946	69.7735	69.8364	65.0948	64.9823	66.8412	65.7754	66.8601	68.0545	68.0109	67.3534	67.4817	64.9	66.1274	64.2642	67.8304	67.3095	67.8846	65.75	66.8481	65.9752	68.8571	67.2857	66.5435	66.957	68.8016	66.67	66.4444	60	65.3939	65.15	59.6944	59.6579
S(2,-2)SumVarnc	252.031	176.581	162.21	222.285	188.621	188.581	264.438	220.583	278.219	177.355	225.81	212.902	248.122	267.335	248.568	224.288	251.873	223.522	162.567	179.121	221.181	169.591	273.069	225.261	160.487	123.438	283.116	308.727	283.878	170.147	338.857	220.407	178.651	182.361	133.469	24.6667	205.451	179.252	145.823	136.436
S(2,-2)SumEntrp	1.60303	1.45747	1.60615	1.64044	1.32872	1.17822	1.60656	1.61542	1.69596	1.54626	1.64239	1.67599	1.76296	1.74187	1.67917	1.62696	1.723	1.68329	1.60912	1.63048	1.69367	1.65989	1.55887	1.55518	1.32235	1.07703	1.72509	1.78249	1.49361	1.34186	1.59287	1.56819	1.60209	1.56686	1.12148	0.477121	1.35879	1.55033	1.39948	1.3777
S(2,-2)Entropy	2.15201	1.94751	2.34084	2.42441	1.78737	1.61609	2.23069	2.27175	2.42769	2.23223	2.30061	2.31148	2.67522	2.55995	2.3695	2.28495	2.55421	2.52699	2.40068	2.31422	2.62773	2.54002	2.25684	2.13747	1.69285	1.50515	2.52997	2.53428	1.94208	1.8279	2.18135	2.24441	2.33987	2.22424	1.53958	0.778151	1.76705	2.17025	1.83225	1.80952
S(2,-2)DifVarnc	80.9422	97.2313	67.1717	68.9407	47.7344	71.1756	30.0357	55.1796	39.9064	67.355	45.9188	70.7866	55.2433	56.0127	68.5371	96.5005	50.3517	48.9616	84.308	76.1267	64.4548	97.8344	42.9412	37.178	88.6879	105.188	44.6379	34.085	93.8451	94.0653	44.6928	81.0408	78.1719	86.3139	85.3333	14	71.3021	86.985	79.6319	93.1337
S(2,-2)DifEntrp	1.33563	1.37094	1.40901	1.39301	1.22506	1.0858	1.24453	1.35044	1.32066	1.3821	1.28038	1.3584	1.38264	1.39757	1.37449	1.41441	1.31618	1.35656	1.42194	1.37277	1.40397	1.46226	1.30004	1.25206	1.2035	1.12886	1.30498	1.2588	1.38742	1.30746	1.26228	1.39217	1.39665	1.3978	1.02114	0.477121	1.25977	1.39881	1.37644	1.31821
_Area_S(3,0)	148	88	256	332	46	46	186	192	402	246	256	232	650	446	280	208	560	474	340	266	590	396	214	158	48	26	466	458	118	78	198	180	250	190	20	6	94	166	82	88
S(3,0)AngScMom	0.00721329	0.0118802	0.00558472	0.00382857	0.0245747	0.0245747	0.0068216	0.00651042	0.0039603	0.00591579	0.00476074	0.0052393	0.00244734	0.00310684	0.00461735	0.00573225	0.00276148	0.00330253	0.00365052	0.00477698	0.00286125	0.00349454	0.00615774	0.008332	0.0208333	0.0414201	0.00307613	0.00312732	0.00876185	0.013478	0.00612182	0.00666667	0.0048	0.0067036	0.05	0.166667	0.0119964	0.00733053	0.0139798	0.0129132
S(3,0)Contrast	182.703	290.545	193.82	210.295	86.6522	274.826	162.484	201.625	76.2239	98.6748	149.938	190.009	139.72	173.821	169.25	201.558	127.843	127.688	194.776	226.383	149.359	198.631	143.85	151.911	203.917	345.154	196.339	100.397	249.559	260.615	136.859	173.433	194.272	223.484	385.2	11	300.277	193.349	73.7317	134.727
S(3,0)Correlat	0.258501	-0.209003	-0.0292831	-0.0104229	0.633688	-0.187416	0.0845496	-0.0445024	0.621379	0.403523	0.199981	0.0615603	0.270877	0.178642	0.117525	0.0769322	0.354305	0.331583	-0.025412	-0.265897	0.183469	0.0620638	0.169856	0.0235538	-0.0630657	-0.380338	0.0406289	0.490699	-0.0350779	-0.121499	0.406915	0.177164	0.0337197	-0.189748	-0.507514	0.60161	-0.384059	0.0218816	0.630061	0.260475
S(3,0)SumOfSqs	123.198	120.159	94.1531	104.063	118.276	115.724	88.7453	96.5173	100.66	82.7147	93.7087	101.236	95.8138	105.813	95.8951	109.178	98.9963	95.5151	94.9747	89.4162	91.4597	105.887	86.6419	77.7879	95.9097	125.025	102.327	98.5639	120.551	116.191	115.379	105.388	100.526	93.9208	127.76	13.8056	108.477	98.8374	99.6539	91.0904
S(3,0)InvDfMom	0.0685981	0.0381853	0.0978147	0.0680758	0.199265	0.115337	0.111821	0.107451	0.148582	0.129123	0.0957519	0.09198	0.0904636	0.0609777	0.0817169	0.0777885	0.120987	0.113242	0.0973345	0.0954999	0.106672	0.109733	0.127365	0.135807	0.0598936	0.123948	0.0793819	0.109081	0.0401084	0.0287836	0.110992	0.0621788	0.0892436	0.104786	0.0880261	0.205882	0.0199953	0.055742	0.102013	0.0851959
S(3,0)SumAverg	69.8649	72	65.5703	67.2711	65.2609	68.5652	70.2258	69.6875	68.4428	69.4715	66.5938	67.7328	67.1477	65.2825	67.75	68.3654	67.5214	66.3882	67.6471	66.5789	66.6678	65.1263	68.486	67.8861	69.1667	68.2308	66.9657	65.1397	69.3898	67.4872	66.697	66.8333	68.096	67.9684	63.6	49.6667	67.1702	64.8916	60.5122	58.0455
S(3,0)SumVarnc	310.09	190.091	182.792	205.957	386.454	188.072	192.497	184.444	326.416	232.184	224.897	214.937	243.535	249.431	214.33	235.155	268.142	254.373	185.122	131.281	216.479	224.918	202.717	159.24	179.722	154.947	212.969	293.858	232.645	204.147	324.656	248.117	207.831	152.199	125.84	44.2222	133.631	202	324.884	229.634
S(3,0)SumEntrp	1.63728	1.44156	1.61763	1.67186	1.2832	1.27332	1.56833	1.56153	1.72136	1.64625	1.66879	1.61497	1.74559	1.7313	1.62915	1.61431	1.73621	1.70565	1.63653	1.58811	1.68778	1.68879	1.55925	1.54404	1.22023	1.11394	1.70706	1.7534	1.54115	1.45213	1.67898	1.60689	1.61214	1.5724	1	0.477121	1.42218	1.57943	1.41994	1.4382
S(3,0)Entropy	2.14992	1.9308	2.29238	2.44405	1.62349	1.62349	2.19262	2.21822	2.45556	2.27401	2.34239	2.30061	2.65994	2.54572	2.36598	2.26017	2.60301	2.52489	2.46242	2.34793	2.59936	2.4958	2.24177	2.10814	1.68124	1.39182	2.55077	2.53891	2.06168	1.87666	2.23281	2.19923	2.33773	2.20665	1.30103	0.778151	1.9347	2.15934	1.86976	1.90343
S(3,0)DifVarnc	54.4624	66.907	76.4028	71.8785	38.862	116.941	61.4057	76.4648	30.2406	37.3774	55.1794	77.0264	50.3157	58.3786	50.5957	63.4952	55.5929	50.3665	76.8624	93.8739	55.1707	77.5202	67.3289	73.6225	55.8889	129.29	80.5688	37.9943	62.0086	71.7291	56.9458	60.8377	70.2615	83.2488	160.2	2	98.8782	63.993	24.0464	43.6116
S(3,0)DifEntrp	1.33571	1.36462	1.41233	1.42674	1.06391	1.20467	1.34697	1.40822	1.24846	1.28185	1.37676	1.39133	1.37177	1.38674	1.36496	1.41379	1.33708	1.345	1.42017	1.43199	1.38192	1.42737	1.30204	1.2835	1.14497	1.06763	1.40783	1.28583	1.36781	1.28027	1.32349	1.33651	1.39181	1.41522	1	0.276435	1.3558	1.34593	1.15221	1.28606
_Area_S(0,3)	142	86	248	338	78	46	232	222	330	194	224	220	688	468	288	230	514	434	340	276	624	408	204	160	56	28	466	492	86	66	174	162	256	202	30	4	56	142	68	66
S(0,3)AngScMom	0.00882761	0.0127096	0.0051704	0.00381639	0.0147929	0.0226843	0.00579667	0.00604659	0.00416896	0.00643001	0.0057398	0.00561983	0.00228586	0.00277595	0.00487076	0.00589792	0.00274039	0.00308989	0.00403114	0.00475215	0.00273258	0.00338812	0.00663206	0.00828125	0.0178571	0.0357143	0.00307613	0.00320576	0.0132504	0.0156107	0.0070683	0.00663009	0.00482178	0.00622488	0.0377778	0.25	0.0184949	0.00783575	0.016436	0.0165289
S(0,3)Contrast	206.366	243.372	164.315	212.207	285.154	240.609	162.569	171.162	180.406	206.443	114.179	196.182	164.006	208.632	154.514	173.417	176.35	197.816	205.059	226.297	165.808	246.363	202.078	249.925	292.893	266.429	145.609	109.703	156.256	182.455	126.54	232.802	213.062	257.812	127.067	365	229.536	210.085	435.676	386
S(0,3)Correlat	0.129825	-0.0178246	0.00840978	-0.0245964	-0.239061	-0.161332	0.116376	0.0677487	0.112009	-0.178138	0.326623	0.0182585	0.133127	0.0406528	0.289671	0.137305	0.0606652	-0.00897435	-0.0803946	-0.208389	0.0765279	-0.142662	-0.223543	-0.439829	-0.335454	-0.681804	0.238393	0.405265	0.315568	0.187717	0.443539	-0.0105797	-0.0644393	-0.234824	0.312773	-0.91601	0.00587506	-0.0185898	-0.718319	-0.595417
S(0,3)SumOfSqs	118.577	119.555	82.854	103.556	115.069	103.592	91.9899	91.8004	101.581	87.6142	84.7805	99.9152	94.5962	108.737	108.762	100.509	93.8697	98.0281	94.9	93.6358	89.7741	107.802	82.5792	86.7898	109.66	79.2092	95.5935	92.2287	114.15	112.31	113.701	115.183	100.082	104.392	92.4489	95.25	115.446	103.125	126.774	120.972
S(0,3)InvDfMom	0.136417	0.0388648	0.0980022	0.0710517	0.049399	0.0851862	0.0955457	0.109399	0.0840813	0.055043	0.0965657	0.0842389	0.0764579	0.072931	0.112602	0.118477	0.0723016	0.0685766	0.101277	0.10905	0.0889834	0.0866869	0.0949624	0.0683306	0.060453	0.0617298	0.104685	0.122523	0.095139	0.0852131	0.0961658	0.0511911	0.0643781	0.0587034	0.0425843	0.00285536	0.089901	0.106239	0.0637186	0.0921718
S(0,3)SumAverg	70	70.5814	66.5565	66.929	63.4615	69.7391	69.3793	70.1532	70.3697	68.4021	65.5536	66.1091	67.3721	66.5641	66.9167	68.6174	69.2062	68.129	67.1882	65.7174	66.7115	65.2157	68.3922	66.375	70.5357	71.8571	67.1288	65.8089	68.0698	67.0606	65.7356	68.5309	68.875	67.8119	67.0667	63	65.4643	64.6761	61.1471	62.4848
S(0,3)SumVarnc	267.944	234.848	167.102	202.019	175.12	173.758	205.391	196.04	225.918	144.014	224.944	203.479	214.379	226.314	280.535	228.619	199.129	194.297	174.541	148.246	193.289	184.846	128.238	97.2344	145.749	50.4082	236.765	259.211	300.344	266.784	328.263	227.928	187.266	159.757	242.729	16	232.249	202.416	71.4196	97.8861
S(0,3)SumEntrp	1.57516	1.40231	1.59805	1.63166	1.43669	1.17849	1.60993	1.61729	1.66245	1.55053	1.61376	1.64962	1.72585	1.72281	1.67375	1.64919	1.6906	1.67456	1.63435	1.59178	1.67485	1.66796	1.44481	1.3866	1.29664	1.10312	1.70202	1.71763	1.48817	1.44554	1.63024	1.60079	1.62662	1.58652	1.09582	0.30103	1.40415	1.58294	1.29894	1.36567
S(0,3)Entropy	2.08445	1.9065	2.31251	2.44385	1.84578	1.64967	2.27206	2.25548	2.40994	2.21332	2.26961	2.27127	2.69001	2.58597	2.35534	2.27139	2.59527	2.54174	2.43362	2.35419	2.61825	2.5092	2.22031	2.11097	1.74819	1.44716	2.54916	2.5417	1.89249	1.81042	2.17566	2.18722	2.34532	2.23157	1.43698	0.60206	1.73744	2.11837	1.79709	1.79218
S(0,3)DifVarnc	89.9695	80.3645	60.2416	79.2075	94.1473	65.9093	53.0419	61.3846	58.6047	63.1846	41.9286	78.3607	56.1842	72.9199	58.0924	70.0857	55.4358	65.7246	82.2403	96.0395	60.2189	94.9763	88.7186	98.0194	83.6773	78.3469	50.6097	37.5914	41.3175	64.1065	42.1961	70.7904	63.3826	77.8271	34.9067	4	77.7181	76.0468	127.364	114.25
S(0,3)DifEntrp	1.35702	1.30958	1.38104	1.43378	1.25241	1.18491	1.37078	1.34104	1.38508	1.39539	1.29414	1.39883	1.40477	1.45296	1.34123	1.36768	1.40769	1.42243	1.42021	1.4183	1.40416	1.46368	1.39799	1.37983	1.25891	1.06012	1.37793	1.33087	1.23702	1.21042	1.34233	1.40199	1.39583	1.43141	0.960255	0.30103	1.28853	1.37254	1.34104	1.28581
_Area_S(3,3)	114	62	220	308	36	38	172	164	318	176	220	206	612	410	254	202	470	392	316	258	550	362	170	122	40	18	428	426	88	52	156	136	224	178	6	0	62	124	60	58
S(3,3)AngScMom	0.0104648	0.0166493	0.00607438	0.0046593	0.0277778	0.0263158	0.00709843	0.00758477	0.00437087	0.00613378	0.00595041	0.00546706	0.00259516	0.00337894	0.00452601	0.00583276	0.00299683	0.00372241	0.00468675	0.00531819	0.0029686	0.00416654	0.00747405	0.0104811	0.025	0.0555556	0.00325356	0.00305275	0.012655	0.0214497	0.00747863	0.00886678	0.00566008	0.00656483	0.166667	0	0.0176899	0.00949532	0.0172222	0.019025
S(3,3)Contrast	214.474	220.839	165.873	219.39	298	278.263	278.047	281.976	197.245	217	143.527	190.087	189.435	231.361	204.15	233.921	182.145	187.015	208.177	199.14	163.68	173.983	222.482	238.148	167.15	141.667	176.752	105.667	247.432	164.192	268.654	298.426	183.768	209.719	108	0	258.355	180.403	334.867	354.241
S(3,3)Correlat	0.0942779	-0.0201506	0.0563227	-0.0778069	-0.10913	-0.245442	-0.323339	-0.348049	0.0254858	-0.194832	0.261729	0.0865954	0.0214196	-0.0760035	0.0515914	-0.0149238	0.00327369	-0.00975641	-0.123258	-0.00934715	0.1259	0.183916	-0.146544	-0.208476	-0.0267909	0.255378	0.108183	0.465472	-0.0860946	0.15138	-0.179526	-0.305323	0.10253	0.059582	-0.533123	0	-0.203051	0.116236	-0.438238	-0.437875
S(3,3)SumOfSqs	118.399	108.238	87.8864	101.776	134.34	111.713	105.055	104.587	101.202	90.8077	97.205	104.054	96.7905	107.509	107.627	115.241	91.3715	92.6042	92.6667	98.6477	93.6278	106.597	97.023	98.5322	81.3944	95.1265	99.0968	98.8411	113.909	96.7408	113.882	114.311	102.381	111.503	35.2222	0	107.375	102.065	116.416	123.182
S(3,3)InvDfMom	0.0572641	0.0817335	0.0618676	0.0820706	0.0403001	0.071171	0.068984	0.0623122	0.074468	0.0700028	0.0648166	0.0517315	0.0817684	0.0768543	0.064362	0.0565732	0.0555847	0.0587866	0.071626	0.0654659	0.105509	0.0968656	0.0587563	0.0425733	0.0375517	0.0363397	0.09959	0.118886	0.0931811	0.128151	0.0771385	0.118624	0.106076	0.0928125	0.0136067	0	0.132356	0.0841945	0.066642	0.0751858
S(3,3)SumAverg	68.4386	68.5806	65	66.4416	67.5556	66.7895	68.3256	68.5366	70.1509	69.2955	66.6727	66.9223	67.4216	64.7268	68.4961	68.4752	68.8426	67.2704	69.0633	65.6977	66.4727	64.9227	66.8824	65.9508	69.15	64.7778	66.7336	65.4131	67.5227	69.8077	65.3718	67.2206	67.8929	66.4607	53.3333	0	67.129	63.6935	62.2667	61.8276
S(3,3)SumVarnc	259.123	212.114	185.673	187.714	239.358	168.587	142.173	136.371	207.562	146.231	245.293	226.13	197.728	198.677	226.36	227.041	183.341	183.401	162.49	195.451	210.831	252.403	165.61	155.981	158.428	238.84	219.635	289.698	208.204	222.771	186.875	158.819	225.756	236.293	32.8889	0	171.145	227.858	130.796	138.488
S(3,3)SumEntrp	1.51672	1.39426	1.62019	1.63486	1.18838	1.24707	1.53541	1.48335	1.65296	1.55614	1.64001	1.62701	1.70328	1.68615	1.65493	1.58464	1.67805	1.67517	1.59286	1.5942	1.70193	1.68485	1.49404	1.40696	1.24082	0.887347	1.68291	1.75116	1.43639	1.29919	1.54028	1.50764	1.63462	1.612	0.477121	0	1.38692	1.52287	1.21623	1.3014
S(3,3)Entropy	1.99881	1.78268	2.24798	2.37565	1.5563	1.57978	2.16902	2.14142	2.40564	2.22157	2.25619	2.27587	2.63831	2.5129	2.36454	2.25541	2.56541	2.47424	2.37394	2.30542	2.58298	2.4281	2.1534	2.00861	1.60206	1.25527	2.52698	2.54531	1.91027	1.68127	2.14295	2.08042	2.27499	2.19968	0.778151	0	1.76326	2.04001	1.76812	1.73229
S(3,3)DifVarnc	79.1801	75.2862	58.8443	84.8899	62.8889	83.7341	83.3467	85.9756	66.5098	81.0656	36.1223	53.6741	66.4857	78.2053	61.4694	71.2952	54.0215	55.5855	65.6922	56.8091	62.9514	58.0346	83.7971	82.5117	40.5875	34.8889	65.5188	39.4697	98.4809	57.1494	71.5754	99.5335	71.6349	77.5983	8	0	91.0281	61.8743	78.8667	97.1367
S(3,3)DifEntrp	1.28307	1.28249	1.32916	1.43659	1.07541	1.152	1.42189	1.43338	1.42336	1.38951	1.30043	1.35985	1.42558	1.46433	1.41007	1.41082	1.40488	1.40418	1.44224	1.39263	1.40047	1.40854	1.35899	1.34435	1.15051	0.887347	1.40615	1.32119	1.31325	1.13404	1.4245	1.41576	1.38621	1.38709	0.276435	0	1.27516	1.34918	1.28893	1.35076
_Area_S(3,-3)	120	72	212	296	42	24	178	186	308	176	186	186	616	420	240	178	496	412	274	208	570	376	190	138	32	16	418	428	66	48	146	156	210	160	22	0	38	126	46	50
S(3,-3)AngScMom	0.00930556	0.0142747	0.00556248	0.00420015	0.0272109	0.0451389	0.00883727	0.00791999	0.00442739	0.00716684	0.0068216	0.00687941	0.00262481	0.00331066	0.00534722	0.00694357	0.00321117	0.00345226	0.00471522	0.00568602	0.00297322	0.00319715	0.00620499	0.00913674	0.0332031	0.0703125	0.00365147	0.00351559	0.0151515	0.0208333	0.00778758	0.00739645	0.00603175	0.00789063	0.0454545	0	0.0263158	0.00932225	0.0226843	0.0208
S(3,-3)Contrast	346.883	381.472	181.764	206.182	255.381	267.833	112.921	159.161	178.591	216.727	122.882	155.957	145.094	153.124	178.833	219.494	159.585	180.325	193.197	154	162.568	229.537	145.526	139.87	386.562	375.375	129.105	104.028	219.061	413.042	145.301	259.385	162.876	164.35	410.545	0	362.105	251.492	448.696	384.84
S(3,-3)Correlat	-0.337173	-0.561754	0.0785954	0.0254214	-0.714449	-0.324906	0.32543	0.139414	0.107485	-0.269591	0.263392	0.131106	0.249003	0.264532	0.109558	0.030172	0.146064	-0.00701469	-0.023216	0.1922	0.161116	-0.123116	0.288719	0.0834588	-0.597998	-0.589783	0.319049	0.469774	-0.109565	-0.496307	0.408899	-0.0658475	0.106363	0.15914	-0.818568	0	-0.552531	-0.195605	-0.707798	-0.5663
S(3,-3)SumOfSqs	129.708	122.129	98.6343	105.78	74.479	101.076	83.6988	92.4727	100.049	85.3532	83.4106	89.7446	96.601	104.1	100.418	113.162	93.4406	89.5346	94.4068	95.3206	96.8956	102.188	102.299	76.3029	120.952	118.059	94.7977	98.0979	98.7146	138.02	122.907	121.68	91.1311	97.7273	112.876	0	116.618	105.174	131.367	122.85
S(3,-3)InvDfMom	0.0462585	0.0569443	0.0876405	0.0935253	0.0674975	0.0988306	0.120073	0.107339	0.10607	0.106801	0.0914047	0.0778703	0.0911222	0.0784915	0.0781288	0.0776383	0.0951116	0.0782824	0.0871393	0.0899991	0.0789883	0.061029	0.096502	0.131523	0.0795489	0.128367	0.0935336	0.108669	0.0547633	0.0464109	0.0728947	0.0752737	0.106615	0.120063	0.0173243	0	0.0390396	0.0598801	0.0503668	0.0702967
S(3,-3)SumAverg	71.55	68.8056	64.2925	68.0203	58.5238	61.1667	68.6292	68.043	70.3571	69.7955	65.0538	64.3441	66.8929	66.4381	67.4	66.6404	68.0605	67.4903	66.5985	64.5769	65.8035	63.4309	67.3158	67.6957	61.4375	53.875	66.6746	65.8598	65.6667	66.0417	67.0274	66.8462	67.2381	65.375	65.6364	0	61.0526	63.4921	63.4783	66.2
S(3,-3)SumVarnc	171.947	107.046	212.773	216.939	42.5351	136.472	221.874	210.729	221.606	124.685	210.761	203.021	241.31	263.275	222.84	233.152	214.178	177.813	184.43	227.283	225.014	179.213	263.669	165.342	97.2461	96.8594	250.086	288.364	175.798	139.04	346.328	227.335	201.648	226.559	40.9587	0	104.366	169.202	76.7713	106.56
S(3,-3)SumEntrp	1.49832	1.25306	1.6052	1.68524	1.08204	0.959901	1.51412	1.56164	1.67357	1.53385	1.55009	1.58775	1.73071	1.74102	1.60889	1.62256	1.68835	1.67306	1.61263	1.66718	1.69128	1.65456	1.56419	1.4805	1.12886	0.827832	1.72801	1.7397	1.35879	1.25478	1.59681	1.53106	1.56356	1.5206	0.98666	0	1.10836	1.49239	1.22097	1.29252
S(3,-3)Entropy	2.04406	1.84897	2.27238	2.4006	1.58024	1.35513	2.12182	2.16263	2.39716	2.16683	2.19506	2.19183	2.63169	2.51679	2.30429	2.1836	2.54128	2.49796	2.35699	2.26307	2.59632	2.51434	2.22489	2.06135	1.48634	1.16649	2.4872	2.50502	1.81954	1.68124	2.12312	2.14681	2.24194	2.1251	1.34242	0	1.57978	2.05376	1.64967	1.68693
S(3,-3)DifVarnc	104.043	99.0455	69.9235	84.1397	81.3923	81.0556	36.8986	52.6056	63.0982	86.5599	40.1304	53.7949	54.0404	50.6323	61.1108	78.4454	57.884	63.6643	72.3576	56.6742	61.0186	83.616	59.5251	58.347	108.09	73.4844	47.2417	39.7286	77.2342	122.623	43.9268	81.6068	59.8054	64.8494	130.744	0	116.111	91.8508	105.641	119.802
S(3,-3)DifEntrp	1.40423	1.34216	1.36411	1.41035	1.16805	1.07918	1.22696	1.35158	1.39728	1.38238	1.27186	1.32451	1.36165	1.38159	1.37007	1.40528	1.38399	1.39592	1.40773	1.36267	1.38472	1.45035	1.30238	1.27619	1.09123	0.827832	1.33547	1.29718	1.28581	1.27987	1.31045	1.43324	1.36213	1.31919	0.98666	0	1.21538	1.35119	1.23085	1.30161
_Area_S(4,0)	126	70	232	298	28	32	152	160	378	228	232	208	596	404	248	178	526	444	306	236	540	358	188	134	34	16	428	414	102	64	176	156	220	164	8	0	82	144	70	78
S(4,0)AngScMom	0.00856639	0.015102	0.00535077	0.00427909	0.0357143	0.03125	0.00787742	0.00773437	0.00443717	0.00604032	0.00557372	0.00628698	0.00263502	0.00316145	0.00523543	0.00713294	0.00331073	0.00353056	0.00410099	0.00570957	0.00316872	0.00365157	0.00650747	0.00902205	0.0294118	0.0625	0.0032754	0.00350067	0.0103806	0.0180664	0.00677944	0.00772518	0.00549587	0.00684117	0.125	0	0.0133849	0.00771605	0.0155102	0.0138067
S(4,0)Contrast	267.889	373	197.802	244.114	105.571	313.125	224.395	252.825	104.021	124.316	164.276	190.644	128.342	158.985	169.952	224.034	142.703	148.824	179.627	196.831	172.615	246.564	162.277	177.582	259.706	381.375	203.5	106.594	340.922	265.219	175.364	185.795	204.445	230.659	232.5	0	309.171	202.472	91.2571	168.282
S(4,0)Correlat	-0.0770016	-0.492563	0.0306745	-0.188422	0.591568	-0.212818	-0.250228	-0.259577	0.468995	0.261316	0.150159	0.0411956	0.316507	0.253428	0.124306	0.0322281	0.25625	0.207626	0.00554672	-0.130041	0.0321753	-0.187836	0.0501767	-0.134468	-0.188924	-0.364528	-0.010407	0.450184	-0.313528	-0.227934	0.221532	0.148079	-0.0510533	-0.216041	-0.485623	0	-0.426999	-0.140242	0.514986	0.194167
S(4,0)SumOfSqs	124.368	124.953	102.031	102.705	129.24	129.09	89.7415	100.361	97.9475	84.1468	96.6509	99.4177	93.887	106.477	97.0382	115.747	95.9351	93.9104	90.3147	87.09	89.1767	103.787	85.4246	78.2667	109.219	139.746	100.702	96.9363	129.773	107.994	112.634	109.045	97.2574	94.84	78.25	0	108.329	88.7847	94.0767	104.415
S(4,0)InvDfMom	0.0602318	0.0913874	0.0955973	0.0857974	0.0698316	0.0190597	0.0750919	0.0658182	0.125474	0.0933461	0.0886908	0.0731206	0.111226	0.0986748	0.0864272	0.118467	0.147266	0.135045	0.0835681	0.0804946	0.0860972	0.0612088	0.103884	0.114753	0.100394	0.0936626	0.0918987	0.12219	0.0505388	0.07891	0.0687911	0.0800767	0.0846049	0.080966	0.00637817	0	0.0591022	0.0915587	0.102394	0.0804509
S(4,0)SumAverg	70.8095	71.4	65.681	67.4966	62.4286	65.375	70.1842	68.925	69.2593	69.7895	66.7069	68.0481	67.4362	65.8465	67.5161	68.0112	67.5627	66.3649	66.8301	65.4068	67.163	64.5307	68.2979	68.0896	66.6471	63.125	66.1542	64.5845	69.5098	65.1562	66.3182	67.641	67.0818	66.3902	54	0	65.4146	63.8333	61.0857	59.5128
S(4,0)SumVarnc	229.583	126.811	210.321	166.706	411.388	203.234	134.571	148.619	287.769	212.271	222.328	207.027	247.206	266.922	218.201	238.955	241.037	226.817	181.631	151.529	184.092	168.584	179.422	135.485	177.17	177.609	199.308	281.151	178.171	166.757	275.171	250.384	184.584	148.701	80.5	0	124.145	152.667	285.05	249.378
S(4,0)SumEntrp	1.53879	1.35907	1.58863	1.61046	1.14613	1.09123	1.47375	1.50948	1.71112	1.60102	1.63618	1.59504	1.73543	1.73457	1.64082	1.53911	1.71061	1.69793	1.58821	1.5748	1.65348	1.60423	1.55958	1.47161	1.19503	0.90309	1.67464	1.73431	1.48171	1.31452	1.63648	1.55523	1.58428	1.51415	0.60206	0	1.38143	1.50239	1.42366	1.43086
S(4,0)Entropy	2.07648	1.8279	2.30125	2.39794	1.44716	1.50515	2.12243	2.13731	2.42332	2.25096	2.28891	2.23625	2.63024	2.52478	2.31736	2.18277	2.54439	2.50359	2.41292	2.28487	2.55747	2.47021	2.20691	2.0642	1.53148	1.20412	2.52379	2.49734	1.99089	1.75914	2.19162	2.13137	2.28289	2.17813	0.90309	0	1.88445	2.12491	1.8193	1.86894
S(4,0)DifVarnc	73.22	106.844	69.2921	82.7047	36.9184	91.8594	74.0097	79.9025	40.1904	45.5112	55.1094	70.278	49.7404	61.8358	52.1241	80.3032	63.0665	62.6357	63.7486	73.2063	60.7254	85.3168	66.9027	76.3845	78.2491	129.359	82.6028	41.4295	79.2434	82.124	62.2314	69.8185	65.8483	76.5354	22.25	0	122.615	75.284	32.6253	57.2229
S(4,0)DifEntrp	1.36503	1.35907	1.43198	1.45854	0.931107	1.09123	1.41919	1.4256	1.29241	1.31976	1.36531	1.37297	1.36183	1.37596	1.38039	1.43938	1.35918	1.35738	1.40538	1.39708	1.40554	1.46363	1.31065	1.31482	0.991223	0.827832	1.42384	1.31333	1.40799	1.3028	1.35821	1.37489	1.37503	1.39954	0.451545	0	1.31715	1.34087	1.16985	1.23396
_Area_S(0,4)	116	68	218	306	66	34	212	198	282	156	188	190	646	432	258	204	464	388	306	246	584	374	176	136	42	20	428	458	64	48	146	136	228	178	20	0	32	116	48	44
S(0,4)AngScMom	0.00980975	0.0155709	0.00635468	0.00422914	0.0179063	0.0294118	0.00582948	0.00586675	0.00467783	0.007643	0.00667723	0.0065374	0.00263589	0.00310785	0.00465717	0.00615148	0.00272183	0.00317515	0.00474177	0.0055853	0.0030259	0.00361749	0.00684401	0.0100562	0.0260771	0.05	0.00330815	0.0032036	0.0166016	0.0243056	0.00797523	0.00854239	0.00519391	0.00681732	0.055	0	0.03125	0.00980975	0.0208333	0.0247934
S(0,4)Contrast	277.845	283.971	141.899	197.771	313	205.118	211.962	209.707	221.574	251.231	98.5851	156.811	192.622	256.44	195.333	212.304	221.453	239.691	205.928	200.398	170.716	230.15	212.5	243.971	354.714	286.3	162.93	131.541	191.188	212.875	152.027	249.618	247.316	290.393	101.8	0	327.188	258.897	470.667	372.364
S(0,4)Correlat	-0.163623	-0.185992	0.138491	0.0385403	-0.412173	-0.0390255	-0.143073	-0.209274	-0.0839018	-0.27517	0.406407	0.225645	-0.0130766	-0.14829	0.116646	-0.0791352	-0.158093	-0.184421	-0.078971	-0.0667257	0.0470137	-0.0594746	-0.248755	-0.308812	-0.543568	-0.804544	0.12858	0.259087	0.263152	0.031098	0.339089	0.00665767	-0.219043	-0.367292	0.353158	0	-0.253977	-0.238634	-0.84638	-0.793095
S(0,4)SumOfSqs	119.388	119.719	82.355	102.849	110.822	98.7067	92.716	86.7078	102.212	98.5087	83.0411	101.252	95.068	111.662	110.563	98.3676	95.6109	101.185	95.428	93.9315	89.5688	108.615	85.0847	93.2031	114.901	79.3275	93.4853	88.7699	129.733	109.854	115.014	125.645	101.439	106.193	78.69	0	130.46	104.509	127.457	103.833
S(0,4)InvDfMom	0.121458	0.058732	0.119004	0.0841381	0.0956058	0.0502477	0.0593281	0.0594029	0.0989087	0.0958244	0.12555	0.122148	0.0675078	0.0659585	0.0748559	0.0958834	0.0605704	0.061858	0.0831867	0.067989	0.0814818	0.0729502	0.103826	0.0709854	0.0332998	0.0271495	0.0828919	0.105958	0.029902	0.112618	0.0821817	0.0601839	0.0616412	0.0638099	0.133374	0	0.0692717	0.0512777	0.0156619	0.0139778
S(0,4)SumAverg	70.0172	69.0882	66.3211	67.183	63.7879	64.7647	69.1509	70.3131	69.9291	67.2051	66.3936	65.6737	67.2167	66.2917	67.7985	69.6569	69.2716	67.8454	66.6471	64.8049	66.7158	64.4385	68.4545	66.2647	67.6667	66.3	66.7056	65.6987	67.4375	67.2917	65.9726	67.3529	67.9825	66.1236	66.2	0	65.8125	63.5862	66.9167	69.1818
S(0,4)SumVarnc	199.707	194.904	187.521	213.627	130.288	189.709	158.902	137.124	187.272	142.804	233.579	248.199	187.65	190.207	246.921	181.167	160.991	165.048	175.784	175.328	187.56	204.31	127.839	128.842	104.889	31.01	211.011	223.538	327.746	226.54	308.027	252.964	158.438	134.378	212.96	0	194.652	159.139	39.1597	42.9669
S(0,4)SumEntrp	1.52331	1.33435	1.60177	1.66047	1.30405	1.1242	1.56259	1.5614	1.62387	1.51296	1.57566	1.63598	1.69945	1.65939	1.66643	1.59942	1.67146	1.6645	1.63021	1.59052	1.66929	1.65547	1.48571	1.40077	1.13938	0.879588	1.65657	1.7059	1.35464	1.19514	1.60034	1.56572	1.54503	1.52326	0.939794	0	1.16649	1.45861	1.14497	1.10283
S(0,4)Entropy	2.02294	1.8148	2.2383	2.40899	1.76481	1.53148	2.25534	2.24801	2.35949	2.13523	2.1973	2.21855	2.63261	2.53756	2.35385	2.2329	2.5906	2.52521	2.36763	2.29424	2.58171	2.47507	2.18394	2.04057	1.59458	1.30103	2.51851	2.53693	1.78737	1.63107	2.11487	2.09035	2.30577	2.19037	1.27093	0	1.50515	2.0294	1.68124	1.61609
S(0,4)DifVarnc	124.17	90.4334	53.8148	69.1786	119.537	73.5433	59.23	62.0478	70.3368	81.5634	37.446	59.1129	67.2239	90.9125	71.7617	83.1919	75.4804	87.1555	75.2518	71.0309	62.8263	85.3786	98.8838	100.676	91.0385	70.21	57.3399	45.1083	42.6523	71.8594	50.3768	87.4299	73.261	92.1848	31.24	0	92.7148	80.8121	119.104	77.1488
S(0,4)DifEntrp	1.3369	1.22054	1.327	1.41818	1.28581	1.08879	1.40914	1.40822	1.43589	1.42892	1.25883	1.34964	1.42654	1.46597	1.39242	1.40368	1.43501	1.44937	1.42149	1.37738	1.4053	1.44797	1.3604	1.32003	1.13938	0.879588	1.38536	1.34689	1.20873	1.22023	1.34409	1.39409	1.43277	1.44738	0.939794	0	1.0536	1.35344	1.2704	1.11316
_Area_S(4,4)	84	36	182	264	18	22	132	124	268	136	184	172	546	356	212	168	408	332	276	224	490	312	132	90	24	4	378	370	64	32	122	98	186	146	0	0	40	92	40	38
S(4,4)AngScMom	0.0127551	0.037037	0.00742664	0.00487833	0.0555556	0.053719	0.00769054	0.00897503	0.00515148	0.00865052	0.00620274	0.00676041	0.00281099	0.00375584	0.00533998	0.00680272	0.00327999	0.0037197	0.00480466	0.00585938	0.00304873	0.00433514	0.00929752	0.0123457	0.0416667	0.25	0.00330338	0.00357925	0.0166016	0.03125	0.00954045	0.0106206	0.00601226	0.00778758	0	0	0.02625	0.0113422	0.0275	0.031856
S(4,4)Contrast	209.857	178.333	148.363	193.295	506	305.182	340.576	324.452	227.269	230.074	190.174	245.465	192.484	220.618	284.132	308.226	200.211	217.56	211.855	176.455	189.294	176.923	211.136	171.022	154.417	202.5	184.645	106.492	398.594	150.875	371.475	318	161.763	192.671	0	0	279.3	184.652	321.6	324.789
S(4,4)Correlat	-0.150481	-0.259317	0.182835	0.0519183	-0.533104	-0.531955	-0.565324	-0.490975	-0.107862	-0.178344	-0.00831012	-0.154949	0.00605267	-0.0654949	-0.219873	-0.225477	-0.0558193	-0.0903856	-0.149656	0.0296658	0.0481888	0.148657	0.0553605	0.271476	-0.148821	-0.885914	0.0928044	0.443075	-0.496783	-0.282763	-0.561604	-0.33333	0.188559	0.129147	0	0	-0.113104	0.191834	-0.579607	-0.565857
S(4,4)SumOfSqs	91.2041	70.8056	90.7789	101.94	165.025	99.6054	108.788	108.805	102.571	97.6258	94.3033	106.267	96.8278	103.528	116.46	125.758	94.813	99.763	92.1385	90.925	99.4388	103.908	111.755	117.376	67.2066	53.6875	101.767	95.607	133.15	58.8086	118.94	119.25	99.6766	110.622	0	0	125.46	114.241	101.797	103.71
S(4,4)InvDfMom	0.0659453	0.0519687	0.110507	0.104	0.00684095	0.0209219	0.053218	0.057308	0.041421	0.0367721	0.0719697	0.0809588	0.096624	0.0730316	0.0517085	0.0704678	0.0598064	0.0638612	0.0922822	0.0816519	0.0830125	0.0925201	0.0764016	0.0734578	0.0859189	0.00763602	0.0632305	0.0847148	0.0647385	0.0776623	0.0324632	0.0545444	0.116523	0.103626	0	0	0.0916703	0.0964475	0.00772258	0.00785965
S(4,4)SumAverg	65.4286	64.3333	65.5495	65.2955	68.8889	60.8182	65.303	64.8065	68.9851	67.1618	66.9348	67.1628	67.5311	64.5393	69.3774	68.869	68.3873	67.2108	68.4783	64.7768	65.9959	64.4615	66.6818	65.9111	62.5833	61.5	66.6667	65.2054	66.8438	68.125	64.3279	65.7551	67.1183	66.0685	0	0	71.4	65.3478	67.9	68.0526
S(4,4)SumVarnc	154.959	104.889	214.753	214.466	154.099	93.2397	94.5748	110.769	183.015	160.43	187.039	179.601	194.828	193.496	181.707	194.804	179.041	181.492	156.699	187.245	208.461	238.71	235.884	298.481	114.41	12.25	222.423	275.936	134.007	84.3594	104.286	159.001	236.943	249.817	0	0	222.54	272.314	85.59	90.0499
S(4,4)SumEntrp	1.38848	1.05459	1.57743	1.65924	0.954243	0.877195	1.41754	1.43242	1.63484	1.48064	1.59727	1.56983	1.68824	1.65731	1.63393	1.56271	1.67048	1.64575	1.58144	1.59759	1.6979	1.68818	1.55603	1.45076	0.978838	0.30103	1.70255	1.74427	1.32872	1.09123	1.48986	1.5089	1.63478	1.58032	0	0	1.21072	1.50397	1.18062	1.10836
S(4,4)Entropy	1.90278	1.45596	2.17818	2.34691	1.25527	1.28769	2.11601	2.05943	2.33713	2.08042	2.22228	2.18652	2.59904	2.46417	2.28658	2.1823	2.51435	2.45267	2.35419	2.26287	2.55715	2.39909	2.05784	1.92079	1.38021	0.60206	2.50263	2.48316	1.78737	1.50515	2.03701	1.97894	2.23391	2.12312	0	0	1.58701	1.9507	1.57196	1.51641
S(4,4)DifVarnc	68.1338	54.8765	59.6718	79.6792	114.84	90.9587	97.0266	97.512	61.3589	67.511	60.4121	87.1736	74.606	74.1808	85.4817	108.542	54.6773	64.6059	74.3879	48.8864	76.5875	62.8716	90.4695	63.7847	52.7431	20.25	60.2463	33.0887	155.429	60.625	95.1529	122	69.7685	83.9977	0	0	86.09	63.6522	59.16	67.1025
S(4,4)DifEntrp	1.32312	0.975066	1.33753	1.3946	0.887347	0.747071	1.4262	1.37746	1.42288	1.33167	1.39261	1.41385	1.43775	1.45135	1.41046	1.43825	1.40947	1.43125	1.43299	1.39019	1.40942	1.40757	1.3055	1.19168	0.978838	0.30103	1.40763	1.30311	1.26517	1.0394	1.39178	1.40072	1.32529	1.30943	0	0	1.21072	1.32329	1.18062	1.03302
_Area_S(4,-4)	100	52	170	250	22	6	142	152	256	138	144	148	556	370	194	138	442	362	222	160	512	328	156	110	12	2	364	374	36	26	112	128	168	122	12	0	12	96	26	26
S(4,-4)AngScMom	0.0108	0.0199704	0.00629758	0.004768	0.0495868	0.222222	0.00773656	0.00735803	0.00497437	0.0094518	0.0085841	0.00830898	0.00275607	0.00363769	0.00584547	0.00745642	0.00329641	0.00384604	0.00507264	0.00664062	0.00310516	0.00392252	0.00846483	0.0112397	0.0972222	0.5	0.00381898	0.0034888	0.0277778	0.0384615	0.0098852	0.00878906	0.00687358	0.00859984	0.0833333	0	0.0972222	0.0115017	0.0384615	0.0384615
S(4,-4)Contrast	351.36	375.885	223.235	218.264	205.727	112.667	110.141	151.079	206.836	235.116	145.736	154.176	185.219	191.546	168.392	231.42	173.113	187.641	203.396	193.3	143.094	171.128	196.679	157.018	192.667	1	140.082	124.364	70.5556	557.462	173.429	309.125	151.321	168.721	578.667	0	115.5	228.625	366.538	347.077
S(4,-4)Correlat	-0.399952	-0.599816	-0.047747	-0.0384585	-0.311642	-0.550459	0.376669	0.214332	-0.00241626	-0.227887	0.161964	0.177374	0.0421534	0.0961834	0.203526	-0.00303699	0.0973413	-0.0116459	0.00939182	0.0940832	0.267701	0.183661	0.0699602	-0.0569486	-0.625879	-1	0.245611	0.343142	-0.0744501	-0.616066	0.260414	-0.295064	0.220559	0.210335	-0.947644	0	-0.593409	-0.111971	-0.875501	-0.730061
S(4,-4)SumOfSqs	125.49	117.477	106.531	105.09	78.4236	36.3333	88.3485	96.1468	103.169	95.74	86.951	93.7094	96.6853	105.965	105.711	115.36	95.8907	92.7404	102.662	106.688	97.7018	104.814	105.737	74.279	59.25	0.25	92.8449	94.6656	32.8333	172.475	117.247	119.347	97.0705	106.831	148.556	0	36.2431	102.802	97.7175	100.308
S(4,-4)InvDfMom	0.0623211	0.0486202	0.0814265	0.1289	0.120299	0.341149	0.139702	0.0999721	0.068459	0.0719043	0.102925	0.0839058	0.0808559	0.0824377	0.0982502	0.0570227	0.0926812	0.0710545	0.0847665	0.0875985	0.078832	0.0827886	0.110364	0.111241	0.175324	0.5	0.0949335	0.0921499	0.112119	0.0542786	0.11353	0.0687939	0.0899062	0.078589	0.00880162	0	0.181147	0.0755337	0.0491551	0.0383181
S(4,-4)SumAverg	68.6	63.1154	64.9294	67.592	56.8182	48	68.9859	67.7895	69.5703	68.1594	65.2917	64.0135	67.1187	66.4757	66.8866	66.2609	68.1448	67.6851	65.5766	65	65.7109	63.3963	66.3205	65.7818	47	39	66.4121	65.893	61.3333	64.8462	67.6071	66.2188	66.9405	66.5902	62.6667	0	44.8333	61.5417	72.2308	76
S(4,-4)SumVarnc	150.6	94.0251	202.889	202.098	107.967	32.6667	243.253	233.508	205.839	147.844	202.068	220.662	201.522	232.314	254.451	230.019	210.45	183.321	207.253	233.45	247.713	248.13	226.269	140.098	44.3333	0	231.297	254.299	60.7778	132.438	295.56	168.265	236.961	258.603	15.5556	0	29.4722	182.582	24.3314	54.1538
S(4,-4)SumEntrp	1.3987	1.29045	1.59638	1.63322	0.856536	0.477121	1.57196	1.58262	1.64796	1.50497	1.49414	1.52952	1.71682	1.7047	1.65035	1.55732	1.67658	1.63843	1.63538	1.61905	1.71253	1.65743	1.46412	1.37423	0.778151	0	1.69467	1.71173	1.12148	1.06763	1.55325	1.4968	1.60842	1.57676	0.778151	0	0.677808	1.41925	0.911214	0.975006
S(4,-4)Entropy	1.97592	1.70443	2.2092	2.34496	1.31506	0.677808	2.12261	2.1462	2.33178	2.05913	2.08729	2.10617	2.60859	2.46811	2.25366	2.13115	2.52008	2.45349	2.30839	2.18531	2.54959	2.43417	2.10436	1.97024	1.02901	0.30103	2.45109	2.48634	1.5563	1.41497	2.01696	2.06958	2.18318	2.07156	1.07918	0	1.02901	1.95091	1.41497	1.41497
S(4,-4)DifVarnc	100.454	98.534	83.9953	94.0753	84.7273	48.6667	38.2496	47.8961	66.0058	80.8523	55.7498	61.8599	66.3467	60.7218	54.3205	70.2407	61.5766	63.46	65.1751	63.34	49.6996	54.2509	79.3184	59.9061	64.2222	0	47.3095	44.6101	29.0247	196.462	69.8253	106.952	45.2805	53.7748	178.667	0	31.4722	81.6094	108.071	142.367
S(4,-4)DifEntrp	1.41369	1.25288	1.33081	1.40981	0.931927	0.477121	1.26966	1.33813	1.4012	1.39005	1.29217	1.30383	1.41573	1.38998	1.34304	1.36548	1.40599	1.42745	1.39575	1.37287	1.35842	1.39207	1.33969	1.32363	0.677808	0	1.34714	1.32839	0.995889	1.06763	1.33783	1.44403	1.35078	1.3541	0.778151	0	0.778151	1.32854	1.11394	1.02132
_Area_S(5,0)	104	56	208	266	12	20	122	130	354	210	210	184	546	362	216	148	496	414	274	206	492	320	162	112	20	10	390	372	86	50	154	136	190	138	2	0	70	124	56	66
S(5,0)AngScMom	0.010355	0.0191327	0.00600962	0.00500311	0.0833333	0.05	0.00886858	0.00804734	0.00453254	0.00643991	0.00612245	0.0067344	0.00272377	0.00372394	0.00501543	0.00712199	0.00309736	0.00336064	0.0046353	0.00584409	0.00337101	0.00410156	0.00731596	0.0098852	0.05	0.1	0.00380013	0.00381547	0.0124392	0.0224	0.00750548	0.00821799	0.00637119	0.00829658	0.5	0	0.0142857	0.0102758	0.0210459	0.0174472
S(5,0)Contrast	320.327	297.643	201.683	255.632	221.667	371.2	264.852	296.954	130.791	137.229	177.724	197.207	158.956	199.37	196.667	245.851	149.476	162.237	154.277	176.184	195.675	278.25	186.346	218.661	271.8	475	195.979	110.78	357.977	292.56	199.234	213.765	210.463	232.449	144	0	250.571	206.806	105.5	195.03
S(5,0)Correlat	-0.372773	-0.49265	0.0701539	-0.273514	0.277567	-0.48231	-0.399225	-0.408538	0.332695	0.214067	0.118376	0.0265288	0.167123	0.054707	0.0732176	-0.0160975	0.215357	0.122365	0.15205	0.0301646	-0.11595	-0.399991	-0.101158	-0.285729	-0.477013	-0.572744	0.010617	0.439731	-0.42648	-0.37071	0.0917184	0.0612584	-0.0836436	-0.173296	-1	0	-0.432271	-0.147532	0.383409	0.0981095
S(5,0)SumOfSqs	116.672	99.7028	108.45	100.365	153.417	125.21	94.6426	105.412	97.9994	87.303	100.793	101.29	95.4259	105.454	106.102	120.978	95.2508	92.4284	90.9707	90.8321	87.6718	99.3756	84.6135	85.0337	92.01	151.01	99.0413	98.8629	125.476	106.718	109.676	113.857	97.109	99.0582	36	0	87.4735	90.1093	85.551	108.123
S(5,0)InvDfMom	0.0244703	0.030278	0.0730628	0.0783037	0.0188376	0.0181666	0.0591233	0.0597385	0.130635	0.0929769	0.0854729	0.0958042	0.0812116	0.0897748	0.0755797	0.0890579	0.154441	0.134831	0.0657162	0.0774831	0.0809965	0.0752422	0.083535	0.0841558	0.0305816	0.00274452	0.0984674	0.127714	0.038307	0.0725814	0.102956	0.0965959	0.0392846	0.0323127	0.00689655	0	0.0508647	0.0547305	0.131249	0.0928237
S(5,0)SumAverg	70.7115	66.2143	65.7404	66.8496	57	60.6	68.2295	66.8308	69.8418	69.8381	66.4857	68.1848	67.5275	66.1326	67.3333	67.3378	67.3548	66.5169	65.9854	64.9612	67.3659	63.65	68.1235	67.6607	63.4	55.4	65.4462	64.672	67.9302	62.08	66.2727	68.2059	66.4421	65.5507	46	0	63.1429	63.4194	61.2857	60.4848
S(5,0)SumVarnc	146.359	101.168	232.115	145.827	392	129.64	113.718	124.694	261.207	211.983	225.45	207.955	222.747	222.447	227.741	238.062	231.527	207.477	209.606	187.144	155.012	119.252	152.108	121.474	96.24	129.04	200.186	284.672	143.925	134.314	239.471	241.663	177.973	163.784	0	0	99.3224	153.631	236.704	237.462
S(5,0)SumEntrp	1.40186	1.24552	1.56617	1.55785	0.778151	0.939794	1.43175	1.48401	1.6953	1.61404	1.62014	1.60254	1.72274	1.67719	1.6873	1.54175	1.70493	1.68099	1.63123	1.59202	1.60445	1.54911	1.53155	1.408	0.939794	0.69897	1.65751	1.73884	1.42159	1.12985	1.58331	1.58009	1.57208	1.534	0	0	1.36977	1.49435	1.33153	1.34054
S(5,0)Entropy	1.99388	1.72669	2.24281	2.32982	1.07918	1.30103	2.06169	2.10005	2.39997	2.23258	2.23978	2.19938	2.61327	2.4614	2.30937	2.15399	2.55433	2.50645	2.36192	2.25249	2.52365	2.41811	2.15377	2.01696	1.30103	1	2.46867	2.4556	1.9135	1.66285	2.14061	2.09812	2.21538	2.09625	0.30103	0	1.8451	2.0303	1.69443	1.77393
S(5,0)DifVarnc	78.2851	89.4592	64.2972	88.1919	69.5556	102.24	85.907	94.0009	52.7133	51.3575	55.4634	65.7055	51.1158	65.0152	63.9904	90.9498	68.3306	70.0953	48.9528	59.4186	66.3073	94.6475	68.8508	81.0175	70.16	34	80.224	44.9604	81.4895	98.7936	73.0363	82.1903	58.2655	65.7026	0	0	95.391	74.9272	45.9898	69.3186
S(5,0)DifEntrp	1.34849	1.26703	1.39728	1.47171	0.778151	0.939794	1.369	1.46653	1.32124	1.30651	1.37774	1.37106	1.39555	1.43129	1.36645	1.38328	1.37037	1.39446	1.3318	1.38436	1.43106	1.48616	1.35029	1.2959	1	0.69897	1.42252	1.29402	1.41288	1.26844	1.35667	1.38715	1.34711	1.32811	0	0	1.25272	1.3055	1.16478	1.29717
_Area_S(0,5)	94	50	188	274	54	22	192	176	234	118	154	160	606	398	228	182	416	342	272	216	544	340	150	112	30	12	390	424	42	32	118	112	200	154	12	0	14	92	30	26
S(0,5)AngScMom	0.0119964	0.0208	0.00656406	0.00474186	0.0205761	0.0578512	0.00585938	0.00684401	0.00577106	0.00976731	0.00818013	0.00789063	0.00249431	0.00316911	0.00496307	0.00603792	0.00343241	0.00393283	0.00440636	0.00574417	0.00306823	0.00377163	0.00764444	0.0110013	0.0333333	0.0833333	0.00362919	0.00319286	0.0238095	0.0332031	0.0101982	0.0102041	0.0055	0.00708383	0.0833333	0	0.0714286	0.0122873	0.0355556	0.0414201
S(0,5)Contrast	295.149	292.24	124.936	205.701	300.259	108.727	253.156	228.716	246.487	299.814	74.3247	115.862	206.954	278.925	216.175	226.253	258.942	267.626	207.596	203.861	180.471	208.353	195.213	190.304	380.533	221.833	169.985	147.953	216.762	168.062	170.407	277.429	254.39	279.273	64.3333	0	416.286	283.957	370.533	203.385
S(0,5)Correlat	-0.35834	-0.325299	0.25639	0.0340247	-0.397076	0.221078	-0.31296	-0.33958	-0.220828	-0.346698	0.559156	0.461316	-0.0746523	-0.232325	0.0362355	-0.151473	-0.303898	-0.32401	-0.0574089	-0.0298444	0.00197334	-0.00696484	-0.132036	0.0661168	-0.649012	-0.614801	0.0601218	0.180494	0.183044	0.0441554	0.200498	-0.0524421	-0.230043	-0.286174	0.415742	0	-0.628193	-0.278207	-0.816419	-0.748499
S(0,5)SumOfSqs	108.643	110.254	84.0066	106.473	107.46	69.7934	96.4067	85.3685	100.951	111.314	84.2981	107.542	96.2887	113.17	112.152	98.2449	99.2955	101.066	98.1624	98.9767	90.4137	103.456	86.2223	101.888	115.382	68.6875	90.4291	90.2695	132.664	87.9131	106.571	131.802	103.407	108.567	55.0556	0	127.837	111.076	101.996	58.1598
S(0,5)InvDfMom	0.10345	0.0994226	0.0780528	0.0664806	0.0874199	0.159774	0.0496593	0.0441473	0.0726271	0.0804654	0.153523	0.146343	0.0697756	0.0532111	0.0641487	0.0784178	0.0655742	0.0724952	0.0832437	0.0637905	0.108847	0.102718	0.126466	0.123334	0.0284509	0.0556743	0.076253	0.0751884	0.0667906	0.0793491	0.130309	0.110965	0.0463319	0.0417937	0.130636	0	0.0214186	0.0867864	0.126461	0.151774
S(0,5)SumAverg	68.2553	66.32	66.1277	67.4964	66.1111	58.9091	68.5938	69.6932	68.9829	65.7458	67.8312	65.7625	66.9406	65.6482	68.9123	70.2308	68.7788	67.1813	66.3603	64.6389	66.6471	63.5529	68.76	66.2321	62.9333	57.5	66.4256	65.5472	67.9048	65.3125	66.5424	65.9286	66.89	64.4156	65.3333	0	63.7143	63	75.8667	81.2308
S(0,5)SumVarnc	139.424	148.778	211.09	220.192	129.58	170.446	132.47	112.758	157.316	145.444	262.868	314.306	178.201	173.756	232.431	166.727	138.24	136.64	185.054	192.046	181.184	205.471	149.676	217.25	80.9956	52.9167	191.732	213.125	313.896	183.59	255.875	249.781	159.238	154.996	155.889	0	95.0612	160.348	37.4489	29.2544
S(0,5)SumEntrp	1.43499	1.26844	1.59113	1.63689	1.23614	0.931927	1.5678	1.52318	1.56572	1.44931	1.55229	1.60291	1.68267	1.65758	1.64779	1.57068	1.6249	1.60362	1.66386	1.60449	1.67961	1.68329	1.50361	1.4882	1.01554	0.778151	1.66948	1.70598	1.29355	1.16649	1.47608	1.47251	1.54554	1.54831	0.778151	0	0.845098	1.40568	1.01554	0.957526
S(0,5)Entropy	1.9347	1.68693	2.2037	2.3661	1.69895	1.26032	2.24567	2.18394	2.27013	2.02596	2.1142	2.12978	2.6488	2.52687	2.31833	2.2303	2.50618	2.44026	2.37756	2.26545	2.57429	2.45223	2.13194	1.99009	1.47712	1.07918	2.47563	2.52617	1.62325	1.48634	2.01066	2.00621	2.27093	2.16015	1.07918	0	1.14613	1.92452	1.45705	1.39182
S(0,5)DifVarnc	126.702	102.902	41.622	69.1351	113.481	44.7273	67.7994	61.7778	68.025	98.5585	25.6876	39.0811	70.2259	93.7459	75.94	85.6609	93.1767	103.006	72.455	68.8281	69.6021	79.4637	96.0117	91.3721	107.182	73.8056	60.6481	50.2042	75.0385	48.4336	59.9787	102.811	75.0979	81.8155	19.8889	0	102.49	99.9414	127.173	93.9408
S(0,5)DifEntrp	1.31656	1.1871	1.30124	1.40183	1.22226	0.911269	1.4173	1.3918	1.43395	1.39643	1.20283	1.28049	1.45755	1.48914	1.4237	1.382	1.46859	1.47839	1.39846	1.37003	1.42276	1.43258	1.32791	1.28055	1.04053	0.677808	1.39694	1.36226	1.03173	0.964145	1.31044	1.39266	1.41523	1.43771	0.778151	0	0.845098	1.35012	1.13595	1.02132
_Area_S(5,5)	56	14	146	220	2	8	90	86	220	98	150	138	480	302	174	134	348	274	236	190	428	262	98	60	10	0	328	316	40	16	92	64	150	116	0	0	22	64	22	20
S(5,5)AngScMom	0.0216837	0.132653	0.00816288	0.00512397	0.5	0.125	0.0120988	0.0127096	0.00549587	0.0120783	0.00746667	0.0084016	0.00328993	0.00445156	0.00680407	0.00879929	0.00374884	0.00479514	0.00556593	0.006759	0.00325356	0.0046326	0.0106206	0.0166667	0.1	0	0.00369943	0.00410591	0.0275	0.0625	0.012051	0.015625	0.00871111	0.0114447	0	0	0.053719	0.0170898	0.053719	0.06
S(5,5)Contrast	155.25	72.8571	154.671	162.018	1849	336.25	337.911	312.163	270.218	271.714	227.387	250.623	210.604	230.305	376.264	297.94	223.195	242.445	182.907	158.611	202.164	188.641	214.776	199.733	119.6	0	223.22	126.646	594.55	50.75	400.217	266	137.893	180.207	0	0	211.818	178.312	262.364	188.9
S(5,5)Correlat	-0.450044	-0.214286	0.197513	0.252487	-1	-0.930045	-0.766232	-0.663625	-0.247968	-0.300071	-0.134129	-0.130998	-0.0878494	-0.0480331	-0.469026	-0.26411	-0.0773592	-0.116453	-0.0746068	0.0829806	0.0242745	0.133553	0.230927	0.359167	-0.597222	0	-0.128626	0.326125	-0.82462	-0.141251	-0.58044	-0.0957158	0.304738	0.171143	0	0	0.184848	0.315494	-0.724764	-0.638406
S(5,5)SumOfSqs	53.5328	30	96.3699	108.371	462.25	87.1094	95.6588	93.82	108.263	104.5	100.247	110.797	96.7984	109.875	128.066	117.846	103.584	108.578	85.104	86.4816	103.597	108.859	139.633	155.839	37.44	0	98.8899	93.9682	162.924	22.2344	126.616	121.382	99.1664	108.708	0	0	129.926	130.249	76.0579	57.6475
S(5,5)InvDfMom	0.0196411	0.0336551	0.0903752	0.072154	0.000540541	0.00493855	0.0236848	0.0226844	0.0694959	0.10342	0.0756901	0.0804332	0.0887124	0.0732589	0.0915754	0.0951157	0.0692948	0.0774281	0.0759218	0.0830716	0.0913834	0.084868	0.070384	0.0502125	0.0270005	0	0.0790784	0.0875168	0.0208471	0.191471	0.0544072	0.0772455	0.211116	0.268345	0	0	0.00923264	0.0726035	0.140628	0.254234
S(5,5)SumAverg	61.1071	56	66.3699	64.6364	75	50.25	60.1778	58.6279	67.2364	63.7959	67.2533	66.4493	67.6375	64.2781	69.023	66.7463	67.5632	66.5474	67.6695	64.5895	65.4065	64.687	65.7143	66.3333	54.8	0	66.5854	64.7468	64.45	62.25	63.4348	64.3125	66.88	66.8276	0	0	74.5455	70.0625	74.3636	76.1
S(5,5)SumVarnc	58.8814	47.1429	230.808	271.468	0	12.1875	44.724	63.1174	162.835	146.285	173.602	192.566	176.589	209.194	135.999	173.443	191.143	191.868	157.509	187.316	212.223	246.795	343.755	423.622	30.16	0	172.34	249.227	57.1475	38.1875	106.246	219.527	258.772	254.625	0	0	307.884	342.684	41.8678	41.69
S(5,5)SumEntrp	1.2159	0.640617	1.55246	1.68559	0	0.60206	1.29543	1.3176	1.5775	1.37391	1.51287	1.53071	1.65589	1.63616	1.50089	1.52112	1.65692	1.61748	1.54342	1.56065	1.70739	1.6645	1.54275	1.35671	0.69897	0	1.61999	1.65269	1.18062	0.827832	1.37243	1.44871	1.53892	1.57913	0	0	0.98666	1.34043	0.931927	1
S(5,5)Entropy	1.68368	0.941647	2.11176	2.30411	0.30103	0.90309	1.92748	1.9065	2.27948	1.94358	2.13997	2.10061	2.54373	2.38379	2.19211	2.07878	2.45635	2.35147	2.28487	2.20109	2.52592	2.35682	1.97894	1.77815	1	0	2.45163	2.41488	1.57196	1.20412	1.93107	1.80618	2.0968	1.97623	0	0	1.28769	1.77796	1.28769	1.24082
S(5,5)DifVarnc	35.0344	17.6735	55.4915	51.5772	0	38.6875	95.9358	84.3634	73.1987	93.5735	66.266	68.5688	79.5971	77.9211	132.258	120.693	70.2325	87.924	64.6872	50.888	80.4429	65.109	88.7863	74.2933	34.96	0	74.7958	40.3203	216.248	23.1875	85.5406	98.6211	70.8718	105.891	0	0	25.8678	61.4023	90.9917	65.69
S(5,5)DifEntrp	1.18102	0.640617	1.31425	1.32679	0	0.60206	1.3279	1.3463	1.44228	1.40133	1.42547	1.36432	1.45097	1.45252	1.49523	1.40091	1.45178	1.43904	1.40171	1.35903	1.42339	1.39629	1.31772	1.21257	0.69897	0	1.4227	1.32955	1.24082	0.677317	1.36082	1.27689	1.2446	1.21131	0	0	0.801803	1.19453	0.801803	0.879588
_Area_S(5,-5)	78	32	132	206	8	0	106	120	206	104	106	112	502	320	150	100	388	316	172	114	454	282	122	82	0	0	310	324	14	8	80	102	128	86	6	0	0	66	10	8
S(5,-5)AngScMom	0.0144642	0.03125	0.00837925	0.00598548	0.125	0	0.0129939	0.0106944	0.00622113	0.0110947	0.00996796	0.00924745	0.00292059	0.00384766	0.00746667	0.0104	0.00364013	0.00422609	0.00628718	0.00923361	0.0035514	0.00452694	0.00940607	0.0130874	0	0	0.00420395	0.0038866	0.0918367	0.125	0.01375	0.0109573	0.00866699	0.0127096	0.166667	0	0	0.0160698	0.1	0.125
S(5,-5)Contrast	283.154	140.562	301.152	226.282	61.5	0	109.264	173.967	222.854	300.462	163.019	167.625	209.729	233.456	198.333	281.3	187.046	200.551	225.07	217.281	151.256	190.191	201.164	179.805	0	0	150.948	149.617	63.5714	153.75	128.8	305.549	236.922	273.767	354	0	0	211.939	194.8	270.25
S(5,-5)Correlat	-0.275617	-0.437089	-0.215065	-0.129449	0.0955882	0	0.389852	0.192437	-0.0957406	-0.335156	0.138963	0.163624	-0.0384495	-0.0893987	0.125254	-0.0886467	0.0625789	-0.0218063	0.0282872	0.109474	0.225509	0.0843816	0.0292642	-0.333575	0	0	0.186414	0.204551	-0.50884	-0.623227	0.292691	-0.515294	-0.0917672	-0.172999	-0.954601	0	0	-0.0939935	-0.858779	-0.934243
S(5,-5)SumOfSqs	110.987	48.9053	123.924	100.173	34	0	89.5391	107.711	101.691	112.519	94.6643	100.209	100.982	107.149	113.366	129.197	99.7665	98.1353	115.811	121.996	97.6483	103.86	103.614	67.4146	0	0	92.7673	94.0458	21.0663	47.3594	91.0494	100.822	108.504	116.696	90.5556	0	0	96.865	52.4	69.8594
S(5,-5)InvDfMom	0.0902159	0.0883037	0.125803	0.100936	0.0803167	0	0.141006	0.117853	0.0470192	0.0342604	0.0639384	0.0868365	0.0768731	0.0719862	0.0938601	0.0504553	0.107203	0.0920339	0.0562682	0.0724736	0.0857809	0.0649418	0.0854581	0.0692784	0	0	0.086493	0.103951	0.0331327	0.129289	0.201175	0.139048	0.0530083	0.031926	0.0679245	0	0	0.114331	0.020041	0.00995637
S(5,-5)SumAverg	63.9744	52.0625	64.697	66.6116	59	0	71.2264	68.7	67.6699	65	64.9434	63.5536	66.7092	66.8312	66.04	65.54	68.1289	67.6772	64.5814	65.7719	65.7577	63.9078	63.9508	64	0	0	66.3032	65.8025	57.8571	47.75	67.05	64.2157	67.4844	67.907	52.6667	0	0	61.4545	86	89.75
S(5,-5)SumVarnc	160.794	55.0586	194.545	174.412	74.5	0	248.892	256.877	183.91	149.615	215.638	233.211	194.198	195.14	255.132	235.488	212.019	191.991	238.174	270.702	239.338	225.247	213.293	89.8537	0	0	220.121	226.566	20.6939	35.6875	235.398	97.7378	197.094	193.015	8.22222	0	0	175.521	14.8	9.1875
S(5,-5)SumEntrp	1.35746	1.0394	1.52655	1.54661	0.60206	0	1.45943	1.48583	1.58687	1.42502	1.52108	1.51024	1.66963	1.67559	1.55381	1.45201	1.68205	1.64026	1.59225	1.5136	1.69161	1.63765	1.36831	1.29693	0	0	1.65262	1.69308	0.759089	0.60206	1.34788	1.33344	1.4974	1.39359	0.477121	0	0	1.38392	0.69897	0.60206
S(5,-5)Entropy	1.8535	1.50515	2.08865	2.24957	0.90309	0	1.92307	2.00392	2.23639	1.97072	2.00827	2.03847	2.58134	2.44022	2.13997	1.98796	2.47166	2.40583	2.21103	2.04106	2.50372	2.37391	2.04195	1.89179	0	0	2.40008	2.43853	1.06012	0.90309	1.87299	1.97318	2.07428	1.9065	0.778151	0	0	1.8013	1	0.90309
S(5,-5)DifVarnc	99.169	46.7148	116.85	83.908	19.25	0	41.9003	64.4156	54.1067	73.1479	56.1111	65.1094	71.409	72.959	73.1918	89.2004	67.2906	70.3308	66.7783	63.4337	56.9004	66.0508	74.3246	60.4093	0	0	56.1687	55.6949	10.4898	38.1875	59.91	136.549	54.2498	60.4716	98	0	0	88.9311	50.8	52.6875
S(5,-5)DifEntrp	1.34407	1.09123	1.38449	1.3894	0.60206	0	1.25195	1.33986	1.33495	1.27297	1.25472	1.30205	1.44537	1.46333	1.37271	1.34439	1.41511	1.41212	1.42898	1.37489	1.37967	1.38992	1.31474	1.24105	0	0	1.36886	1.37326	0.759089	0.60206	1.20599	1.32379	1.37912	1.36559	0.276435	0	0	1.19906	0.69897	0.60206
Horzl_RLNonUni	91.819	61.4638	134.139	196.604	44.5	36.3333	135.168	131.298	166.128	140.474	140.032	149.116	358.478	264.457	172.337	138.284	285.443	234.291	200.402	168.281	324.358	235.454	123.569	90.9811	48.04	34	234.801	245.569	80.0244	56.1333	106.934	104.076	137.405	106.622	33	14	62.1212	101.45	57.2857	55.4127
Horzl_GLevNonU	3.95238	2.53623	5.56962	6.96226	2.38462	2.14286	4.58042	4.80142	6.90521	5.42105	5.11465	4.75484	11.3785	8.22143	5.80435	4.74324	9.1962	8.02239	6.43925	5.88764	11.1296	7.5498	5.0146	4.4717	2.08	1.64706	8.01471	8.27402	3.07317	2.56667	3.90164	3.7395	4.63291	4.2126	2.09091	1.28571	2.90909	3.82883	2.39683	2.61905
Horzl_LngREmph	1.24762	1.17391	1.24684	1.11321	1.32692	1.33333	1.15385	1.14184	1.45024	1.11842	1.17197	1.05806	1.13043	1.08571	1.125	1.13514	1.18354	1.22015	1.1215	1.08427	1.1493	1.11554	1.22628	1.32075	1.06	1	1.23897	1.20285	1.03659	1.1	1.29508	1.20168	1.24051	1.33858	1	1	1.09091	1.13514	1.14286	1.26984
Horzl_ShrtREmp	0.948677	0.956522	0.938291	0.971698	0.939637	0.943122	0.977078	0.972419	0.908504	0.970395	0.957006	0.985484	0.967391	0.978571	0.974789	0.973724	0.961146	0.949109	0.974818	0.978933	0.965806	0.975542	0.959651	0.940776	0.985	1	0.944342	0.949288	0.990854	0.975	0.949283	0.94958	0.946906	0.932852	1	1	0.977273	0.966216	0.964286	0.950176
Horzl_Fraction	0.929204	0.945205	0.923977	0.963636	0.912281	0.913043	0.959732	0.959184	0.879167	0.962025	0.945783	0.981013	0.958333	0.972222	0.963351	0.961039	0.946108	0.933798	0.963964	0.972678	0.954301	0.965385	0.938356	0.913793	0.980392	1	0.928328	0.936667	0.987952	0.967742	0.924242	0.937008	0.929412	0.907143	1	1	0.970588	0.956897	0.954545	0.926471
Vertl_RLNonUni	96.3962	64.2571	145	182.633	54.0357	40.1818	122.05	114.644	183.986	137.649	140.032	134.853	337.888	244.648	167.699	125.389	289.327	238.695	186.273	157.659	298.484	230.8	128.514	95.8991	51	34	242.985	232.542	77.0988	47.8772	106.317	106.817	148.531	121.466	33	14	56.5	113.017	54.5161	62.1212
Vertl_GLevNonU	3.90566	2.68571	5.97531	6.61353	2.53571	2.27273	4.30935	4.48148	7.10046	5.07947	5.24204	4.64	10.8956	7.9011	6.07104	4.77778	9.14465	8.00372	6.24402	5.65896	10.5884	7.872	5.11429	4.44954	2.13725	1.64706	7.86545	8.00364	3.02469	2.40351	3.92683	3.73333	4.8642	4.5188	2.09091	1.28571	2.84375	4.06087	2.41935	2.84848
Vertl_LngREmph	1.25472	1.12857	1.16667	1.18841	1.05357	1.13636	1.23022	1.28148	1.30594	1.13907	1.17197	1.16	1.20104	1.16484	1.13115	1.20833	1.15723	1.21561	1.19617	1.20809	1.25217	1.12	1.12857	1.19266	1	1	1.20364	1.28727	1.07407	1.26316	1.21951	1.175	1.16049	1.17293	1	1	1.1875	1.02609	1.19355	1.09091
Vertl_ShrtREmp	0.962854	0.967857	0.958333	0.952899	0.986607	0.965909	0.95044	0.93786	0.933663	0.965232	0.957006	0.96	0.95264	0.958791	0.967213	0.947917	0.964186	0.954358	0.956273	0.964234	0.945109	0.97	0.967857	0.951835	1	1	0.953131	0.936263	0.981481	0.934211	0.945122	0.95625	0.966735	0.965121	1	1	0.953125	0.993478	0.951613	0.977273
Vertl_Fraction	0.938053	0.958904	0.947368	0.940909	0.982456	0.956522	0.932886	0.918367	0.9125	0.955696	0.945783	0.949367	0.938725	0.947917	0.958115	0.935065	0.952096	0.937282	0.941441	0.945355	0.927419	0.961538	0.958904	0.939655	1	1	0.938567	0.916667	0.975904	0.919355	0.931818	0.944882	0.952941	0.95	1	1	0.941176	0.991379	0.939394	0.970588
45dgr_RLNonUni	101.294	64.2571	159.192	199.46	54.0357	43.0444	131.504	126.7	222.308	146.208	148.45	140.474	364.145	258.719	176.269	139.336	307.498	260.583	193.635	162.557	342.552	233.645	128.514	104.286	42.375	34	272.343	254.406	74.225	53.3051	123.14	112.41	135.823	115.87	30.0625	14	65.0299	110.07	66	65.0299
45dgr_GLevNonU	4.21101	2.68571	6.04192	7.01878	2.5	2.2	4.60839	4.77143	7.80342	5.41558	5.35	4.67105	11.3766	7.95683	6.02151	4.91946	9.42462	8.30216	6.44076	5.80682	11.5138	7.90837	5.34286	4.76786	2	1.64706	8.28671	8.23675	3.025	2.52542	4.13178	3.80328	4.81013	4.37405	1.875	1.28571	3	4.01754	2.66667	2.91045
45dgr_LngREmph	1.11009	1.12857	1.07186	1.09859	1.05357	1.06667	1.12587	1.15	1.07692	1.07792	1.1125	1.11842	1.1145	1.10791	1.08065	1.10067	1.08308	1.09712	1.17536	1.11932	1.08287	1.10757	1.12857	1.10714	1.1875	1	1.07343	1.19435	1.1125	1.15254	1.06977	1.12295	1.22785	1.22137	1.09375	1	1.04478	1.05263	1	1.04478
45dgr_ShrtREmp	0.972477	0.967857	0.982036	0.975352	0.986607	0.983333	0.968531	0.9625	0.980769	0.980519	0.971875	0.970395	0.971374	0.973022	0.979839	0.974832	0.979231	0.975719	0.966693	0.97017	0.979282	0.973108	0.967857	0.973214	0.953125	1	0.981643	0.959266	0.971875	0.961864	0.982558	0.969262	0.943038	0.953138	0.976562	1	0.988806	0.986842	1	0.988806
45dgr_Fraction	0.964602	0.958904	0.976608	0.968182	0.982456	0.978261	0.959732	0.952381	0.975	0.974684	0.963855	0.962025	0.963235	0.965278	0.973822	0.967532	0.973054	0.968641	0.95045	0.961749	0.973118	0.965385	0.958904	0.965517	0.941176	1	0.976109	0.943333	0.963855	0.951613	0.977273	0.96063	0.929412	0.935714	0.969697	1	0.985294	0.982759	1	0.985294
135dr_RLNonUni	87.5577	61.4638	152.378	202.336	54.0357	40.1818	143.054	141.055	194.785	128.238	151.311	149.116	372.727	261.581	181.075	145.119	285.443	248.15	194.689	168.281	314.273	233.645	128.514	98.6545	45.1633	31.0606	256.95	253.803	74.225	56.1333	109.634	112.41	158.193	131.131	27.2581	11.1538	58.2188	101.45	60.125	65.0299
135dr_GLevNonU	3.86538	2.56522	5.89024	7	2.57143	2.09091	4.7415	4.86207	7.21525	5.05442	5.31056	4.74194	11.2879	8.08961	5.97326	5.01325	9.10127	8.01831	6.35849	6.05618	11.1534	7.87649	5.21429	4.67273	2.06122	1.60606	8.09286	8.21831	3.025	2.6	3.92683	3.85246	4.9759	4.57664	1.77419	1.15385	2.84375	3.88288	2.59375	2.9403
135dr_LngREmph	1.25962	1.17391	1.14024	1.08411	1.05357	1.13636	1.04082	1.04138	1.24664	1.2381	1.09317	1.05806	1.09091	1.09677	1.07487	1.0596	1.18354	1.16117	1.15094	1.08427	1.17045	1.10757	1.12857	1.16364	1.12245	1.09091	1.14643	1.16901	1.1125	1.1	1.25203	1.12295	1.07229	1.06569	1.19355	1.23077	1.21875	1.13514	1.09375	1.04478
135dr_ShrtREmp	0.935096	0.956522	0.971714	0.978972	0.986607	0.965909	0.989796	0.989655	0.948306	0.948035	0.976708	0.985484	0.977273	0.975806	0.987225	0.985099	0.961146	0.963777	0.967505	0.978933	0.957386	0.973108	0.967857	0.959091	0.969388	0.977273	0.967361	0.957746	0.971875	0.975	0.955059	0.969262	0.981928	0.983577	0.951613	0.942308	0.962674	0.966216	0.976562	0.988806
135dr_Fraction	0.920354	0.945205	0.959064	0.972727	0.982456	0.956522	0.986577	0.986395	0.929167	0.93038	0.96988	0.981013	0.970588	0.96875	0.979058	0.980519	0.946108	0.95122	0.954955	0.972678	0.946237	0.965385	0.958904	0.948276	0.960784	0.970588	0.955631	0.946667	0.963855	0.967742	0.931818	0.96063	0.976471	0.978571	0.939394	0.928571	0.941176	0.956897	0.969697	0.985294
_AreaGr	74	48	130	175	31	26	108	109	185	111	123	118	341	236	146	115	271	230	173	140	312	211	109	83	29	17	239	243	55	38	94	92	129	105	15	4	39	81	38	40
GrMean	3.32978	4.04653	3.69624	3.88169	3.30951	4.3416	3.06464	3.44878	2.67572	3.11263	3.04124	3.70682	3.45138	3.8479	3.45362	3.73604	3.17876	3.11433	3.62002	3.83151	3.48606	4.00953	3.23848	3.36247	3.86203	4.472	3.39555	2.6118	3.86358	4.11256	3.05609	3.89455	3.49653	3.82617	4.56355	5.9875	4.23466	3.85416	4.02183	4.3293
GrVariance	3.2504	3.04227	4.49936	5.32107	2.49877	6.45817	2.39504	3.72061	2.16482	3.08628	2.53136	4.9205	3.07622	3.49451	3.1958	4.22459	3.64828	2.60093	5.57757	8.12668	3.93392	4.68669	5.15447	5.59738	3.63643	6.17768	3.95557	2.43777	3.16364	3.06055	3.04328	4.13684	3.89829	4.93186	2.77402	2.1499	5.65741	4.56517	3.11433	2.60719
GrSkewness	0.37142	0.141001	0.995148	0.916431	0.16741	0.873785	0.353955	0.738446	0.170372	0.560899	0.421082	0.805495	0.427269	0.237668	0.617348	0.412025	1.73431	0.675708	1.09927	1.46561	1.03989	0.484631	1.18479	2.11083	-0.115259	0.372771	1.22654	1.03138	0.264198	0.0978673	0.907297	0.61331	0.699186	0.650133	0.0260835	-0.102658	0.321297	0.538027	-0.115456	-0.425196
GrKurtosis	-0.549675	-0.532765	0.649897	0.976132	0.16263	-0.373243	-0.115135	0.00326347	-0.642729	-0.299193	-0.220632	0.265415	-0.106945	-0.574351	-0.11863	-0.554955	5.45676	0.557302	1.58629	2.15155	1.99696	-0.490615	0.878619	5.1616	-1.26052	-1.35146	1.88084	2.27481	-0.126149	-0.731914	0.789002	0.0828289	-0.198102	-0.475753	-0.420661	-1.79361	-0.733399	-0.397778	-0.603298	-1.0054
GrNonZeros	0.986486	1	0.984615	0.982857	0.935484	1	0.962963	0.981651	0.935135	0.981982	0.97561	0.974576	0.973607	0.978814	0.993151	0.991304	0.98893	0.973913	0.942197	0.957143	0.971154	0.985782	0.963303	0.987952	1	1	0.987448	0.954733	0.981818	1	0.978723	0.98913	0.992248	0.990476	1	1	0.974359	0.987654	0.973684	1
_AreaARM	79	48	133	174	32	27	105	106	195	118	129	118	340	235	149	114	274	234	175	141	309	207	110	83	29	15	240	242	59	41	99	92	132	104	14	5	46	86	41	44
Teta1	0.835755	0.827867	0.727311	0.623311	0.811551	0.823708	0.899996	0.880871	0.88926	0.873277	0.753158	0.733846	0.582244	0.52107	0.674619	0.743111	0.820763	0.756437	0.758484	0.678784	0.617415	0.64408	0.786564	0.624878	0.933351	0.714961	0.65802	0.666385	0.820068	0.798961	0.68044	0.763947	0.896416	0.832165	0.994328	1.02036	0.675891	0.636471	0.982911	0.95359
Teta2	-0.657424	-0.700528	-0.422843	-0.387783	-0.550684	-0.75296	-0.814595	-0.791928	-0.628171	-0.559865	-0.595226	-0.625727	-0.376203	-0.259931	-0.496652	-0.545802	-0.532459	-0.410101	-0.395863	-0.494475	-0.43709	-0.420794	-0.528223	-0.313033	-0.809382	-0.650327	-0.351613	-0.333039	-0.478361	-0.582368	-0.53027	-0.594299	-0.748154	-0.728696	-1.04872	-1.36281	-0.431017	-0.575749	-0.842194	-0.75754
Teta3	0.593361	0.650821	0.547445	0.683422	0.183384	0.832397	0.831371	0.809966	0.622651	0.58903	0.730736	0.778061	0.705197	0.676974	0.789443	0.776353	0.609305	0.53357	0.274897	0.396649	0.682949	0.560292	0.593634	0.564016	0.65834	0.405633	0.641673	0.578164	0.429634	0.497931	0.947467	0.840043	0.603092	0.627015	1.09978	1.04371	0.625093	0.711571	0.659631	0.528688
Teta4	0.18054	0.132353	0.139949	-0.101531	0.352279	0.000684492	0.0563248	0.0606675	0.124872	0.0823115	0.0408468	-0.047351	0.0492203	0.0402444	-0.011912	0.0289589	0.0885534	0.109594	0.271899	0.126777	-0.0325271	0.0104207	0.241052	0.100046	0.0990655	0.264008	0.0588372	0.0988132	0.220058	0.16676	-0.123226	-0.0338396	0.181363	0.147338	-0.06542	-0.0926744	0.0972537	0.00153282	0.141246	0.207707
Sigma	0.287471	0.335439	0.517807	0.584802	0.249795	0.325126	0.233046	0.238934	0.202307	0.308404	0.388	0.420168	0.458846	0.541986	0.437666	0.485701	0.325543	0.354561	0.383009	0.44501	0.50292	0.614967	0.350407	0.384771	0.377589	0.409256	0.373503	0.331159	0.421872	0.504188	0.359413	0.462393	0.296793	0.359332	0.332647	0.113072	0.609939	0.566037	0.21019	0.208508
WavEnLL_s-1	16154.3	15110.5	16551.7	16696.2	13711.3	14486	14996.8	14680.6	15476.3	14546.9	15647.7	15772.2	15777.4	15861.6	15761.4	15744.5	15900.7	15782.3	15446.7	14844.2	16546.7	16561.5	15680.2	16363.5	13898.9	11977	15908.2	16456.7	16511.9	15438.7	16346.9	16612.2	14706.2	15038.6	14064	10931	15770.5	14560.5	21616.2	22049.2
WavEnLH_s-1	90.4286	130.719	192.332	200.048	236.753	122.176	120.589	123.84	100.284	250.699	223.295	246.98	169.065	194.044	215.644	281.488	178.944	262.657	247.111	337.561	171.505	201.137	234.936	349.593	200.58	305.745	176.498	130.45	205.487	221.675	152.031	208.39	192.252	255.97	87.3125	340.427	243.688	326.753	254.668	277.283
WavEnHL_s-1	108.307	165.302	196.26	237.415	585.396	311.316	199.156	219.935	58.7842	146.469	118.369	167.954	343.176	456.087	358.432	312.706	139.375	189.269	189.932	219.966	296.959	406.49	141.746	178.593	205.372	366.149	190.393	134.424	146.195	168.662	300.881	353.896	248.164	289.445	325.62	917.76	271.198	268.72	103.463	142.424
WavEnHH_s-1	5.82857	8.10417	40.2602	66.1533	22.3363	7.26953	6.79444	7.00139	4.44521	10.3571	24.9522	35.5638	35.6165	59.9179	29.4068	41.1423	15.617	20.2191	29.1621	40.2614	45.6869	75.7967	24.6384	47.3428	19.8993	26.9952	22.5256	18.8635	20.0391	20.625	23.9062	32.9424	14.076	26.9085	17.7933	54.7604	77.8397	68.2736	18.5767	19.9239
